# Supplementary material
Source: publisher figshare collection journal article supplement (https://gsajournals.figshare.com/ndownloader/files/13025483)
Supplement: Supplementary file 1 [file 13025483]

## Sheet: Lmonocytogenes
Locus_Tag	Protein abundance			Site	Nuc	N_used	N_expected	Ratio
lmo1062	4.92			1	A	24	41.393	0.579808
lmo1506	5.23			2	G	48	82.785	0.579815
lmo1759	8.63			3	A	108	124.178	0.869719
lmo1092	12			4	A	194	165.571	1.1717
lmo0810	12			5	A	281	201.963	1.39134
lmo2449	12.2			6	G	338	228.901	1.47662
lmo1579	13.4			7	G	347	243.639	1.42424
lmo0974	13.5			8	A	326	247.139	1.3191
lmo2250	14			9	G	315	243.639	1.2929
lmo1441	14.1			10	G	234	228.901	1.02228
lmo1676	14.3			11	U	102	201.963	0.505043	GAUCA	0.254015
lmo2552	14.4			12	G	66	165.571	0.398621	CCUCC	1.30703
lmo2460	14.5			13	A	32	124.178	0.257695	Extended	0.918478
lmo1286	14.6			14	U	9	82.785	0.108715
lmo2353	14.6			15	C	0	41.393	0
lmo1557	14.9
lmo0204	15.2
lmo0054	15.6
lmo2561	16.4
lmo1175	16.8
lmo0514	17.3
lmo1291	19
lmo1559	19.1
lmo1538	19.3
lmo0608	19.3
lmo1603	19.7
lmo0929	19.7
lmo1279	19.9
lmo2715	20
lmo0786	21.5
lmo0441	21.7
lmo1521	21.8
lmo1808	22.1
lmo2036	22.7
lmo0177	23.4
lmo1792	23.8
lmo0956	24.6
lmo2752	25.1
lmo1566	26
lmo1592	26
lmo2194	26.1
lmo1585	26.7
lmo2716	26.7
lmo2006	26.8
lmo1275	27.1
lmo1699	27.2
lmo0006	27.3
lmo1131	27.3
lmo0231	27.4
lmo1853	28.1
lmo0971	28.3
lmo1438	28.6
lmo1276	29.7
lmo2229	29.7
lmo1073	30
lmo0192	30
lmo2035	30.4
lmo0825	30.9
lmo2033	31
lmo2211	32.2
lmo0198	32.2
lmo1246	32.8
lmo2489	33
lmo1858	33.2
lmo1235	34.2
lmo1360	35
lmo0536	36.6
lmo2471	37.5
lmo1177	37.6
lmo1937	38.8
lmo2417	39.9
lmo1709	40.3
lmo0907	41.1
lmo0239	41.6
lmo2296	41.8
lmo1847	42.4
lmo1600	43.9
lmo1339	44
lmo1703	45.2
lmo1448	45.5
lmo1537	45.5
lmo1319	47.1
lmo1664	47.1
lmo1688	47.3
lmo1851	47.4
lmo1080	48.4
lmo1995	48.7
lmo2371	48.7
lmo0785	48.8
lmo1822	49.1
lmo1294	49.6
lmo0727	49.9
lmo1830	50.9
lmo1607	51.3
lmo2072	52
lmo2674	53.1
lmo1379	53.6
lmo1825	53.7
lmo2510	54.6
lmo1255	54.9
lmo0013	55.3
lmo0443	55.7
lmo2693	57.2
lmo1483	57.9
lmo1011	59
lmo0560	59.1
lmo1305	61.5
lmo2790	62.1
lmo2704	62.2
lmo1454	62.5
lmo0962	63.1
lmo1357	63.8
lmo1076	67.2
lmo1450	67.6
lmo0237	68.5
lmo1691	71.4
lmo1773	74.4
lmo1017	75.1
lmo1993	78.3
lmo1896	81.8
lmo0641	83.6
lmo1615	84
lmo0117	84.2
lmo0691	86.1
lmo1077	87.2
lmo2530	88.5
lmo1424	90
lmo1860	90.4
lmo1583	92.2
lmo2779	92.7
lmo1132	92.9
lmo2505	95.9
lmo0055	97
lmo2547	98.8
lmo1902	98.9
lmo0723	99.8
lmo1295	104
lmo1299	105
lmo1436	105
lmo2751	110
lmo0997	112
lmo2389	115
lmo1986	116
lmo1793	118
lmo1604	118
lmo1849	118
lmo2695	119
lmo0228	120
lmo1217	120
lmo0601	122
lmo2526	123
lmo1083	123
lmo0894	123
lmo0988	123
lmo1086	123
lmo2525	126
lmo2650	126
lmo0097	127
lmo1075	129
lmo2291	130
lmo1325	131
lmo1641	131
lmo0191	132
lmo2267	133
lmo2089	135
lmo2414	136
lmo2360	138
lmo1539	139
lmo0433	139
lmo0278	141
lmo2101	142
lmo2559	143
lmo1389	143
lmo0664	147
lmo1087	149
lmo1636	149
lmo1611	151
lmo2754	153
lmo2064	154
lmo1374	155
lmo1472	157
lmo1594	157
lmo1801	158
lmo2488	160
lmo0246	162
lmo1954	162
lmo1431	163
lmo1967	165
lmo1298	174
lmo0978	175
lmo0415	177
lmo1096	179
lmo1072	179
lmo2152	180
lmo0002	183
lmo0292	191
lmo0848	193
lmo0893	194
lmo2533	198
lmo1620	198
lmo1663	199
lmo2205	201
lmo0855	202
lmo2683	210
lmo0232	210
lmo0697	212
lmo1331	213
lmo2192	214
lmo2569	215
lmo1754	218
lmo1755	218
lmo0662	221
lmo0847	222
lmo2115	231
lmo2558	231
lmo1767	240
lmo1527	255
lmo1014	262
lmo2611	289
lmo1710	301
lmo2114	303
lmo1856	303
lmo1599	307
lmo1067	313
lmo1673	345
lmo1138	347
lmo2155	360
lmo2118	374
lmo1917	389
lmo1938	414
lmo0118	430
lmo0631	430
lmo1496	434
lmo0259	436
lmo1268	439
lmo2206	442
lmo1581	448
lmo1180	451
lmo2528	453
lmo0891	458
lmo1807	467
lmo0199	474
lmo0279	477
lmo1406	482
lmo0210	509
lmo2507	525
lmo1376	538
lmo2103	546
lmo1280	547
lmo0258	555
lmo2829	560
lmo0152	579
lmo1480	585
lmo0129	588
lmo2415	606
lmo1055	637
lmo1785	661
lmo2020	701
lmo2201	707
lmo2369	715
lmo1474	742
lmo0972	757
lmo0045	776
lmo2532	782
lmo2193	845
lmo2425	873
lmo1784	930
lmo2376	939
lmo1054	944
lmo2622	952
lmo1399	962
lmo2538	996
lmo0220	1016
lmo2219	1017
lmo1805	1032
lmo0486	1033
lmo2468	1036
lmo1053	1077
lmo1003	1126
lmo2758	1149
lmo2785	1163
lmo1571	1192
lmo1322	1279
lmo0046	1328
lmo0211	1368
lmo2606	1393
lmo2456	1438
lmo0098	1461
lmo2154	1499
lmo1601	1514
lmo0053	1700
lmo1314	1704
lmo2032	1752
lmo1543	1759
lmo2629	1804
lmo1548	1859
lmo0223	1870
lmo0943	1894
lmo0096	1981
lmo0866	2007
lmo2638	2087
lmo2373	2098
lmo1439	2152
lmo1052	2262
lmo2367	2297
lmo2610	2386
lmo1233	2561
lmo2656	2631
lmo0196	2780
lmo0135	2782
lmo1570	2926
lmo2654	2992
lmo1634	3202
lmo2531	3204
lmo1388	3212
lmo1469	3299
lmo1267	3337
lmo2529	3349
lmo1398	3459
lmo1657	3477
lmo0355	3691
lmo1596	3922
lmo2556	3926
lmo2607	3956
lmo2605	4091
lmo2626	4153
lmo1787	4166
lmo2458	4339
lmo0250	4453
lmo2597	4551
lmo2609	4623
lmo1473	4795
lmo1330	4831
lmo2620	5317
lmo1658	5426
lmo2457	5552
lmo0197	5669
lmo2618	6009
lmo2614	6027
lmo2615	6163
lmo2613	6348
lmo2335	6525
lmo2627	7003
lmo2625	7155
lmo2633	8303
lmo2655	8400
lmo2596	8644
lmo2624	8878
lmo2632	8954
lmo2617	9168
lmo2608	9606
lmo2548	10165
lmo1783	10552
lmo0251	11256
lmo0248	11453
lmo0249	11516
lmo2616	11790
lmo1797	12862
lmo1540	14216
lmo2630	14612
lmo2069	14811
lmo2459	15990
lmo2628	16833
lmo2068	17002
lmo2621	18053
lmo2619	18569
lmo2455	18963
lmo2631	19668
lmo2653	19914
lmo1002	19948
lmo1542	21368
lmo0690	22555
lmo2623	28131
lmo0044	30527
lmo1364	46791
lmo2016	47782
lmo1934	127330

## Sheet: Spyogenes
GeneID	abundance			Site	Nuc	N_used	N_expected	Ratio
SPy_1073	35167			1	A	250	135.12	1.85021
SPy_0067	19025			2	G	368	270.24	1.36175
SPy_2018	18788			3	A	636	405.359	1.56898
SPy_1489	18020			4	A	832	540.479	1.53938
SPy_2039	17293			5	A	1010	648.682	1.557
SPy_0978	16690			6	G	1008	720.576	1.39888
SPy_1261	16184			7	G	992	760.904	1.30371
SPy_0274	15692			8	A	932	770.279	1.20995
SPy_1373	15212			9	G	764	760.904	1.00407
SPy_0806	14381			10	G	413	720.576	0.573153
SPy_0731	14318			11	U	256	648.682	0.394646	GAUCA	0.219299
SPy_1234	12947			12	G	124	540.479	0.229426	CCUCC	1.09795
SPy_0076	12607			13	A	85	405.359	0.209691	Extended	1.57546
SPy_0840	11110			14	U	55	270.24	0.203523
SPy_1831	10848			15	C	8	135.12	0.0592066
SPy_0613	10287
SPy_0072	10204
SPy_0066	10202
SPy_0611	10114
SPy_0819	9128
SPy_0065	9046
SPy_1889	8884
SPy_1262	8545
SPy_1931	8511
SPy_1514	8394
SPy_1371	8234
SPy_0272	7704
SPy_2160	7488
SPy_1072	7440
SPy_0055	7363
SPy_2005	7355
SPy_1881	7219
SPy_1896	6985
SPy_0071	6879
SPy_0063	6876
SPy_0080a	6692
SPy_0059	6618
SPy_0049	6314
SPy_1760	6195
SPy_2077	6122
SPy_0052	6104
SPy_1283	5992
SPy_0062	5896
SPy_1888	5849
SPy_0061	5698
SPy_0069	5690
SPy_0779	5688
SPy_0805	5635
SPy_2079	5605
SPy_0913	5557
SPy_0057	5544
SPy_0717	5504
SPy_0724	5482
SPy_1753	5353
SPy_0919	5215
SPy_0047	5163
SPy_0050	5153
SPy_0463	5057
SPy_1157	5008
SPy_0064	4965
SPy_0273	4940
SPy_2093	4820
SPy_0460	4796
SPy_0056	4785
SPy_1282	4776
SPy_2092	4645
SPy_1151	4578
SPy_1955	4565
SPy_1613	4476
SPy_2178	4362
SPy_1932	4297
SPy_1829	4270
SPy_1429	4159
SPy_1260	4054
SPy_0060	3983
SPy_0051	3971
SPy_2070	3911
SPy_0078	3850
SPy_1761	3665
SPy_1544	3642
SPy_0077	3534
SPy_1738	3470
SPy_0053	3438
SPy_2114	3399
SPy_0461	3381
SPy_1374	3279
SPy_1058	3272
SPy_2043	3260
SPy_0215	3247
SPy_1547	3180
SPy_1862	3180
SPy_1520	3072
SPy_1821	2943
SPy_0577	2911
SPy_1372	2859
SPy_1686	2840
SPy_0080	2834
SPy_2072	2776
SPy_1618	2743
SPy_2037	2627
SPy_0271	2608
SPy_0506	2547
SPy_2206	2528
SPy_1294	2499
SPy_0912	2490
SPy_0316	2456
SPy_0248	2449
SPy_1571	2438
SPy_1357	2409
SPy_0349	2401
SPy_1747	2383
SPy_1630	2372
SPy_0453	2370
SPy_0380	2356
SPy_1128	2325
SPy_1646	2284
SPy_1026	2282
SPy_0307	2272
SPy_1687	2236
SPy_1676	2212
SPy_0392	2193
SPy_2183	2152
SPy_1277	2118
SPy_0758	2099
SPy_1390	2009
SPy_2216	2006
SPy_0822	1976
SPy_1541	1929
SPy_0074	1901
SPy_1031	1890
SPy_1228	1890
SPy_0160	1816
SPy_2010	1788
SPy_1849	1781
SPy_0782	1773
SPy_1742	1769
SPy_1877	1762
SPy_1531	1755
SPy_0852	1753
SPy_1316	1752
SPy_1958	1740
SPy_1028	1684
SPy_0015	1660
SPy_1310	1632
SPy_0804	1629
SPy_1748	1618
SPy_0855	1617
SPy_0020	1617
SPy_1070	1578
SPy_1432	1572
SPy_1749	1524
SPy_0075	1485
SPy_0760	1479
SPy_2009	1478
SPy_1150	1472
SPy_0044	1469
SPy_2033	1450
SPy_1651	1411
SPy_1406	1376
SPy_0163	1372
SPy_2095	1354
SPy_0569	1343
SPy_0892	1318
SPy_0890	1305
SPy_1029	1301
SPy_0469	1259
SPy_0811	1244
SPy_0593	1242
SPy_0098	1238
SPy_0595	1230
SPy_0317	1200
SPy_1759	1191
SPy_2116	1167
SPy_0780	1165
SPy_0099	1154
SPy_2151	1136
SPy_1204	1134
SPy_1865	1098
SPy_1739	1097
SPy_2080	1087
SPy_0756	1064
SPy_0511	1061
SPy_1885	1048
SPy_1895	1040
SPy_1306	1031
SPy_0096	1030
SPy_0903	1024
SPy_1626	1014
SPy_0935	997
SPy_1643	997
SPy_1315	994
SPy_0019	990
SPy_0645	985
SPy_2197	984
SPy_0894	977
SPy_1962	975
SPy_0587	974
SPy_1038	966
SPy_0164	943
SPy_1224	918
SPy_1805	908
SPy_1835	902
SPy_2210	887
SPy_0588	886
SPy_1264	880
SPy_2034	871
SPy_1828	868
SPy_1884	861
SPy_1280	860
SPy_0226	839
SPy_1518	837
SPy_1740	834
SPy_1878	833
SPy_1780	831
SPy_0911	825
SPy_1743	820
SPy_1830	811
SPy_0395	805
SPy_1820	796
SPy_0330	781
SPy_1777	776
SPy_0836	773
SPy_0933	766
SPy_1354	757
SPy_0801	754
SPy_1263	752
SPy_0606	750
SPy_0936	744
SPy_1719	744
SPy_0514	737
SPy_0802	727
SPy_1200	726
SPy_1751	724
SPy_2045	724
SPy_1273	723
SPy_2207	705
SPy_1688	691
SPy_0457	690
SPy_1919	679
SPy_1542	655
SPy_1499	652
SPy_1854	649
SPy_1770	645
SPy_0239	638
SPy_1882	637
SPy_0927	634
SPy_0006	634
SPy_0173	630
SPy_0517	625
SPy_0109	605
SPy_1721	592
SPy_1415	592
SPy_1359	586
SPy_1529	582
SPy_0115	581
SPy_1389	573
SPy_1772	567
SPy_0854	566
SPy_1869	560
SPy_0224	559
SPy_0145	555
SPy_1285	552
SPy_1521	552
SPy_1513	550
SPy_1918	549
SPy_1125	548
SPy_0073	536
SPy_0003	536
SPy_1123	534
SPy_1033	533
SPy_1710	527
SPy_1923	521
SPy_1946	515
SPy_0901	512
SPy_1653	509
SPy_1724	506
SPy_1509	505
SPy_1154	501
SPy_1568	500
SPy_0830	497
SPy_0885	496
SPy_1750	491
SPy_1771	479
SPy_0462	476
SPy_1113	470
SPy_2000	463
SPy_0833	461
SPy_0269	457
SPy_1867	456
SPy_0439	438
SPy_1697	438
SPy_0721	436
SPy_0128	435
SPy_0130	430
SPy_1141	428
SPy_1239	428
SPy_2156	426
SPy_1689	425
SPy_1286	425
SPy_0841	425
SPy_0513	420
SPy_1745	420
SPy_1730	410
SPy_1240	403
SPy_1037	389
SPy_1343	389
SPy_0944	389
SPy_1976	387
SPy_1120	387
SPy_0470	381
SPy_1527	380
SPy_0203	379
SPy_0623	378
SPy_1971	368
SPy_1729	367
SPy_0183	364
SPy_0713	361
SPy_1625	360
SPy_0260	359
SPy_1779	357
SPy_0294	352
SPy_1886	351
SPy_1572	351
SPy_0238	345
SPy_0324	344
SPy_0184	344
SPy_1875	342
SPy_1936	342
SPy_1874	340
SPy_1503	339
SPy_0784	334
SPy_0369	328
SPy_1069	324
SPy_1020	324
SPy_1657	323
SPy_0835	322
SPy_2016	320
SPy_1333	320
SPy_1876	320
SPy_1098	317
SPy_1217	316
SPy_0319	314
SPy_1060	312
SPy_0351	311
SPy_0467	309
SPy_1057	309
SPy_1968	308
SPy_0268	306
SPy_2032	301
SPy_1649	299
SPy_0422	298
SPy_1097	297
SPy_0851	296
SPy_1842	295
SPy_1628	285
SPy_1368	282
SPy_0285	280
SPy_1312	278
SPy_1894	277
SPy_1659	275
SPy_1700	272
SPy_1302	272
SPy_0747	270
SPy_0769	269
SPy_1227	265
SPy_0651	260
SPy_0752	258
SPy_2190	253
SPy_1633	251
SPy_1810	248
SPy_1193	248
SPy_0865	245
SPy_2157	243
SPy_0599	241
SPy_2181	241
SPy_0190	240
SPy_0560	239
SPy_2189	238
SPy_1094	235
SPy_0844	235
SPy_2110	234
SPy_0768	234
SPy_0763	234
SPy_2048	233
SPy_0888	232
SPy_1549	232
SPy_0512	231
SPy_0711	231
SPy_0443	228
SPy_1707	225
SPy_0450	225
SPy_0857	224
SPy_0843	222
SPy_0728	222
SPy_1938	222
SPy_0022	220
SPy_2073	219
SPy_0832	217
SPy_1161	216
SPy_0528	216
SPy_1922	215
SPy_1436	215
SPy_1551	212
SPy_1851	210
SPy_2047	208
SPy_0759	207
SPy_1156	206
SPy_1637	206
SPy_1917	203
SPy_0408	203
SPy_1640	203
SPy_1758	203
SPy_2159	202
SPy_1110	202
SPy_0182	199
SPy_0905	199
SPy_1252	198
SPy_1746	198
SPy_0308	198
SPy_1059	198
SPy_1139	193
SPy_1213	188
SPy_2217	187
SPy_1393	184
SPy_0296	184
SPy_1100	183
SPy_0644	182
SPy_0712	182
SPy_0605	181
SPy_0900	180
SPy_1099	177
SPy_0476	176
SPy_0345	176
SPy_1658	176
SPy_0568	175
SPy_0185	172
SPy_1493	172
SPy_1508	170
SPy_1818	168
SPy_1582	167
SPy_1543	167
SPy_0447	166
SPy_1511	166
SPy_0837	166
SPy_1126	166
SPy_1427	165
SPy_0448	164
SPy_1053	164
SPy_1528	163
SPy_1708	160
SPy_0809	159
SPy_0761	159
SPy_0295	159
SPy_1043	157
SPy_0813	156
SPy_1731	156
SPy_0807	156
SPy_1723	155
SPy_1010	153
SPy_0799	152
SPy_1375	151
SPy_0122	151
SPy_0744	150
SPy_0886	149
SPy_2058	149
SPy_0348	147
SPy_1249	147
SPy_0123	146
SPy_0262	143
SPy_0740	143
SPy_0783	142
SPy_2119	141
SPy_1510	141
SPy_0036	140
SPy_1186	139
SPy_1963	138
SPy_0617	138
SPy_1405	138
SPy_1416	137
SPy_1959	136
SPy_0287	135
SPy_1674	135
SPy_1858	133
SPy_0567	132
SPy_1136	131
SPy_0727	131
SPy_1754	130
SPy_1744	130
SPy_0399	129
SPy_0652	129
SPy_1173	128
SPy_1642	128
SPy_1101	126
SPy_1022	125
SPy_1939	125
SPy_0924	123
SPy_1121	121
SPy_1972	121
SPy_1011	120
SPy_0790	119
SPy_1241	119
SPy_0175	118
SPy_1291	117
SPy_0621	116
SPy_0266	115
SPy_0580	115
SPy_0550	114
SPy_0252	113
SPy_0412	113
SPy_0881	111
SPy_1211	111
SPy_1727	110
SPy_0707	109
SPy_1440	109
SPy_0891	109
SPy_1275	108
SPy_1340	107
SPy_1370	107
SPy_0406	106
SPy_1344	105
SPy_1698	104
SPy_0466	103
SPy_0575	103
SPy_0889	103
SPy_1242	103
SPy_0297	103
SPy_1755	103
SPy_2173	102
SPy_0208	101
SPy_1525	101
SPy_1164	100
SPy_1274	99.6
SPy_2004	99
SPy_1500	98.8
SPy_0880	98.3
SPy_1226	97.9
SPy_1036	97.7
SPy_1378	97.1
SPy_0847	96.6
SPy_1709	95.8
SPy_0686	95.3
SPy_1652	95.3
SPy_0179	94.9
SPy_1580	93.7
SPy_0915	93.5
SPy_1581	93.3
SPy_2113	92.4
SPy_0454	92.3
SPy_0159	91
SPy_2188	91
SPy_1665	91
SPy_1496	89.4
SPy_1825	89.1
SPy_0853	88.8
SPy_0500	88.7
SPy_1281	88.4
SPy_1143	88.3
SPy_1160	88.3
SPy_1287	87.9
SPy_0127	87.9
SPy_1486	87.7
SPy_2150	87.6
SPy_0277	85.4
SPy_1678	84.6
SPy_1840	84
SPy_1140	83.7
SPy_1267	83.2
SPy_0326	82.9
SPy_2125	82.8
SPy_0092	82.4
SPy_1981	82.3
SPy_0124	82.2
SPy_0816	82.1
SPy_1369	82
SPy_0158	82
SPy_0004	80.9
SPy_0714	80.8
SPy_0359	80.6
SPy_1539	80
SPy_0751	79.8
SPy_0097	79.8
SPy_0007	79.6
SPy_0033	79.4
SPy_0792	78.8
SPy_1801	78.7
SPy_1502	77.7
SPy_1492	77.7
SPy_1945	77.7
SPy_1576	77.5
SPy_1391	77.2
SPy_1781	76.5
SPy_1251	75.4
SPy_0267	75.1
SPy_0650	75.1
SPy_0263	75
SPy_1497	74.6
SPy_0757	74.5
SPy_0444	74.4
SPy_0341	74.1
SPy_1733	74
SPy_1221	73.9
SPy_0827	73.9
SPy_1355	73.6
SPy_1152	73
SPy_1763	72.9
SPy_2059	72.8
SPy_1906	72.6
SPy_1487	72.4
SPy_0343	71.4
SPy_0749	71
SPy_2209	70.8
SPy_0615	70.7
SPy_0909	70.6
SPy_0264	70.2
SPy_0850	69.4
SPy_0235	69
SPy_1823	68.8
SPy_1035	67.8
SPy_1155	67.4
SPy_1019	67.1
SPy_1670	66.7
SPy_0174	66.2
SPy_0616	65.9
SPy_0604	65.8
SPy_0310	65.8
SPy_1243	65.7
SPy_0041	64.6
SPy_0276	64.6
SPy_0720	63.7
SPy_1358	63.6
SPy_1827	63.4
SPy_2202	63.4
SPy_1505	62.9
SPy_1892	62.8
SPy_0873	62.6
SPy_1691	62.2
SPy_0609	61.8
SPy_1866	61.6
SPy_1055	61.4
SPy_0810	61.1
SPy_1032	60.5
SPy_0657	59.7
SPy_1145	59.4
SPy_0472	59.3
SPy_1965	59.2
SPy_0405	59.2
SPy_1664	59.2
SPy_1189	58.3
SPy_0931	58.3
SPy_0388	58
SPy_0146	57.4
SPy_0584	57.3
SPy_0309	57.1
SPy_1565	56.9
SPy_1627	56.9
SPy_0877	56.3
SPy_0471	56.2
SPy_0793	56.1
SPy_1815	55.4
SPy_2182	55.2
SPy_0515	54.8
SPy_1122	54.5
SPy_0009	54.5
SPy_1898	53.9
SPy_2019	53.7
SPy_2117	53.5
SPy_0817	53.4
SPy_1694	53.1
SPy_1802	52.6
SPy_2185	52.2
SPy_0775	51.9
SPy_0289	51.5
SPy_0228	51.5
SPy_1693	51.4
SPy_1411	51.4
SPy_1498	51.3
SPy_1672	51.1
SPy_1214	51.1
SPy_0516	51
SPy_1536	51
SPy_1584	50.9
SPy_1988	50.7
SPy_0794	50.5
SPy_0741	50.3
SPy_0002	50.3
SPy_0818	50.2
SPy_0306	49.7
SPy_0363	49.6
SPy_0590	49.2
SPy_0883	49.2
SPy_1856	49.2
SPy_1309	49.1
SPy_1916	49
SPy_1726	49
SPy_2111	48.9
SPy_1206	48.4
SPy_2097	47.9
SPy_0930	47.7
SPy_0948	47.7
SPy_2065	47.5
SPy_1222	47.4
SPy_1606	47.1
SPy_0866	46.7
SPy_1941	46.6
SPy_0821	46.6
SPy_1276	46.5
SPy_1538	46.1
SPy_0247	45.9
SPy_0410	45.7
SPy_0932	45.5
SPy_1420	45.3
SPy_0726	44.7
SPy_0024	44.6
SPy_0923	44.4
SPy_0928	43.9
SPy_0864	43.6
SPy_0898	43.6
SPy_0045	43.5
SPy_1901	43.2
SPy_0942	43.2
SPy_1926	42.9
SPy_0849	42.9
SPy_0608	42.8
SPy_1434	42.7
SPy_1400	42.7
SPy_0362	42.7
SPy_0838	42.4
SPy_2029	42.3
SPy_1337	42.2
SPy_1292	42.1
SPy_1638	41.6
SPy_0882	41.6
SPy_1979	41.6
SPy_2066	40.9
SPy_0187	40.7
SPy_1704	40.6
SPy_0040	40.5
SPy_0282	40.4
SPy_0803	39.9
SPy_1621	39.7
SPy_1632	39.5
SPy_1295	39.4
SPy_0791	39.4
SPy_1537	39.3
SPy_1308	39.3
SPy_0338	38.8
SPy_1421	38.7
SPy_1067	38.5
SPy_1741	38.4
SPy_1270	38.3
SPy_0292	38
SPy_1577	37.8
SPy_1725	37.6
SPy_0787	37.5
SPy_1644	37.3
SPy_2002	37.2
SPy_1362	36.8
SPy_0312	36.7
SPy_1495	36.7
SPy_0288	36.5
SPy_1921	36.5
SPy_1071	36.3
SPy_0910	36
SPy_1990	36
SPy_1766	35.6
SPy_1171	35.5
SPy_0503	35.4
SPy_2085	34.7
SPy_0921	34.7
SPy_1215	34.7
SPy_0867	34.3
SPy_0800	34
SPy_1868	33.5
SPy_0441	33.4
SPy_0032	33.3
SPy_0035	33.3
SPy_2001	33.2
SPy_0722	31.8
SPy_1622	31.8
SPy_0643	31.7
SPy_0547	31.4
SPy_0154	31.4
SPy_0831	31.3
SPy_2121	30.8
SPy_1245	30.8
SPy_1591	30.6
SPy_1782	30.5
SPy_1837	30.4
SPy_0446	30.3
SPy_1566	30.1
SPy_0902	30.1
SPy_2042	29.9
SPy_0427	29.8
SPy_1034	29.7
SPy_0361	29.7
SPy_1960	29.1
SPy_1346	29.1
SPy_1533	29.1
SPy_2025	28.7
SPy_2054	28.7
SPy_1452	28.4
SPy_0505	28.3
SPy_1523	28.2
SPy_0144	27.9
SPy_1695	27.9
SPy_1961	27.6
SPy_1956	27.4
SPy_0259	27.4
SPy_1246	27.4
SPy_1937	27.4
SPy_0507	27.3
SPy_0320	27.3
SPy_0591	26.8
SPy_0370	26.8
SPy_0808	26.7
SPy_1765	26.3
SPy_0112	26.2
SPy_1401	26.1
SPy_2201	26
SPy_0899	25.9
SPy_0627	25.8
SPy_0155	25.7
SPy_1218	25.7
SPy_0596	25.4
SPy_1012	24.6
SPy_0576	24.3
SPy_1841	24.2
SPy_0440	24.1
SPy_1082	24
SPy_0879	24
SPy_1158	23.9
SPy_1237	23.8
SPy_0904	23.8
SPy_0552	23.7
SPy_1066	23.5
SPy_1314	23.4
SPy_1986	23.4
SPy_0729	23.3
SPy_1352	23.2
SPy_1068	23.1
SPy_1233	23.1
SPy_2215	22.8
SPy_1146	22.7
SPy_1138	22.7
SPy_0157	22.6
SPy_0716	22.5
SPy_1184	22.4
SPy_2184	22.2
SPy_0150	22.1
SPy_2196	22.1
SPy_2126	21.8
SPy_0504	21.7
SPy_0416	21.7
SPy_0653	21.7
SPy_0925	21.6
SPy_1093	21.5
SPy_0703	21.4
SPy_0922	21.4
SPy_1471	21.3
SPy_0108	20.8
SPy_1904	20.8
SPy_1629	20.8
SPy_0327	20.5
SPy_1040	20.5
SPy_1973	20.5
SPy_1250	20.4
SPy_0167	20.4
SPy_1209	20.1
SPy_1219	20
SPy_2195	20
SPy_2193	19.8
SPy_0739	19.6
SPy_0177	19.6
SPy_0824	19.6
SPy_1176	19.3
SPy_1870	19
SPy_0745	19
SPy_0378	18.8
SPy_1007	18.8
SPy_0538	18.6
SPy_1385	18.5
SPy_1202	18.5
SPy_0012	18.5
SPy_1188	18.3
SPy_0278	18.3
SPy_0314	18.3
SPy_1102	18.2
SPy_2049	18.2
SPy_1134	18.1
SPy_0532	18.1
SPy_0776	17.7
SPy_0770	17.7
SPy_0530	17.7
SPy_1293	17.7
SPy_1446	17.6
SPy_0431	17.6
SPy_0938	17.5
SPy_2148	17.3
SPy_1117	17.3
SPy_1046	16.9
SPy_0334	16.9
SPy_1284	16.8
SPy_0929	16.8
SPy_0598	16.7
SPy_2174	16.7
SPy_1210	16.5
SPy_1212	16.4
SPy_1666	16.4
SPy_1535	16.4
SPy_1989	16.4
SPy_1734	16.4
SPy_1133	16.3
SPy_0331	16.2
SPy_0176	16.2
SPy_0379	16.2
SPy_0737	16.2
SPy_0959	16.1
SPy_1025	16
SPy_0702	16
SPy_0008	15.8
SPy_1494	15.8
SPy_0342	15.8
SPy_2104	15.6
SPy_1817	15.4
SPy_0781	15.4
SPy_1474	15.1
SPy_0290	15
SPy_0464	14.9
SPy_1124	14.9
SPy_1811	14.8
SPy_2153	14.7
SPy_0539	14.7
SPy_1604	14.7
SPy_1564	14.5
SPy_0542	14.3
SPy_1524	14.3
SPy_0796	14.2
SPy_0265	14.1
SPy_2115	14.1
SPy_1192	13.8
SPy_1201	13.8
SPy_1562	13.6
SPy_0337	13.5
SPy_1558	13.4
SPy_0872	13.4
SPy_2096	13.3
SPy_0742	13.2
SPy_1784	13.1
SPy_0895	13.1
SPy_0186	13
SPy_0237	12.9
SPy_0230	12.8
SPy_0305	12.7
SPy_0970	12.7
SPy_2176	12.6
SPy_0629	12.6
SPy_2027	12.5
SPy_0129	12.5
SPy_0329	12.3
SPy_0508	12.2
SPy_0281	12.2
SPy_0425	12.1
SPy_0229	12.1
SPy_1844	12
SPy_0772	11.9
SPy_2142	11.8
SPy_0456	11.8
SPy_1619	11.8
SPy_0151	11.8
SPy_0390	11.7
SPy_0531	11.6
SPy_1301	11.6
SPy_0680	11.4
SPy_0524	11.1
SPy_1683	11.1
SPy_2031	11
SPy_1247	11
SPy_1995	10.9
SPy_1473	10.9
SPy_0533	10.9
SPy_0189	10.8
SPy_1662	10.8
SPy_1506	10.7
SPy_1135	10.7
SPy_1105	10.6
SPy_2205	10.6
SPy_1534	10.5
SPy_0201	10.5
SPy_1947	10.4
SPy_0261	10.3
SPy_0559	10.3
SPy_0962	10.3
SPy_1422	10.3
SPy_2084	10.2
SPy_1115	10.2
SPy_0846	10.2
SPy_0536	10.2
SPy_0166	10.1
SPy_0458	10
SPy_2003	9.97
SPy_1410	9.88
SPy_2203	9.69
SPy_2099	9.67
SPy_0385	9.63
SPy_1569	9.52
SPy_1787	9.44
SPy_0994	9.37
SPy_0236	9.29
SPy_1232	9.29
SPy_0178	9.25
SPy_1259	9.22
SPy_0907	9.15
SPy_1363	9.02
SPy_0997	8.93
SPy_1507	8.92
SPy_0110	8.92
SPy_1999	8.8
SPy_0210	8.64
SPy_1364	8.58
SPy_1905	8.58
SPy_1445	8.56
SPy_0875	8.45
SPy_1908	8.4
SPy_1833	8.28
SPy_0666	8.15
SPy_2204	8.13
SPy_1063	8.03
SPy_0137	7.99
SPy_1654	7.92
SPy_0585	7.88
SPy_0352	7.69
SPy_0654	7.67
SPy_1791	7.66
SPy_0861	7.5
SPy_1530	7.44
SPy_0013	7.39
SPy_1900	7.32
SPy_1515	7.28
SPy_1054	7.24
SPy_1409	7.22
SPy_0946	7.16
SPy_1924	7.15
SPy_1899	7.09
SPy_1846	7.08
SPy_0366	7.08
SPy_1588	7.05
SPy_0121	7.01
SPy_1715	6.95
SPy_1147	6.85
SPy_0537	6.74
SPy_0101	6.72
SPy_2006	6.49
SPy_1722	6.46
SPy_1311	6.4
SPy_0544	6.2
SPy_1911	6.19
SPy_2106	6.12
SPy_1424	6.11
SPy_0529	6.09
SPy_1414	6.07
SPy_1599	6.02
SPy_0689	5.91
SPy_0583	5.88
SPy_0038	5.85
SPy_1016	5.79
SPy_0199	5.78
SPy_1335	5.78
SPy_1304	5.76
SPy_1002	5.74
SPy_0365	5.74
SPy_0358	5.66
SPy_0496	5.55
SPy_1463	5.52
SPy_1366	5.46
SPy_2154	5.46
SPy_1984	5.44
SPy_0878	5.42
SPy_0697	5.41
SPy_1248	5.4
SPy_2164	5.35
SPy_0663	5.33
SPy_1634	5.33
SPy_0980	5.31
SPy_1457	5.3
SPy_0786	5.28
SPy_1465	5.25
SPy_0773	5.25
SPy_1163	5.23
SPy_0437	5.17
SPy_0339	5.13
SPy_1556	5.11
SPy_1567	5.06
SPy_1178	5
SPy_1408	4.99
SPy_1992	4.93
SPy_1519	4.79
SPy_1084	4.68
SPy_0103	4.68
SPy_1798	4.59
SPy_1001	4.58
SPy_1013	4.54
SPy_1610	4.4
SPy_0102	4.38
SPy_2103	4.37
SPy_0251	4.33
SPy_2200	4.24
SPy_1190	4.17
SPy_0242	4.17
SPy_1451	4.12
SPy_0570	4.11
SPy_1144	4.1
SPy_2147	4.08
SPy_1208	4.06
SPy_0549	4.06
SPy_2198	4.01
SPy_1350	4.01
SPy_0436	3.99
SPy_1006	3.98
SPy_0914	3.97
SPy_0622	3.92
SPy_0414	3.89
SPy_1008	3.86
SPy_0571	3.83
SPy_0815	3.8
SPy_0165	3.8
SPy_0949	3.75
SPy_1356	3.74
SPy_1181	3.73
SPy_1469	3.67
SPy_2050	3.67
SPy_1236	3.63
SPy_0874	3.63
SPy_0995	3.61
SPy_1491	3.56
SPy_0669	3.52
SPy_2089	3.42
SPy_2088	3.39
SPy_0700	3.29
SPy_1617	3.24
SPy_0258	3.22
SPy_0777	3.18
SPy_1460	3.18
SPy_1258	3.12
SPy_0133	3.04
SPy_0034	3.04
SPy_0981	3.03
SPy_1605	3.01
SPy_1442	2.97
SPy_2081	2.96
SPy_1205	2.94
SPy_0705	2.9
SPy_0679	2.88
SPy_1459	2.87
SPy_0984	2.86
SPy_0518	2.83
SPy_0196	2.82
SPy_1595	2.81
SPy_0960	2.79
SPy_1983	2.69
SPy_0628	2.68
SPy_0996	2.68
SPy_1991	2.6
SPy_0386	2.54
SPy_0555	2.53
SPy_1103	2.52
SPy_2136	2.52
SPy_0693	2.51
SPy_0377	2.44
SPy_0141	2.44
SPy_0655	2.44
SPy_1548	2.33
SPy_0148	2.31
SPy_1824	2.27
SPy_1477	2.25
SPy_0998	2.25
SPy_0223	2.25
SPy_0926	2.22
SPy_0688	2.22
SPy_2133	2.22
SPy_1912	2.2
SPy_1086	2.18
SPy_0534	2.17
SPy_1253	2.17
SPy_1386	2.16
SPy_0140	2.15
SPy_2144	2.15
SPy_0632	2.14
SPy_2155	2.13
SPy_1148	2.11
SPy_2007	2.1
SPy_0433	2.09
SPy_1085	2.08
SPy_1639	2.08
SPy_1793	2.06
SPy_2122	2.02
SPy_0142	2.01
SPy_0967	2.01
SPy_0510	1.99
SPy_2170	1.96
SPy_0646	1.95
SPy_0197	1.95
SPy_1225	1.94
SPy_0600	1.91
SPy_2120	1.9
SPy_2060	1.89
SPy_1647	1.81
SPy_1042	1.78
SPy_1419	1.78
SPy_1952	1.75
SPy_0244	1.61
SPy_1448	1.59
SPy_0876	1.58
SPy_1816	1.57
SPy_1987	1.55
SPy_1607	1.54
SPy_1107	1.51
SPy_0376	1.51
SPy_1109	1.5
SPy_1444	1.49
SPy_0371	1.48
SPy_1257	1.42
SPy_0972	1.42
SPy_1191	1.4
SPy_1914	1.39
SPy_1475	1.37
SPy_1326	1.36
SPy_2177	1.29
SPy_0965	1.27
SPy_1813	1.26
SPy_0340	1.22
SPy_1298	1.21
SPy_1353	1.2
SPy_1673	1.19
SPy_0676	1.18
SPy_1470	1.18
SPy_1328	1.12
SPy_0683	1.1
SPy_1903	1.08
SPy_0572	1.06
SPy_2074	1.05
SPy_0025	1.02
SPy_0545	1.02
SPy_1162	1.01
SPy_0664	1.01
SPy_1464	1
SPy_1325	0.959
SPy_1592	0.954
SPy_1488	0.951
SPy_1587	0.95
SPy_1255	0.941
SPy_1220	0.868
SPy_0280	0.833
SPy_2053	0.825
SPy_1198	0.815
SPy_0988	0.808
SPy_0492	0.802
SPy_2013	0.799
SPy_0519	0.775
SPy_0364	0.742
SPy_0526	0.666
SPy_2194	0.656
SPy_0839	0.61
SPy_0131	0.6
SPy_1785	0.599
SPy_1174	0.59
SPy_2082	0.571
SPy_0715	0.544
SPy_1737	0.535
SPy_1728	0.45
SPy_1399	0.4
SPy_0649	0.346
SPy_0023	0.343
SPy_0640	0.254
SPy_1788	0.244
SPy_1392	0.214
SPy_1361	0.208
SPy_1574	0.177
SPy_1807	0.173
SPy_0303	0.173
SPy_2180	0.173
SPy_0968	0.163
SPy_1985	0.158
SPy_0642	0.155
SPy_0778	0.137
SPy_2211	0.13
SPy_0671	0.125
SPy_2199	0.089

## Sheet: Llactis
Locus_Tag	Protein abundance		Site	Nuc	N_used	N_expected		Ratio
L102317	21774			1	G	232	104.005	2.23066
L120335	19924			2	A	431	208.011	2.07201
L85575	11581			3	A	569	312.016	1.82362
L0371	11107			4	A	727	416.022	1.7475
L0005	9613			5	G	760	485.3	1.56604
L0420	9406			6	G	719	527.778	1.36232
L128695	9381			7	A	671	547.367	1.22587
L0096	9122			8	G	522	547.367	0.953656
L0039	9027			9	G	267	527.778	0.505895
L0007	8444			10	U	141	485.3	0.290542
L0405	8360			11	G	74	416.022	0.177875	GAUCA	0.158424
L18872	7817			12	A	62	312.016	0.198708	CCUCC	1.12276
L0383	7814			13	U	26	208.011	0.124993	Extended	1.96845
L0009	7751			14	C	0	104.005	0
L0408	7350
L0404	7057
L0416	7002
L1762179	6436
L172505	6325
L0401	6098
L0414	5851
L0227	5818
L0395	5690
L0384	5516
L0392	5379
L0418	5353
L0396	5329
L0386	5325
L0410	5312
L0183	5304
L0010	5267
L0382	5158
L0393	5144
L0424	5099
L0403	5080
L0415	4990
L0398	4864
L0385	4805
L0407	4781
L0040	4479
L0419	4472
L178206	4448
L0423	4436
L19292	4373
L0387	4243
L0195	4242
L0413	4166
L27865	4108
L0380	4099
L0381	4095
L0006	4044
L0425	3987
L0394	3968
L0017	3758
L0379	3743
L0003	3669
L0041	3661
L0378	3645
L21264	3615
L0389	3556
L45002	3536
L0422	3511
L0391	3509
L0243	3480
L12227	3478
L13145	3469
L0411	3402
L3227	3379
L0412	3366
L0376	3329
L60543	3329
L0409	3307
L00096	3266
L0034	3242
L175538	3124
L0143	3112
L0397	3099
L0417	3067
L0208	3067
L0011	2978
L198515	2852
L0093	2842
L59867	2811
L0430	2781
L0012	2764
L0136	2733
L80411	2729
L0400	2701
L0273	2687
L0399	2686
L0336	2672
L95240	2663
L198893	2662
L0125	2589
L0368	2573
L0402	2553
L0002	2529
L60596	2510
L135351	2493
L0033	2459
L153863	2441
L0390	2391
L0377	2344
L0406	2303
L0388	2267
L0367	2206
L0140	2198
L145267	2186
L177590	2181
L154925	2174
L0035	2132
L72391	2128
L149295	2124
L61620	2074
L113864	2070
L0036	2056
L156559	2052
L0141	2036
L181692	2007
L147466	1986
L65029	1984
L179409	1951
L0118	1895
L43866	1879
L0185	1861
L82250	1857
L71932	1759
L0255	1740
L186107	1728
L2385	1721
L198033	1713
L12179	1666
L0347	1658
L0131	1605
L157316	1600
L107797	1580
L0375	1579
L0421	1542
L0186	1529
L152419	1505
L0205	1501
L161132	1499
L81189	1488
L0086	1464
L49741	1442
L164604	1416
L195348	1401
L7722	1389
L25115	1370
L140690	1364
L0366	1364
L6563	1360
L121426	1341
L0302	1324
L102360	1317
L0139	1301
L0359	1274
L62663	1272
L140714	1268
L0345	1252
L34806	1241
L197041	1220
L135991	1214
L134450	1201
L0344	1197
L126409	1177
L158071	1162
L66199	1158
L130687	1157
L137630	1138
L5126	1122
L101699	1120
L11208	1118
L70624	1115
L3272	1115
L0016	1111
L198323	1085
L0260	1077
L153665	1075
L166912	1072
L0138	1071
L210	1063
L140754	1061
L96847	1050
L162604	1046
L0190	1032
L0187	1028
L79267	1028
L120628	1019
L121253	1017
L63310	1012
L173813	1010
L8990	1009
L0356	1003
L168282	990
L109335	986
L118079	984
L0088	983
L0082	982
L0362	954
L68759	933
L0322	932
L154885	928
L0196	920
L192589	918
L153408	915
L187771	909
L0346	899
L109882	895
L182555	890
L145739	882
L84096	880
L162009	876
L0189	868
L57408	866
L5953	866
L0046	861
L0043	855
L174321	854
L0137	844
L41335	837
L168484	837
L88187	833
L0161	825
L148976	825
L197697	824
L0084	818
L25614	812
L105533	810
L0198	804
L146623	800
L0342	798
L64373	796
L0221	794
L165279	789
L0171	782
L0135	779
L0203	778
L0475	775
L48504	767
L0038	764
L0354	763
L0184	758
L165	749
L118271	745
L150031	745
L92665	743
L0004	741
L158343	737
L0044	732
L0349	725
L0275	723
L73818	718
L183563	710
L134453	709
L45583	708
L54546	693
L0474	692
L199221	688
L115968	686
L94534	684
L63684	683
L0085	681
L0372	676
L46694	674
L0062	668
L0325	653
L127411	650
L185517	644
L63652	643
L68758	640
L128697	634
L118696	632
L150515	631
L0224	631
L160425	628
L157023	628
L58125	622
L193909	618
L19816	618
L177350	617
L0158	614
L324	613
L10679	612
L00396	607
L00157	604
L88252	602
L0473	584
L0353	577
L18600	577
L43680	570
L63811	566
L0098	563
L174407	563
L181168	560
L168265	555
L101678	553
L56488	551
L45702	545
L0188	542
L74195	534
L0340	533
L143791	532
L127223	531
L155408	531
L73210	528
L0334	515
L166370	515
L320	510
L0091	510
L0024	508
L98310	500
L164012	496
L4822	495
L128696	494
L66233	493
L150593	493
L175101	492
L0295	486
L155044	486
L132777	486
L183602	486
L67226	485
L0063	482
L0181	482
L77482	480
L180805	478
L173881	477
L0321	475
L193644	474
L6876	472
L14408	471
L149828	468
L0180	464
L191486	460
L0160	457
L6328	456
L0097	455
L51032	448
L0244	434
L37651	429
L147936	427
L163602	427
L158188	425
L107468	422
L115551	421
L175357	421
L0116	420
L162872	415
L13187	412
L0197	412
L198485	406
L0059	405
L117444	403
L66222	401
L173068	398
L134243	397
L64175	396
L0064	396
L4702	396
L67726	392
L0095	391
L17654	388
L0092	386
L160442	384
L104007	384
L0355	381
L2866	378
L0272	376
L158710	369
L90422	369
L101560	368
L33556	367
L175147	363
L119013	361
L105494	361
L0094	357
L80045	354
L883	351
L153973	350
L155602	350
L0045	348
L0330	348
L56416	347
L52644	343
L0358	342
L159505	341
L0343	340
L0060	340
L35068	339
L138452	338
L121289	336
L0110	335
L0264	334
L0155	332
L8105	330
L91510	326
L110960	326
L4342	324
L0283	322
L192122	322
L0357	320
L156445	319
L92886	318
L166407	317
L0337	317
L108008	317
L196579	316
L0300	314
L0159	312
L0202	311
L196178	309
L0109	308
L118475	308
L62931	307
L0182	305
L0151	304
L114827	304
L194226	299
L75718	296
L0119	295
L11745	292
L154481	292
L32653	291
L0083	291
L71174	284
L91456	284
L173921	280
L64737	280
L117074	279
L198056	279
L96595	279
L141766	278
L54580	278
L0350	275
L0352	273
L0282	270
L6907	270
L113931	269
L164312	268
L0351	267
L160560	265
L0213	264
L104221	264
L167675	263
L104552	262
L176360	261
L22900	260
L38687	257
L119891	256
L16514	255
L0237	255
L0222	254
L0333	253
L109162	251
L22735	246
L98749	246
L108994	246
L0238	244
L75633	240
L67708	236
L151330	235
L172964	234
L164222	233
L67158	231
L87561	228
L147009	227
L0047	227
L101706	226
L54059	223
L124415	221
L135954	221
L12335	218
L123116	214
L107724	213
L70400	210
L76755	209
L0360	207
L37085	206
L115671	205
L178329	202
L85895	200
L76582	198
L37916	196
L0106	194
L108430	193
L0235	193
L117718	193
L185031	191
L0156	189
L129403	188
L48417	187
L0032	185
L53929	184
L190278	184
L152487	183
L0274	182
L117145	181
L166082	181
L87453	181
L57401	180
L10433	180
L86424	180
L19745	179
L0089	178
L29321	175
L0194	174
L0127	174
L7894	174
L100575	173
L0294	169
L110899	168
L177346	166
L118481	165
L128951	164
L72477	161
L11285	161
L166804	160
L180469	160
L114370	159
L0115	159
L133446	159
L111126	158
L192240	158
L162597	158
L0001	156
L0123	155
L39857	152
L7043	152
L0061	151
L0090	151
L182559	150
L86881	149
L102979	149
L167426	148
L0250	148
L54803	147
L88643	147
L0013	146
L0008	144
L171350	143
L18206	143
L45109	142
L0121	141
L159324	139
L0309	139
L158186	137
L123365	137
L0150	137
L42784	136
L104789	134
L179531	133
L87107	132
L0270	132
L0267	131
L191431	131
L0240	131
L190226	130
L0107	130
L3846	129
L1389	129
L0056	129
L141260	128
L0144	128
L141748	126
L0210	126
L47650	126
L0326	125
L105256	122
L103086	122
L159396	118
L95975	117
L0363	116
L114402	116
L0057	115
L15884	114
L0157	113
L9089	113
L153005	113
L157055	113
L131443	111
L65675	111
L192192	109
L0276	109
L0104	109
L129183	108
L7866	108
L41072	108
L51368	108
L54944	106
L139168	105
L16848	105
L131803	104
L190009	104
L165490	103
L182916	103
L26628	102
L169610	102
L154512	99.7
L0105	99.2
L84767	98.7
L0374	98.2
L102100	97.8
L6128	97.4
L0281	97.3
L0126	96.3
L156302	95.7
L56232	94.4
L0271	94.2
L12887	93.4
L0245	92.7
L17893	92.4
L9094	91.8
L0175	91.3
L0304	91.2
L75267	90.9
L0167	90.4
L0257	90.3
L45616	90.3
L165202	89.5
L189090	89.2
L102634	89
L72609	88.4
L0348	87.4
L0289	86.6
L0080	85.8
L52034	83.7
L192996	83.3
L108801	82.5
L177520	82.1
L38650	81.9
L1015	80.9
L166614	79.6
L97131	79.4
L163056	78.2
L52207	77.8
L0298	77.1
L99272	76.3
L0133	73.8
L138230	72.4
L0287	72.2
L63770	71.1
L161441	69.2
L19721	67.7
L0018	67
L130682	66.9
L109201	66.8
L0339	65.6
L0277	65
L187716	65
L0048	64.4
L107726	63.8
L0249	63.4
L186258	62.9
L0310	62
L0117	61.6
L0169	61.5
L0015	60.1
L80177	59.9
L89194	59.8
L46118	59.4
L0028	59
L53427	58.8
L0329	57.9
L120883	57.9
L47979	56.9
L73853	56.7
L171588	56.4
L74935	55.7
L57113	55.3
L170617	54.8
L0055	54.6
L186875	54.3
L191500	53.6
L0279	52.6
L53699	52
L130713	51.5
L0290	51.4
L0122	51.3
L0242	51.2
L0052	51
L179660	50.7
L110431	50.2
L0331	49.7
L5776	49.6
L00196	49.5
L34494	49.4
L0219	49.2
L0369	49.1
L113067	48.2
L92414	47.9
L195415	47.8
L123581	47.8
L3425	47.2
L184871	46.2
L0373	45.4
L13958	43.9
L80459	43.7
L0301	43.4
L85514	43.2
L49937	43.1
L112776	42.8
L81616	42.5
L47971	42.2
L11749	41.2
L124107	41
L121483	39.3
L119452	38.6
L119032	37.4
L102062	37.2
L135972	37.2
L67370	37.1
L0365	37
L19272	36.9
L0014	36.8
L110564	36.4
L67624	36.3
L0256	35.4
L177593	35.3
L11083	35
L142722	34.7
L21952	34.6
L169971	34.5
L43222	34.5
L32666	34.3
L132251	34.2
L118462	34
L2599	33.6
L0324	32.7
L70979	32.2
L0291	32.1
L98347	32.1
L0212	30.3
L77627	30.2
L29672	30.1
L93500	29.4
L0278	28.7
L93826	28.6
L87497	28.2
L137682	26.9
L88729	26.3
L104437	25.8
L0031	25.5
L184159	25.2
L11729	24.9
L67760	24.7
L70961	23.4
L0076	23.4
L180241	23.2
L0253	23
L68137	22.8
L0266	22.8
L157144	22.7
L1889160	22.7
L189881	22.1
L109527	21.4
L97777	20.8
L128694	20.6
L168650	20.5
L145301	20.3
L0058	20.2
L106374	19.8
L66281	19.4
L91444	19.2
L0049	19.1
L109747	18.5
L89079	18.4
L16653	18.3
L0308	18
L0146	17.6
L92987	17.5
L0132	17.5
L179659	17.4
L176724	17.4
L110479	17.2
L9458	16.9
L25787	16.8
L123777	16.6
L196779	16.4
L150584	16.4
L81453	16.3
L0176	15.9
L160485	15.7
L0261	15.7
L92850	15.5
L54021	15.5
L71486	15.2
L0286	15.2
L0130	14.8
L0335	14.7
L73435	14.6
L25961	14.2
L13150	14
L187815	13.9
L94890	13.6
L0251	13.3
L0199	13.2
L0177	13.1
L183112	13
L0111	12.4
L187315	11.9
L109453	11.9
L190126	11.8
L0307	11.6
L167555	11.4
L95846	11
L0077	10.7
L197116	10.7
L187450	10.6
L97415	10.4
L0029	9.87
L106965	9.66
L15012	9.52
L200004	9.5
L104021	9.43
L49824	9.19
L0108	9.03
L102491	8.97
L51437	8.64
L121175	8.59
L19516	8.57
L0361	8.5
L188472	8.46
L0280	8.32
L73239	8.22
L0252	8.08
L0229	7.73
L0254	7.66
L0103	7.36
L36404	7.18
L17695	7.18
L140141	7.08
L77437	6.82
L132875	6.62
L0269	6.48
L120334	6.39
L0148	6.3
L0179	5.92
L170983	5.86
L31393	5.81
L14736	5.47
L147291	5.27
L131805	5.2
L122198	5.14
L142310	4.85
L7798	4.74
L0284	4.67
L64491	4.55
L0037	4.43
L150744	4.31
L108989	4.28
L108425	4.18
L58790	4.16
L39484	4.1
L162229	3.95
L55605	3.58
L117821	3.46
L0134	3.13
L115025	2.98
L0259	2.88
L194050	2.83
L0292	2.77
L0323	2.76
L44747	2.73
L167877	2.71
L116532	2.7
L0262	2.69
L0192	2.55
L128690	2.5
L187016	2.39
L10014	2.33
L178227	2.3
L182799	2.29
L112353	2.26
L0129	2.25
L21300	2.05
L0152	2.03
L182020	1.99
L63697	1.96
L117867	1.66
L1006	1.66
L0020	1.63
L0328	1.53
L0078	1.51
L0113	1.47
L0124	1.46
L112352	1.33
L6094	1.22
L64811	1.15
L0112	0.839
L128693	0.8
L0303	0.762
L0114	0.742
L22116	0.563
L25762	0.541
L143624	0.541
L13324	0.537
L0232	0.472
L15262	0.428
L0201	0.06
L0074	0.054
L32812	0.032

## Sheet: Banthracis
GeneID	abundance			Site	Nuc	N_used	N_expected	Ratio
BAS1649	0.789			1	G	751	209.588	3.58322
BAS3442	0.912			2	G	967	419.176	2.30691
BAS3340	1.02			3	A	1062	627.264	1.69307
BAS1060	1.09			4	G	1136	828.352	1.3714
BAS0228	1.14			5	G	925	927.619	0.997177
BAS3323	1.22			6	U	470	927.619	0.506674
BAS2664	1.54			7	G	361	828.352	0.435805
BAS4389	1.58			8	A	243	627.264	0.387397
BAS2035	1.71			9	U	92	419.176	0.219478
BAS4562	1.72			10	C	17	209.588	0.0811115
BAS0716	1.89								GAUCA	0.326093
BAS4210	1.93								CCUCC	1.99035
BAS2724	1.94								Extended
BAS4620	1.94
BAS4713	1.95
BAS1082	1.97
BAS1022	2.01
BAS4074	2.04
BAS0226	2.07
BAS3526	2.12
BAS1098	2.17
BAS0460	2.18
BAS3160	2.22
BAS0694	2.23
BAS3326	2.25
BAS0771	2.32
BAS2567	2.34
BAS1479	2.35
BAS3624	2.38
BAS3421	2.4
BAS5194	2.44
BAS4806	2.5
BAS1963	2.57
BAS4006	2.63
BAS3176	2.66
BAS4761	2.72
BAS3704	2.74
BAS4532	2.82
BAS1124	2.83
BAS3767	2.85
BAS4209	2.87
BAS4676	2.93
BAS2981	2.93
BAS1385	2.94
BAS2142	2.96
BAS0718	2.97
BAS3949	2.98
BAS1738	3.02
BAS1716	3.1
BAS1045	3.13
BAS1320	3.15
BAS2120	3.16
BAS1120	3.18
BAS3671	3.19
BAS2524	3.21
BAS1958	3.23
BAS3349	3.34
BAS0598	3.4
BAS3870	3.41
BAS1979	3.43
BAS4225	3.58
BAS0082	3.63
BAS0050	3.67
BAS1433	3.68
BAS2096	3.71
BAS1329	3.77
BAS4414	3.82
BAS1476	3.86
BAS3186	3.93
BAS1876	3.99
BAS0310	4.03
BAS1174	4.16
BAS3392	4.28
BAS4715	4.29
BAS1407	4.36
BAS0332	4.38
BAS5337	4.39
BAS3617	4.4
BAS3524	4.45
BAS3563	4.48
BAS4585	4.51
BAS3969	4.55
BAS5037	4.59
BAS0354	4.64
BAS1987	4.84
BAS2139	4.84
BAS2745	4.85
BAS0784	4.85
BAS4304	4.9
BAS3692	4.96
BAS0651	4.98
BAS2680	4.99
BAS2896	5.03
BAS4496	5.05
BAS3321	5.07
BAS2221	5.08
BAS1508	5.1
BAS4834	5.11
BAS5215	5.17
BAS2301	5.17
BAS4259	5.21
BAS1129	5.23
BAS4505	5.26
BAS1382	5.29
BAS1311	5.32
BAS0362	5.38
BAS3551	5.42
BAS1977	5.42
BAS4357	5.43
BAS3632	5.43
BAS4170	5.54
BAS1406	5.56
BAS3725	5.56
BAS1445	5.61
BAS0634	5.64
BAS0731	5.66
BAS1002	5.7
BAS1192	5.71
BAS2027	5.78
BAS3220	5.83
BAS4693	5.89
BAS3391	5.9
BAS0950	5.92
BAS2685	6.03
BAS3669	6.13
BAS4103	6.14
BAS1573	6.15
BAS4244	6.18
BAS5115	6.18
BAS1296	6.2
BAS0823	6.2
BAS2199	6.28
BAS1069	6.29
BAS2160	6.42
BAS2644	6.42
BAS5090	6.47
BAS2589	6.48
BAS1008	6.51
BAS4951	6.51
BAS0984	6.65
BAS3227	6.65
BAS1786	6.66
BAS2178	6.83
BAS1470	6.85
BAS1458	6.9
BAS0785	6.93
BAS3375	6.97
BAS3672	7.02
BAS2785	7.04
BAS2855	7.07
BAS3083	7.09
BAS1324	7.14
BAS3315	7.14
BAS5243	7.15
BAS2744	7.25
BAS3327	7.25
BAS1309	7.27
BAS1808	7.36
BAS2651	7.39
BAS1274	7.4
BAS3345	7.42
BAS5335	7.45
BAS2418	7.58
BAS1322	7.64
BAS0696	7.65
BAS1308	7.66
BAS3693	7.67
BAS1724	7.69
BAS5240	7.69
BAS0342	7.72
BAS4738	7.74
BAS0489	7.75
BAS0021	7.78
BAS1879	7.8
BAS3713	7.82
BAS4294	7.84
BAS4192	7.88
BAS1825	7.92
BAS4786	7.94
BAS1998	7.97
BAS1339	8.13
BAS3962	8.15
BAS3521	8.15
BAS0803	8.27
BAS1257	8.29
BAS3293	8.33
BAS5183	8.33
BAS4563	8.36
BAS0195	8.36
BAS0700	8.44
BAS3282	8.47
BAS0760	8.53
BAS2756	8.55
BAS4262	8.57
BAS3281	8.67
BAS0088	8.67
BAS2587	8.73
BAS3720	8.78
BAS0038	8.86
BAS1303	8.92
BAS0832	8.93
BAS4155	8.99
BAS0052	9
BAS3715	9
BAS5060	9.01
BAS2032	9.09
BAS2657	9.15
BAS4191	9.3
BAS2082	9.37
BAS3740	9.5
BAS0513	9.55
BAS2236	9.55
BAS2562	9.62
BAS1841	9.83
BAS4826	9.86
BAS3130	9.9
BAS4451	9.97
BAS3377	9.99
BAS3837	9.99
BAS1746	10.1
BAS4203	10.1
BAS4215	10.2
BAS1474	10.2
BAS1226	10.2
BAS0148	10.3
BAS4242	10.3
BAS3081	10.3
BAS0968	10.4
BAS4569	10.5
BAS0798	10.5
BAS2010	10.6
BAS4388	10.8
BAS5330	10.8
BAS3688	10.8
BAS2899	10.9
BAS3374	11
BAS0055	11.1
BAS2147	11.1
BAS4280	11.1
BAS3853	11.1
BAS3234	11.2
BAS1218	11.2
BAS3727	11.4
BAS3861	11.4
BAS2101	11.5
BAS5106	11.6
BAS3660	11.7
BAS4796	11.9
BAS3286	12
BAS1087	12
BAS2091	12
BAS4543	12
BAS5043	12.2
BAS0042	12.3
BAS1522	12.3
BAS4009	12.4
BAS2803	12.5
BAS4086	12.5
BAS4874	12.6
BAS4421	12.8
BAS3662	12.8
BAS4465	12.9
BAS1464	13
BAS0495	13
BAS4146	13
BAS4757	13.1
BAS3140	13.1
BAS3733	13.2
BAS4586	13.2
BAS2361	13.3
BAS0890	13.3
BAS1995	13.3
BAS0338	13.3
BAS4306	13.3
BAS5167	13.4
BAS4443	13.4
BAS1787	13.5
BAS1990	13.6
BAS3630	13.7
BAS1075	13.7
BAS4365	13.8
BAS0035	13.8
BAS3700	13.9
BAS0814	14
BAS4830	14.1
BAS2490	14.1
BAS3904	14.1
BAS0247	14.1
BAS4766	14.2
BAS4495	14.2
BAS3668	14.2
BAS0083	14.3
BAS3763	14.3
BAS3944	14.3
BAS2135	14.3
BAS3718	14.5
BAS4159	14.5
BAS0324	14.6
BAS1442	14.7
BAS0350	14.8
BAS2515	14.8
BAS1150	14.9
BAS5056	14.9
BAS5190	15.2
BAS4827	15.2
BAS2394	15.3
BAS2940	15.3
BAS4112	15.3
BAS1328	15.3
BAS1874	15.6
BAS1744	15.6
BAS2093	15.6
BAS0360	15.7
BAS4162	15.8
BAS3273	15.8
BAS3593	15.9
BAS2850	16
BAS2253	16
BAS2829	16.1
BAS3726	16.1
BAS3924	16.1
BAS3620	16.2
BAS4017	16.2
BAS2816	16.3
BAS0029	16.3
BAS2158	16.4
BAS0093	16.6
BAS3633	16.7
BAS3434	16.7
BAS4383	16.8
BAS3197	16.9
BAS5011	17
BAS1066	17
BAS3247	17
BAS3135	17.1
BAS3722	17.1
BAS1826	17.2
BAS3983	17.3
BAS0492	17.4
BAS2885	17.5
BAS2782	17.9
BAS2597	18
BAS2136	18
BAS4202	18.3
BAS4349	18.4
BAS4379	18.7
BAS5082	18.8
BAS3069	18.8
BAS3172	18.9
BAS3378	19.1
BAS1824	19.1
BAS5053	19.1
BAS2710	19.2
BAS3752	19.3
BAS1349	19.3
BAS1621	19.5
BAS4546	19.7
BAS3885	19.8
BAS0237	19.9
BAS1443	20
BAS3136	20
BAS4925	20
BAS2143	20.2
BAS0922	20.2
BAS0472	20.3
BAS0565	20.5
BAS4206	20.5
BAS2860	20.6
BAS2156	20.7
BAS4479	20.7
BAS4313	20.7
BAS5314	20.7
BAS0576	20.8
BAS0838	20.9
BAS1102	21
BAS0012	21
BAS3079	21
BAS4361	21.1
BAS1729	21.1
BAS2875	21.4
BAS3199	21.5
BAS0316	21.5
BAS3888	21.6
BAS1094	21.8
BAS4163	21.9
BAS3557	21.9
BAS4848	22
BAS3911	22.3
BAS5303	22.3
BAS4545	22.3
BAS0346	22.5
BAS4779	22.6
BAS4047	22.6
BAS3078	22.7
BAS4683	22.8
BAS0411	22.8
BAS1891	22.8
BAS3405	22.9
BAS1287	23
BAS2374	23.1
BAS4053	23.2
BAS2950	23.4
BAS0296	23.4
BAS5248	23.6
BAS3833	23.6
BAS4291	23.6
BAS0248	23.6
BAS0698	23.7
BAS0002	23.8
BAS0065	23.9
BAS0385	24
BAS2943	24
BAS4331	24
BAS1263	24.1
BAS4005	24.1
BAS0016	24.1
BAS4211	24.6
BAS4081	24.6
BAS3513	24.9
BAS1576	25
BAS0995	25.1
BAS3390	25.2
BAS4079	25.3
BAS1697	25.4
BAS3098	25.5
BAS4482	25.6
BAS1819	25.6
BAS0566	25.7
BAS2273	25.7
BAS4723	25.9
BAS5174	26.1
BAS4296	26.3
BAS1726	26.4
BAS3182	26.5
BAS0724	26.7
BAS4292	26.9
BAS0293	27
BAS3855	27.1
BAS2404	27.1
BAS5166	27.2
BAS0308	27.3
BAS1541	27.5
BAS1683	27.5
BAS0290	27.7
BAS1199	27.7
BAS4447	28
BAS3918	28
BAS3269	28.1
BAS4152	28.1
BAS4484	28.2
BAS0668	28.4
BAS4937	28.6
BAS4157	28.7
BAS4023	28.8
BAS3427	28.9
BAS0848	29.1
BAS2691	29.3
BAS0312	29.5
BAS4265	29.6
BAS3562	29.9
BAS3121	29.9
BAS1756	30
BAS2700	30.1
BAS4507	30.2
BAS1095	30.2
BAS3023	30.3
BAS0245	30.5
BAS0084	31
BAS4233	31
BAS0179	31.2
BAS0907	31.2
BAS0319	31.2
BAS2983	31.3
BAS3642	31.4
BAS4290	31.4
BAS3290	31.5
BAS3973	31.5
BAS1188	31.6
BAS1483	31.7
BAS1145	31.7
BAS2137	31.7
BAS4376	31.7
BAS1089	31.8
BAS1754	31.8
BAS5191	31.9
BAS5332	32.1
BAS2094	32.7
BAS5001	32.8
BAS4089	32.8
BAS4302	33.2
BAS1781	33.3
BAS0072	33.3
BAS3484	33.4
BAS4385	34
BAS4547	35
BAS0757	35.4
BAS0327	35.4
BAS0196	35.5
BAS1062	35.6
BAS1284	35.6
BAS3864	35.6
BAS2435	35.9
BAS4442	36.1
BAS1362	36.1
BAS3967	36.3
BAS3711	36.4
BAS0627	36.4
BAS1978	36.7
BAS0504	36.9
BAS1780	37
BAS1834	37.1
BAS5338	37.1
BAS4277	37.3
BAS3636	37.5
BAS3738	37.5
BAS1468	37.6
BAS1449	37.9
BAS5193	37.9
BAS2615	38
BAS0068	38.1
BAS1170	38.2
BAS0014	38.5
BAS3618	38.7
BAS5250	38.7
BAS4366	39.1
BAS0482	39.6
BAS3874	39.9
BAS5290	40
BAS2642	40
BAS2679	40.1
BAS0132	40.4
BAS4876	40.5
BAS5287	40.6
BAS0177	40.7
BAS5033	40.7
BAS0591	40.8
BAS4228	41.1
BAS3765	41.2
BAS0366	41.3
BAS4584	41.4
BAS4552	41.6
BAS3684	41.6
BAS0402	41.9
BAS1132	41.9
BAS3356	42.2
BAS5229	42.4
BAS3941	42.9
BAS5322	42.9
BAS4731	43
BAS4955	43
BAS4045	43.1
BAS2197	43.2
BAS3520	43.2
BAS0632	43.5
BAS5258	44
BAS2017	44.1
BAS2287	44.2
BAS1216	44.3
BAS0604	44.4
BAS4457	44.5
BAS4582	44.5
BAS5319	44.5
BAS4577	44.5
BAS4315	44.6
BAS1307	44.7
BAS1281	44.9
BAS2185	45.2
BAS4725	45.4
BAS4069	45.5
BAS3743	46
BAS0166	46.1
BAS4046	46.3
BAS4271	46.7
BAS1676	46.9
BAS1377	46.9
BAS4949	47
BAS0812	47
BAS4269	47.4
BAS5336	47.4
BAS4938	47.5
BAS0569	47.6
BAS4434	47.7
BAS0563	47.8
BAS2319	47.9
BAS0147	48
BAS1051	48
BAS3703	48.2
BAS4869	48.3
BAS3923	48.6
BAS2377	48.7
BAS4158	48.8
BAS0005	49
BAS0770	49.5
BAS4088	49.6
BAS3181	49.6
BAS2643	49.6
BAS3559	50
BAS1438	50.1
BAS2145	50.3
BAS2521	50.3
BAS1877	50.5
BAS1969	50.6
BAS0745	50.6
BAS2303	50.6
BAS4799	50.6
BAS0629	50.9
BAS4165	51.3
BAS3433	51.5
BAS1141	51.7
BAS0353	52.2
BAS2734	52.6
BAS5310	52.6
BAS4996	52.7
BAS3647	52.7
BAS3851	52.9
BAS0241	53.1
BAS1019	53.4
BAS2903	53.4
BAS3925	53.5
BAS3440	53.5
BAS0510	53.7
BAS4448	54
BAS2095	54
BAS3810	54.3
BAS3050	54.6
BAS5016	54.7
BAS3398	54.7
BAS0584	54.8
BAS1285	55
BAS4033	55.4
BAS0232	55.5
BAS3479	55.5
BAS4328	55.8
BAS1312	56
BAS3022	56
BAS4197	56.1
BAS2004	56.1
BAS3986	56.2
BAS0712	56.7
BAS0006	56.7
BAS5334	56.8
BAS2083	57.6
BAS0292	57.7
BAS3188	57.9
BAS3215	57.9
BAS3761	58
BAS0284	58.4
BAS0837	58.9
BAS0687	59
BAS2122	59.3
BAS4843	59.4
BAS4185	59.8
BAS1052	60
BAS3588	60.1
BAS4004	60.1
BAS4138	60.2
BAS5035	60.8
BAS4325	61.1
BAS4190	61.2
BAS1427	61.3
BAS4855	61.3
BAS2447	61.4
BAS2021	61.5
BAS0045	61.7
BAS1197	61.8
BAS4785	62.2
BAS4612	62.5
BAS3271	62.9
BAS4879	63.1
BAS1838	63.2
BAS3887	63.4
BAS1426	63.5
BAS0681	64.1
BAS2507	64.2
BAS1317	65
BAS4852	65.2
BAS1215	65.4
BAS4808	65.5
BAS4437	65.9
BAS2069	66
BAS5120	66.6
BAS0581	66.6
BAS0315	66.6
BAS0032	66.7
BAS5272	67.3
BAS0999	67.4
BAS3463	68.1
BAS2453	68.3
BAS1217	68.4
BAS0961	68.5
BAS0282	68.8
BAS3468	69.1
BAS3683	69.3
BAS2206	69.3
BAS2208	69.7
BAS0915	69.8
BAS0607	70
BAS0951	70
BAS1202	70
BAS5015	70.2
BAS1432	70.3
BAS3394	70.8
BAS0997	71.3
BAS4338	71.4
BAS2138	71.5
BAS3670	72
BAS1036	72
BAS4831	72.2
BAS2641	72.3
BAS1016	72.6
BAS5116	72.6
BAS1250	72.6
BAS4083	73.2
BAS3875	73.9
BAS4231	74
BAS4298	74.3
BAS3063	74.4
BAS5114	74.7
BAS1135	74.8
BAS1101	75.1
BAS4753	75.4
BAS2747	75.7
BAS3991	75.7
BAS4556	75.7
BAS2100	75.9
BAS3621	76.1
BAS0392	76.6
BAS3863	77
BAS3653	77.1
BAS5218	77.3
BAS3379	77.5
BAS2084	77.7
BAS3960	78.8
BAS4587	79.1
BAS3985	79.3
BAS3856	79.9
BAS3717	80.5
BAS4542	81.3
BAS3963	81.6
BAS4050	81.7
BAS2044	81.9
BAS4021	82.4
BAS0499	83.8
BAS2376	84.4
BAS1924	84.5
BAS2277	85.1
BAS4540	85.1
BAS3676	85.6
BAS3619	85.7
BAS5137	85.9
BAS4931	85.9
BAS1421	86.2
BAS1723	86.4
BAS2334	86.5
BAS2663	87
BAS2941	87.1
BAS4161	88
BAS4501	88.3
BAS1688	88.8
BAS0001	89
BAS4186	89.2
BAS5204	90.8
BAS4303	91.6
BAS4689	91.7
BAS3637	91.7
BAS0066	92.1
BAS1000	92.2
BAS4101	92.5
BAS0947	93.2
BAS5178	94.3
BAS5045	94.3
BAS4415	94.4
BAS4957	94.5
BAS4220	95.3
BAS5333	95.7
BAS4773	95.8
BAS1137	96.2
BAS2448	96.3
BAS0942	96.6
BAS4956	96.6
BAS1386	97
BAS3755	97.3
BAS4068	98
BAS1763	98.5
BAS1465	98.7
BAS1759	98.8
BAS0850	99
BAS3955	99.1
BAS4199	100
BAS0409	100
BAS3739	101
BAS0941	102
BAS4685	103
BAS5103	103
BAS0291	103
BAS0249	103
BAS1017	104
BAS4193	104
BAS1316	105
BAS1898	105
BAS4329	105
BAS4346	106
BAS3735	106
BAS0240	106
BAS4494	106
BAS5003	107
BAS4001	107
BAS2560	109
BAS5281	109
BAS1961	109
BAS4595	109
BAS5181	109
BAS4840	110
BAS0071	110
BAS2212	112
BAS0960	112
BAS0516	113
BAS1936	114
BAS4218	115
BAS4583	117
BAS2081	119
BAS4579	120
BAS0390	121
BAS3707	121
BAS0410	122
BAS1099	122
BAS4917	122
BAS0976	122
BAS3998	122
BAS3441	123
BAS3696	123
BAS4670	124
BAS4312	124
BAS1915	125
BAS1971	125
BAS4180	126
BAS0555	129
BAS2942	129
BAS0057	130
BAS4273	130
BAS1177	130
BAS0046	131
BAS1260	131
BAS2762	131
BAS0336	132
BAS2367	133
BAS3965	133
BAS0626	133
BAS5326	133
BAS3721	138
BAS1519	138
BAS0337	138
BAS5219	139
BAS1054	140
BAS4334	140
BAS4061	141
BAS3737	141
BAS4560	142
BAS4792	142
BAS3900	142
BAS2320	143
BAS0288	143
BAS5309	143
BAS3651	144
BAS2205	144
BAS0669	145
BAS0498	145
BAS1372	146
BAS0552	149
BAS1894	149
BAS4358	150
BAS1431	150
BAS2002	151
BAS1415	151
BAS5185	152
BAS2966	153
BAS3622	154
BAS1049	154
BAS1414	155
BAS4326	155
BAS4426	156
BAS3886	157
BAS1454	157
BAS4687	159
BAS2990	159
BAS3850	160
BAS4377	161
BAS3702	163
BAS0287	164
BAS3648	165
BAS4028	165
BAS5128	166
BAS0567	166
BAS1195	167
BAS5224	167
BAS2914	168
BAS4860	168
BAS3884	169
BAS0280	169
BAS4367	171
BAS3958	171
BAS0827	172
BAS2371	173
BAS2827	173
BAS2286	173
BAS3689	173
BAS4187	174
BAS0037	174
BAS4919	175
BAS0586	175
BAS4031	177
BAS4003	177
BAS4281	178
BAS5038	178
BAS4212	179
BAS1267	179
BAS3627	180
BAS3769	180
BAS4538	182
BAS1255	182
BAS0278	183
BAS3115	184
BAS4578	185
BAS0331	186
BAS4196	187
BAS1194	188
BAS4168	191
BAS4240	191
BAS2628	191
BAS2800	192
BAS1310	194
BAS4455	194
BAS5034	196
BAS4234	197
BAS4071	197
BAS4591	197
BAS0043	200
BAS2693	202
BAS1325	203
BAS0808	204
BAS3708	205
BAS4797	205
BAS5213	207
BAS3723	208
BAS4194	209
BAS4497	209
BAS3964	211
BAS3868	211
BAS1021	213
BAS0086	214
BAS4472	215
BAS1231	215
BAS0474	215
BAS1086	217
BAS1357	217
BAS4790	217
BAS0641	218
BAS0836	218
BAS1625	219
BAS0091	222
BAS3681	222
BAS1270	223
BAS2268	223
BAS1366	224
BAS0340	224
BAS0405	225
BAS4936	227
BAS4877	228
BAS3996	229
BAS5239	229
BAS3654	230
BAS4824	231
BAS3984	232
BAS3997	232
BAS1369	236
BAS0076	236
BAS1090	238
BAS3742	239
BAS3072	239
BAS1419	240
BAS4637	240
BAS5004	243
BAS5266	243
BAS5187	243
BAS3896	244
BAS2375	247
BAS2640	247
BAS4589	248
BAS0096	250
BAS3193	253
BAS3891	255
BAS3180	256
BAS0197	257
BAS4849	258
BAS0525	259
BAS1471	260
BAS4881	262
BAS3758	263
BAS4373	263
BAS1103	264
BAS3071	264
BAS4297	265
BAS2190	267
BAS1475	268
BAS1959	268
BAS0238	270
BAS0131	271
BAS0048	272
BAS1096	273
BAS4450	273
BAS2781	273
BAS1673	274
BAS4276	274
BAS1254	278
BAS0851	280
BAS2177	280
BAS5160	282
BAS3746	282
BAS5171	288
BAS2209	288
BAS3629	289
BAS0089	289
BAS4575	289
BAS4284	292
BAS2195	292
BAS1682	292
BAS5154	295
BAS2191	296
BAS3644	297
BAS0276	301
BAS5158	302
BAS3268	306
BAS3658	311
BAS1139	312
BAS1269	313
BAS4412	313
BAS1463	319
BAS0314	320
BAS4661	320
BAS0306	322
BAS3411	324
BAS3402	325
BAS4355	325
BAS4270	326
BAS4293	327
BAS1784	329
BAS4268	332
BAS1953	333
BAS1855	336
BAS0578	339
BAS3590	340
BAS5328	342
BAS4853	342
BAS4359	345
BAS1843	345
BAS1637	345
BAS5241	347
BAS4076	348
BAS2738	349
BAS0307	350
BAS0767	352
BAS1076	353
BAS0910	353
BAS3667	353
BAS5182	354
BAS2019	357
BAS4413	357
BAS2776	360
BAS3395	363
BAS4467	368
BAS2174	370
BAS4634	373
BAS3932	374
BAS0087	377
BAS1081	377
BAS4102	377
BAS1839	385
BAS2369	386
BAS0158	387
BAS0286	390
BAS3656	394
BAS0053	395
BAS5040	398
BAS4267	403
BAS1169	406
BAS4065	411
BAS4214	422
BAS2207	428
BAS4471	429
BAS0281	429
BAS0561	431
BAS1176	431
BAS0063	438
BAS0080	439
BAS3335	440
BAS2257	443
BAS2635	445
BAS1842	451
BAS3995	452
BAS0233	454
BAS1186	456
BAS5188	458
BAS4859	462
BAS0283	463
BAS3664	463
BAS2283	464
BAS3179	465
BAS4508	466
BAS4419	466
BAS3623	471
BAS4488	472
BAS4458	476
BAS2192	484
BAS4521	485
BAS0518	486
BAS0623	489
BAS1511	490
BAS2370	494
BAS0387	494
BAS1428	495
BAS2910	496
BAS5159	509
BAS4208	512
BAS0637	514
BAS1620	517
BAS0730	521
BAS5238	525
BAS0768	525
BAS4660	525
BAS4700	527
BAS0978	528
BAS2085	530
BAS3680	535
BAS3666	535
BAS2825	536
BAS2188	537
BAS3893	538
BAS3093	543
BAS0505	544
BAS3757	546
BAS2193	548
BAS4847	549
BAS1840	551
BAS4477	552
BAS0102	554
BAS4935	560
BAS1378	564
BAS3912	564
BAS4454	568
BAS1811	571
BAS1048	572
BAS4468	577
BAS2189	586
BAS3408	599
BAS0155	602
BAS1859	613
BAS4748	619
BAS4986	620
BAS5169	628
BAS1071	629
BAS3549	630
BAS4645	632
BAS4067	633
BAS0341	633
BAS4476	634
BAS1928	639
BAS4085	639
BAS1297	642
BAS2554	643
BAS5048	645
BAS4850	646
BAS5117	647
BAS4066	649
BAS1401	659
BAS2313	659
BAS5192	668
BAS4369	669
BAS1230	683
BAS1196	690
BAS3650	691
BAS4275	695
BAS4052	701
BAS0820	713
BAS4131	717
BAS4821	736
BAS4486	742
BAS4420	749
BAS3701	751
BAS1812	765
BAS3328	767
BAS0955	768
BAS0305	772
BAS4478	774
BAS1467	788
BAS3125	790
BAS1105	791
BAS2153	793
BAS5164	794
BAS4851	795
BAS4323	798
BAS5156	806
BAS2128	819
BAS5320	823
BAS0279	825
BAS0160	832
BAS3859	838
BAS1114	841
BAS6001	843
BAS4762	863
BAS0275	875
BAS1770	876
BAS4350	892
BAS4537	892
BAS4871	892
BAS5000	899
BAS3470	911
BAS0277	913
BAS0103	915
BAS2834	917
BAS1227	918
BAS3675	925
BAS4784	953
BAS4875	954
BAS5226	960
BAS3922	972
BAS0766	997
BAS0067	1000
BAS4129	1009
BAS0841	1034
BAS4836	1052
BAS1871	1060
BAS5007	1066
BAS1104	1072
BAS3687	1073
BAS3880	1092
BAS0137	1092
BAS0022	1097
BAS3348	1122
BAS0254	1157
BAS0064	1192
BAS0191	1195
BAS5325	1205
BAS4993	1234
BAS0329	1278
BAS4087	1286
BAS0285	1288
BAS0974	1298
BAS5157	1323
BAS0013	1328
BAS3403	1345
BAS0386	1353
BAS4324	1362
BAS1512	1380
BAS5180	1384
BAS4934	1387
BAS4340	1409
BAS2911	1431
BAS4493	1440
BAS3679	1456
BAS2748	1477
BAS0481	1477
BAS1144	1490
BAS3625	1495
BAS3972	1529
BAS4914	1553
BAS4789	1583
BAS0047	1593
BAS3957	1603
BAS2964	1620
BAS2008	1623
BAS4283	1626
BAS2106	1635
BAS4535	1656
BAS5242	1656
BAS3652	1675
BAS6002	1685
BAS4370	1727
BAS4424	1760
BAS0036	1763
BAS4311	1773
BAS4926	1796
BAS1229	1811
BAS0049	1865
BAS1148	1885
BAS4130	1900
BAS3747	1903
BAS3643	1905
BAS0133	1921
BAS0119	1931
BAS3686	1945
BAS0011	1999
BAS4987	2043
BAS4469	2062
BAS0144	2078
BAS0138	2106
BAS1050	2126
BAS0081	2268
BAS4342	2355
BAS5165	2381
BAS3881	2465
BAS3882	2467
BAS4492	2494
BAS5300	2519
BAS3409	2527
BAS1425	2528
BAS5184	2540
BAS4767	2557
BAS4417	2711
BAS0126	2717
BAS3634	2762
BAS1408	2798
BAS4418	2804
BAS4523	2894
BAS2111	2925
BAS0097	2935
BAS1225	3029
BAS4487	3034
BAS0099	3051
BAS4988	3066
BAS0295	3124
BAS4870	3213
BAS0113	3214
BAS3695	3234
BAS0098	3279
BAS0124	3286
BAS0127	3333
BAS0493	3345
BAS4221	3366
BAS0015	3393
BAS0109	3450
BAS5155	3521
BAS3691	3834
BAS3883	4032
BAS0107	4063
BAS4070	4084
BAS1392	4088
BAS0116	4105
BAS0135	4124
BAS4953	4217
BAS0118	4351
BAS3677	4453
BAS0110	4476
BAS4470	4633
BAS0111	4958
BAS3678	5037
BAS0128	5039
BAS0106	5077
BAS0115	5169
BAS2213	5273
BAS0121	5507
BAS3959	5754
BAS4213	5826
BAS0125	6020
BAS5039	6465
BAS0117	6563
BAS0122	6665
BAS4754	6904
BAS0252	6955
BAS0129	7469
BAS2036	7505
BAS0394	7835
BAS4177	8197
BAS0120	8439
BAS5327	9188
BAS4985	10309
BAS0143	10640
BAS0114	10934
BAS3574	11419
BAS2908	11507
BAS0330	11674
BAS0253	12429
BAS4554	12554
BAS0105	13125
BAS1844	13424
BAS0112	15348
BAS0108	16800
BAS0100	17760
BAS1420	17913
BAS0842	18613
BAS0136	19905
BAS0060	20308
BAS0123	20365
BAS3659	24714
BAS0815	27004
BAS4989	33796
BAS4544	36520
BAS3333	41176

## Sheet: Nmeningitidis
GeneID	abundance			Site	Nuc	N_used	N_expected	Ratio
NMB1053	100067			1	U	8	34.897	0.229246
NMB2039	83778			2	A	52	69.794	0.74505
NMB0382	79677			3	G	111	104.691	1.06026
NMB1429	47205			4	A	197	139.587	1.41131
NMB0663	22301			5	A	273	162.407	1.68096
NMB0026	20767			6	A	320	174.561	1.83317
NMB0018	20521			7	G	307	177.441	1.73015
NMB0124	17939			8	G	294	178.122	1.65055
NMB0139	17776			9	A	273	178.122	1.53266
NMB0205	16423			10	G	125	177.441	0.70446
NMB1972	13042			11	G	50	174.561	0.286433	GAUCA	0.133545
NMB0546	12553			12	U	27	162.407	0.166249	CCUCC	1.18085
NMB1870	12090			13	G	16	139.587	0.114624	Extended	1.16
NMB0763	11010			14	A	15	104.691	0.143279
NMB1035	10834			15	U	13	69.794	0.186262
NMB2095	9138			16	C	2	34.897	0.0573115
NMB0155	8639
NMB0145	8231
NMB0634	7836
NMB0954	7299
NMB1574	7284
NMB1124	6530
NMB1162	6530
NMB0960	6468
NMB1309	6341
NMB1934	6310
NMB2159	6120
NMB0345	6113
NMB1164	5941
NMB1126	5941
NMB1341	5883
NMB0946	5698
NMB0959	5626
NMB1936	5600
NMB1518	4729
NMB0019	4563
NMB0021	4545
NMB1985	4482
NMB1710	4241
NMB1055	4163
NMB0168	4146
NMB1333	4144
NMB0586	3918
NMB1538	3648
NMB1285	3605
NMB0937	3600
NMB1342	3445
NMB1963	3431
NMB2091	3417
NMB0335	3409
NMB0041	3387
NMB0604	3322
NMB0700	3237
NMB1604	3141
NMB0138	3030
NMB1849	2971
NMB1332	2875
NMB1620	2838
NMB1652	2828
NMB1213	2772
NMB0133	2739
NMB0929	2696
NMB1279	2655
NMB0143	2655
NMB0540	2650
NMB2139	2604
NMB0928	2603
NMB0783	2552
NMB0214	2539
NMB1379	2520
NMB0128	2520
NMB0167	2501
NMB1057	2499
NMB1998	2489
NMB1497	2478
NMB0550	2452
NMB0703	2451
NMB0707	2447
NMB1869	2441
NMB1968	2430
NMB0137	2419
NMB0641	2392
NMB0203	2363
NMB1864	2363
NMB0944	2356
NMB0281	2334
NMB1460	2319
NMB1796	2278
NMB0956	2197
NMB0456	2179
NMB0631	2150
NMB0088	2094
NMB1855	2078
NMB0723	2019
NMB0154	2015
NMB0873	1991
NMB0132	1975
NMB0684	1970
NMB1445	1936
NMB0207	1921
NMB1567	1885
NMB2005	1868
NMB1390	1852
NMB0461	1814
NMB2102	1727
NMB0530	1711
NMB1369	1699
NMB1609	1643
NMB1323	1622
NMB0165	1614
NMB0340	1609
NMB1572	1589
NMB0006	1581
NMB1372	1573
NMB1559	1569
NMB0179	1558
NMB1921	1537
NMB2079	1535
NMB1324	1514
NMB1201	1484
NMB0801	1451
NMB0181	1449
NMB0136	1438
NMB0336	1433
NMB0157	1432
NMB0964	1424
NMB1584	1423
NMB0957	1416
NMB0109	1405
NMB0325	1376
NMB1073	1346
NMB1394	1323
NMB0768	1299
NMB0575	1291
NMB1313	1270
NMB0875	1264
NMB0010	1262
NMB0068	1261
NMB0920	1251
NMB1440	1244
NMB0955	1243
NMB1969	1242
NMB0671	1235
NMB0622	1219
NMB0052	1217
NMB0446	1207
NMB0142	1206
NMB2068	1196
NMB1030	1188
NMB2147	1180
NMB0149	1171
NMB0131	1170
NMB1789	1162
NMB0595	1161
NMB1902	1149
NMB1320	1147
NMB1823	1139
NMB0427	1137
NMB0724	1133
NMB1573	1124
NMB1565	1112
NMB0174	1108
NMB1557	1103
NMB0554	1097
NMB1581	1092
NMB1468	1078
NMB1678	1075
NMB0219	1070
NMB0618	1067
NMB0787	1055
NMB1031	1045
NMB0462	1039
NMB0758	1031
NMB1060	997
NMB1301	995
NMB0493	988
NMB0359	979
NMB1768	978
NMB0401	971
NMB0351	956
NMB1457	946
NMB0699	921
NMB0617	906
NMB0574	905
NMB2056	900
NMB0127	884
NMB1392	879
NMB0870	875
NMB1580	874
NMB1648	866
NMB1946	862
NMB1472	858
NMB0814	833
NMB1199	817
NMB0469	810
NMB0204	806
NMB0682	804
NMB0407	801
NMB1344	796
NMB0845	795
NMB0876	790
NMB1207	782
NMB0609	775
NMB1150	761
NMB1188	761
NMB1498	747
NMB0810	732
NMB0326	729
NMB0995	727
NMB0804	726
NMB1230	707
NMB0637	706
NMB2060	694
NMB1047	692
NMB1384	678
NMB0294	676
NMB1874	672
NMB0652	670
NMB0375	670
NMB1839	669
NMB1280	666
NMB1475	665
NMB1252	661
NMB1996	655
NMB1293	654
NMB0585	652
NMB0662	647
NMB2154	646
NMB1283	628
NMB2151	625
NMB1371	615
NMB1976	614
NMB1949	611
NMB2101	607
NMB0848	603
NMB0284	603
NMB0033	600
NMB1366	598
NMB0466	591
NMB0169	590
NMB0774	584
NMB0044	579
NMB1814	569
NMB1616	564
NMB1995	562
NMB0625	562
NMB2000	559
NMB0180	556
NMB1805	552
NMB1428	549
NMB1810	544
NMB1415	542
NMB0106	541
NMB1677	532
NMB0071	531
NMB1212	524
NMB1393	522
NMB0781	519
NMB0321	517
NMB1612	515
NMB1240	507
NMB0828	500
NMB2094	498
NMB1579	496
NMB1471	479
NMB1127	478
NMB1165	478
NMB0711	477
NMB0668	461
NMB0478	456
NMB1799	438
NMB1640	434
NMB1861	431
NMB0182	431
NMB1360	429
NMB1084	426
NMB0872	422
NMB0589	416
NMB2085	414
NMB0884	412
NMB1347	391
NMB0803	391
NMB2086	383
NMB1897	378
NMB0387	375
NMB0110	375
NMB0353	373
NMB1405	371
NMB0337	369
NMB2129	368
NMB1812	366
NMB1594	359
NMB0195	359
NMB0352	358
NMB0729	357
NMB0537	354
NMB0111	353
NMB0015	353
NMB0029	351
NMB1554	349
NMB0390	348
NMB0329	347
NMB1613	337
NMB1305	335
NMB0283	333
NMB0161	331
NMB0170	324
NMB1506	324
NMB0623	320
NMB1854	318
NMB0196	318
NMB0802	314
NMB0460	314
NMB0561	313
NMB0851	311
NMB1339	310
NMB1395	297
NMB2057	293
NMB1898	293
NMB1505	292
NMB0148	291
NMB0815	288
NMB0994	285
NMB0081	280
NMB1044	278
NMB1037	276
NMB1476	272
NMB1668	271
NMB1310	268
NMB1916	265
NMB0476	264
NMB1592	263
NMB1256	259
NMB0107	259
NMB0278	259
NMB0871	258
NMB0543	257
NMB0680	256
NMB1356	254
NMB1887	253
NMB1953	251
NMB0431	247
NMB0292	245
NMB1714	239
NMB0118	237
NMB1684	236
NMB1959	231
NMB2048	230
NMB1358	228
NMB1595	224
NMB1920	224
NMB0490	223
NMB0435	220
NMB1070	215
NMB0894	213
NMB0823	210
NMB0464	210
NMB1680	208
NMB0786	208
NMB1988	204
NMB1029	203
NMB2083	202
NMB2093	201
NMB0426	198
NMB1288	190
NMB1694	179
NMB1530	175
NMB1994	175
NMB0983	174
NMB2103	162
NMB1679	157
NMB1833	154
NMB2155	153
NMB2096	151
NMB1231	145
NMB1064	145
NMB0947	144
NMB1425	142
NMB2061	136
NMB0011	133
NMB0943	133
NMB0323	129
NMB0690	125
NMB1838	125
NMB0790	124
NMB0379	124
NMB1019	123
NMB1577	121
NMB0878	118
NMB0313	108
NMB1582	108
NMB0626	106
NMB0720	98.3
NMB1982	95.5
NMB1169	93
NMB1131	93
NMB0836	88.8
NMB0051	87.2
NMB2074	86.4
NMB0997	82
NMB1046	80
NMB0950	79.3
NMB1233	74.6
NMB0030	73.9
NMB0497	71.5
NMB1779	71.2
NMB1291	66.8
NMB0728	65.1
NMB0212	51.3
NMB1720	49.2
NMB1827	31.3
NMB1214	25.1

## Sheet: Cjejuni
SeqName	abundance		Site	Nuc	N_used	N_expected		Ratio
Cj1590	2.54			1	G	96	82.685	1.16103
Cj0017c	2.55			2	A	385	165.37	2.32811
Cj0613	2.88			3	A	618	248.055	2.49138
Cj1078	3.93			4	A	682	330.739	2.06205
Cj1668c	4.64			5	G	666	389.606	1.70942
Cj1178c	7.09			6	G	614	423.773	1.44889
Cj1708c	8.35			7	A	522	433.273	1.20478
Cj0845c	8.43			8	G	256	433.273	0.590851
Cj0470	10.8			9	G	98	423.773	0.231256
Cj1695c	10.8			10	U	83	389.606	0.213036
Cj1308	10.8			11	G	53	330.739	0.160247	GAUCA	0.15609
Cj0240c	12.8			12	A	41	248.055	0.165286	CCUCC	1.03704
Cj0758	13			13	U	26	165.37	0.157223	Extended	2.01064
Cj1505c	13			14	C	7	82.685	0.0846586
Cj0370	13.2
Cj0373	13.9
Cj1259	14.4
Cj0531	15.7
Cj0384c	16.7
Cj0235c	17.7
Cj1051c	18
Cj1565c	19.1
Cj1031	19.5
Cj1279c	19.8
Cj1672c	20.1
Cj0041	20.7
Cj0921c	21
Cj0476	21.2
Cj0027	21.7
Cj1190c	23.6
Cj0206	23.8
Cj0238	24.6
Cj0239c	24.7
Cj0108	25.1
Cj0411	25.3
Cj1472c	26.3
Cj1074c	27.2
Cj0101	27.8
Cj1228c	28
Cj1047c	28.4
Cj0276	28.5
Cj0833c	29.2
Cj0884	29.5
Cj0638c	30.3
Cj1073c	30.3
Cj1428c	30.4
Cj1261	30.5
Cj1403c	30.7
Cj0882c	30.8
Cj0194	30.9
Cj1060c	31.1
Cj0168c	31.3
Cj0233c	31.3
Cj1005c	34.1
Cj1496c	34.7
Cj0390	34.8
Cj0063c	34.8
Cj0853c	35.2
Cj0992c	35.5
Cj1243	35.6
Cj0595c	35.8
Cj0265c	36.1
Cj0649	36.3
Cj1357c	36.7
Cj0082	36.7
Cj0498	37.1
Cj1299	37.4
Cj0475	37.6
Cj1473c	37.9
Cj1338c	38.2
Cj0766c	39.3
Cj0392c	39.4
Cj1058c	39.5
Cj1462	39.7
Cj0561c	40.6
Cj0899c	41.7
Cj1408	42.2
Cj0509c	42.3
Cj0131	44
Cj0294	44.6
Cj0328c	44.9
Cj0604	45.1
Cj0543	45.6
Cj0106	45.7
Cj0779	47.3
Cj0800c	48.4
Cj1219c	49
Cj0283c	49.8
Cj0147c	50.5
Cj1312	51.3
Cj0439	51.6
Cj0322	52.1
Cj1098	53.1
Cj0573	53.9
Cj1008c	54.1
Cj0526c	54.2
Cj0342c	54.4
Cj0088	55.7
Cj1511c	56.3
Cj1689c	57.4
Cj1402c	57.7
Cj0234c	57.8
Cj0345	57.9
Cj1621	58.1
Cj0038c	58.1
Cj1661	58.4
Cj0955c	59.1
Cj0152c	59.5
Cj0516	59.6
Cj1183c	60.1
Cj0701	61.5
Cj0387	61.7
Cj1230	61.8
Cj0333c	62.3
Cj0034c	63.9
Cj1355	64
Cj0716	64.2
Cj0588	65.5
Cj0124c	67.5
Cj1227c	67.9
Cj1486c	68.5
Cj1632c	68.5
Cj0019c	68.9
Cj1405	70
Cj0412	70.1
Cj0115	70.9
Cj1594	71.1
Cj1598	71.3
Cj0975	71.4
Cj0610c	71.5
Cj0829c	71.9
Cj1464	72.6
Cj0597	73.6
Cj0437	74
Cj0117	74.1
Cj0537	74.2
Cj0458c	74.5
Cj1690c	75.1
Cj0442	75.4
Cj1054c	75.7
Cj0302c	75.8
Cj0890c	75.8
Cj1175c	76.3
Cj0547	76.3
Cj1180c	76.8
Cj0562	78
Cj1546	79.1
Cj0184c	79.5
Cj1080c	81.2
Cj0962	82.4
Cj0068	82.6
Cj0162c	83.1
Cj1386	83.2
Cj0007	83.2
Cj0915	85.5
Cj1351	86.7
Cj1673c	90
Cj0664c	90.2
Cj0474	90.3
Cj0279	90.6
Cj1487c	91.2
Cj0933c	93.5
Cj0579c	93.9
Cj0653c	94.1
Cj0606	95
Cj0453	95.1
Cj0402	95.6
Cj1506c	95.8
Cj0365c	96.7
Cj1085c	98.5
Cj1176c	101
Cj1041c	101
Cj0166	102
Cj0367c	103
Cj1300	103
Cj0136	104
Cj0630c	105
Cj1192	106
Cj1478c	107
Cj0299	107
Cj1550c	108
Cj1273c	109
Cj1034c	110
Cj0635	112
Cj1397	112
Cj0142c	115
Cj1592	116
Cj0024	116
Cj1681c	117
Cj1000	118
Cj1549c	118
Cj0668	119
Cj0098	121
Cj1246c	122
Cj1641	124
Cj1328	124
Cj1023c	126
Cj0013	126
Cj1272c	126
Cj1725	127
Cj1271c	127
Cj1181c	128
Cj0667	128
Cj0960c	128
Cj0964	128
Cj1169c	129
Cj1420c	129
Cj0893c	130
Cj0275	130
Cj1044c	130
Cj1540	132
Cj1415c	132
Cj1611	133
Cj1012c	134
Cj0091	136
Cj1275c	136
Cj1597	137
Cj1388	138
Cj0813	139
Cj0732	141
Cj0441	142
Cj1191c	144
Cj0104	145
Cj0551	148
Cj1096c	152
Cj1649	153
Cj0520	154
Cj1099	154
Cj1633	154
Cj0381c	154
Cj0473	156
Cj1573c	156
Cj0834c	157
Cj0026c	158
Cj0591c	159
Cj0103	161
Cj0726c	161
Cj1134	163
Cj1456c	164
Cj1608	165
Cj1726c	167
Cj0081	169
Cj1313	170
Cj0389	173
Cj0089	174
Cj0780	176
Cj0594c	176
Cj1107	177
Cj1349c	179
Cj1693c	181
Cj0650	182
Cj0175c	184
Cj0329c	184
Cj1052c	184
Cj0581	186
Cj1102	186
Cj1021c	187
Cj0663c	187
Cj1106	187
Cj0010c	189
Cj1234	189
Cj0775c	189
Cj1385	191
Cj1090c	191
Cj1523c	193
Cj1624c	194
Cj0045c	196
Cj0001	196
Cj1124c	196
Cj1617	202
Cj1356c	202
Cj1104	203
Cj1197c	205
Cj0059c	208
Cj1238	216
Cj0398	218
Cj1201	218
Cj1162c	219
Cj1229	219
Cj1593	223
Cj1056c	223
Cj0324	223
Cj0414	223
Cj0466	224
Cj1083c	228
Cj1721c	228
Cj1536c	232
Cj1379	232
Cj1091c	238
Cj0448c	239
Cj1616	239
Cj1571c	242
Cj1577c	243
Cj0424	243
Cj0518	246
Cj0094	247
Cj0293	248
Cj0471	249
Cj0892c	250
Cj1088c	250
Cj0420	251
Cj0491	255
Cj0110	261
Cj0092	261
Cj1291c	264
Cj0319	264
Cj0965c	265
Cj0112	268
Cj0624	269
Cj0533	269
Cj1580c	269
Cj1700c	271
Cj1101	272
Cj0923c	272
Cj0805	273
Cj0443	276
Cj1454c	277
Cj1479c	280
Cj1339c	280
Cj0961c	288
Cj1170c	288
Cj0950c	297
Cj0207	300
Cj0838c	300
Cj1647	303
Cj1027c	305
Cj1642	307
Cj0181	314
Cj0277	314
Cj0377	316
Cj1445c	317
Cj0799c	325
Cj0769c	325
Cj0327	327
Cj0648	328
Cj1703c	331
Cj0151c	331
Cj1697c	332
Cj0011c	332
Cj1264c	333
Cj0922c	334
Cj0406c	335
Cj1644	336
Cj0143c	337
Cj1635c	340
Cj0259	340
Cj1406c	344
Cj0692c	344
Cj1329	347
Cj0295	351
Cj0771c	351
Cj0944c	351
Cj1394	353
Cj0058	353
Cj0532	355
Cj0932c	361
Cj0113	362
Cj1258	364
Cj1547	365
Cj0262c	366
Cj0335	368
Cj1221	369
Cj0536	369
Cj0334	370
Cj1380	371
Cj1359	373
Cj0230c	373
Cj1366c	373
Cj0090	375
Cj0270	376
Cj0450c	379
Cj1685c	380
Cj0945c	381
Cj1269c	382
Cj0422c	383
Cj1290c	385
Cj0913c	391
Cj0454c	391
Cj0858c	397
Cj0862c	399
Cj0574	399
Cj0192c	401
Cj0592c	402
Cj0511	402
Cj0023	403
Cj1453c	407
Cj1626c	409
Cj0584	409
Cj0541	410
Cj1556	414
Cj1701c	415
Cj0626	417
Cj1014c	417
Cj1530	419
Cj0572	424
Cj0156c	426
Cj0085c	426
Cj0431	426
Cj1266c	427
Cj0680c	427
Cj0778	430
Cj1205c	433
Cj1364c	434
Cj1483c	437
Cj0712	439
Cj0821	439
Cj0864	446
Cj1024c	446
Cj0759	448
Cj0644	449
Cj1484c	449
Cj0029	449
Cj0727	452
Cj0505c	454
Cj0687c	459
Cj1184c	459
Cj1477c	459
Cj0696	465
Cj1135	465
Cj1131c	465
Cj1481c	467
Cj0379c	472
Cj0693c	475
Cj1018c	476
Cj0368c	485
Cj0661c	485
Cj0852c	487
Cj0582	487
Cj0396c	487
Cj0902	488
Cj1636c	488
Cj1691c	489
Cj0435	490
Cj0338c	497
Cj0042	501
Cj0627	501
Cj0298c	502
Cj0296c	509
Cj1250	513
Cj1630	513
Cj0075c	516
Cj0936	518
Cj0485	524
Cj1696c	527
Cj1400c	531
Cj0154c	532
Cj0002	533
Cj0757	536
Cj0172c	537
Cj0388	538
Cj0802	540
Cj0576	542
Cj1071	543
Cj1450	544
Cj1489c	544
Cj0538	544
Cj1189c	546
Cj0527c	550
Cj0281c	554
Cj1244	558
Cj1103	559
Cj0129c	563
Cj0355c	564
Cj1332	565
Cj1713	567
Cj1046c	567
Cj0702	569
Cj1130c	571
Cj0183	573
Cj0245	579
Cj0671	584
Cj1327	589
Cj0810	592
Cj1553c	593
Cj1263	603
Cj0956c	607
Cj0460	612
Cj0717	614
Cj1019c	615
Cj1564	616
Cj1381	622
Cj0351	622
Cj0506	629
Cj1382c	633
Cj0064c	638
Cj1198	643
Cj1698c	645
Cj0530	646
Cj1521c	650
Cj1303	659
Cj1688c	661
Cj0632	663
Cj1569c	669
Cj0690c	670
Cj1680c	678
Cj1206c	680
Cj0003	687
Cj0640c	710
Cj0144	715
Cj0339	730
Cj0514	734
Cj0835c	749
Cj0228c	750
Cj0093	754
Cj0598	755
Cj0942c	775
Cj0318	788
Cj0413	788
Cj0261c	788
Cj1699c	790
Cj0636	795
Cj0634	799
Cj1059c	802
Cj0926	804
Cj1153	812
Cj1066	814
Cj1724c	817
Cj0886c	821
Cj1729c	831
Cj0985c	845
Cj0005c	857
Cj1596	871
Cj0812	878
Cj0549	878
Cj0410	886
Cj1435c	897
Cj0200c	905
Cj0284c	906
Cj1648	906
Cj1196c	908
Cj1378	910
Cj0807	919
Cj0352	922
Cj0983	932
Cj0612c	947
Cj1028c	954
Cj1675	963
Cj1011	969
Cj1532	972
Cj0053c	973
Cj0477	974
Cj0824	974
Cj0287c	981
Cj0639c	986
Cj1704c	994
Cj1603	1002
Cj0330c	1015
Cj0349	1015
Cj0159c	1018
Cj1508c	1020
Cj0710	1026
Cj1480c	1048
Cj0883c	1053
Cj1548c	1057
Cj0241c	1098
Cj1156	1101
Cj1595	1102
Cj1139c	1103
Cj0504c	1104
Cj0358	1105
Cj1108	1109
Cj0534	1112
Cj1694c	1116
Cj0374	1117
Cj1117c	1120
Cj1284	1126
Cj1032	1135
Cj0596	1144
Cj1645	1156
Cj0012c	1167
Cj0264c	1177
Cj0857c	1178
Cj0906c	1182
Cj0060c	1188
Cj1072	1217
Cj0169	1226
Cj1490c	1240
Cj0393c	1249
Cj0599	1256
Cj1515c	1261
Cj1719c	1272
Cj0039c	1289
Cj0889c	1289
Cj0451	1320
Cj1248	1345
Cj0854c	1346
Cj1116c	1350
Cj0688	1352
Cj0271	1354
Cj0492	1367
Cj1451	1378
Cj1202	1389
Cj1563c	1393
Cj0479	1396
Cj0633	1400
Cj1702c	1407
Cj1304	1434
Cj1710c	1436
Cj0198c	1437
Cj0097	1462
Cj0545	1469
Cj0503c	1480
Cj0469	1485
Cj0037c	1486
Cj0714	1491
Cj1070	1496
Cj0548	1551
Cj1581c	1553
Cj0785	1566
Cj0146c	1579
Cj1410c	1596
Cj0818	1597
Cj0332c	1608
Cj0409	1618
Cj1494c	1644
Cj1157	1650
Cj0497	1655
Cj1224	1680
Cj0311	1681
Cj0515	1683
Cj0585	1710
Cj1203c	1716
Cj1120c	1734
Cj1195c	1740
Cj1455	1776
Cj0105	1783
Cj0137	1784
Cj0616	1795
Cj0507	1802
Cj0542	1804
Cj1491c	1870
Cj0863c	1880
Cj0720c	1898
Cj1265c	1910
Cj0686	1911
Cj1240c	1916
Cj0512	1921
Cj0662c	1924
Cj0888c	1937
Cj0493	1969
Cj0320	1972
Cj1591	2005
Cj1001	2028
Cj1110c	2033
Cj0637c	2045
Cj1476c	2046
Cj1637c	2055
Cj0102	2058
Cj0765c	2064
Cj0954c	2118
Cj1188c	2127
Cj0415	2128
Cj0244	2165
Cj0559	2175
Cj1094c	2207
Cj0979c	2217
Cj0704	2218
Cj1345c	2232
Cj0665c	2238
Cj0285c	2245
Cj1223c	2252
Cj0251c	2261
Cj0642	2282
Cj1255	2286
Cj1109	2294
Cj0107	2324
Cj0066c	2334
Cj1614	2339
Cj0776c	2387
Cj0383c	2408
Cj0366c	2441
Cj1686c	2470
Cj0946	2475
Cj0191c	2569
Cj1253	2588
Cj1461	2593
Cj1118c	2598
Cj0734c	2616
Cj1444c	2673
Cj0755	2678
Cj0149c	2688
Cj0043	2710
Cj0155c	2765
Cj0580c	2774
Cj0404	2900
Cj0087	2909
Cj0647	3003
Cj1488c	3054
Cj1042c	3107
Cj0231c	3109
Cj1507c	3188
Cj0086c	3211
Cj0100	3246
Cj0161c	3259
Cj1287c	3299
Cj0160c	3339
Cj0806	3351
Cj1105	3468
Cj1466	3491
Cj1711c	3501
Cj0268c	3513
Cj0927	3513
Cj0127c	3563
Cj1517	3618
Cj1182c	3644
Cj0513	3698
Cj1606c	3726
Cj0842	3769
Cj0224	3775
Cj0145	3854
Cj1498c	3908
Cj1604	3923
Cj1706c	3974
Cj0018c	4005
Cj0793	4068
Cj0709	4091
Cj0193c	4160
Cj1127c	4183
Cj1543	4223
Cj0528c	4278
Cj1601	4333
Cj0519	4469
Cj0783	4488
Cj1209	4545
Cj1061c	4545
Cj0525c	4575
Cj0891c	4582
Cj0998c	4632
Cj0697	4714
Cj1277c	4736
Cj1167	4761
Cj1612	4838
Cj0762c	4878
Cj0896c	4879
Cj1121c	4880
Cj0236c	5040
Cj1707c	5048
Cj0440c	5060
Cj0095	5178
Cj0930	5358
Cj0478	5539
Cj0718	5670
Cj0768c	5770
Cj1705c	5872
Cj1534c	5971
Cj0887c	6116
Cj0111	6133
Cj0929	6993
Cj0426	7022
Cj0269c	7802
Cj0571	8164
Cj1136	8422
Cj1503c	8795
Cj0698	9568
Cj0772c	9572
Cj0031	10735
Cj0061c	10757
Cj1149c	11682
Cj1274c	11684
Cj1026c	13115
Cj0608	13158
Cj0694	14203
Cj1692c	14254
Cj0114	14890
Cj1084c	17030
Cj0304c	17498
Cj0150c	18522
Cj1220	20649
Cj1337	24141
Cj0336c	60446

## Sheet: Ddeserti
Locus_Tag	Proteinn abundance			Site	Nuc	N_used	N_expected	Ratio			2nd peak		Site	Nuc	N_used	N_expected	Ratio
Deide_22590	17865			1	A	84	103.033	0.815273					1	C	42	66.787	0.628865
Deide_21200	9831			2	A	209	206.067	1.01423					2	C	72	133.574	0.539027
Deide_11060	9797			3	A	373	309.1	1.20673					3	U	89	200.36	0.4442
Deide_07720	9209			4	G	598	412.133	1.45099					4	A	104	267.147	0.389299
Deide_02590	9179			5	G	673	474.017	1.41978					5	U	143	304.522	0.469588
Deide_18890	8851			6	A	683	505.433	1.35132					6	A	143	322.772	0.443037
Deide_19110	8511			7	G	692	513.433	1.34779					7	G	158	328.956	0.480307
Deide_13190	8456			8	G	499	505.433	0.987272					8	A	204	330.925	0.616454
Deide_05050	8375			9	U	301	474.017	0.634998					9	A	272	331.433	0.820679
Deide_22580	8364			10	G	210	412.133	0.509544					10	A	392	331.523	1.18242
Deide_12590	8083			11	A	128	309.1	0.414105	GAUCA	0.417521			11	G	577	331.523	1.74045	GAUCA	0.571866
Deide_20610	7934			12	U	57	206.067	0.276609	CCUCC	1.31143			12	G	638	331.433	1.92497	CCUCC	1.80682
Deide_00950	7830			13	C	26	103.033	0.252346	Extended	1.1814			13	A	645	330.925	1.94908	Extended	0.601388
Deide_12690	7348												14	G	652	328.956	1.98203
Deide_18990	7046												15	G	464	322.772	1.43755
Deide_06120	6718												16	U	270	304.522	0.886635
Deide_18970	6718												17	G	187	267.147	0.699989
Deide_19340	6244												18	A	111	200.36	0.554003
Deide_13580	6066												19	U	50	133.574	0.374324
Deide_00990	6051												20	C	23	66.787	0.344378
Deide_12300	5808
Deide_18670	5709
Deide_18920	5525
Deide_11420	5436
Deide_07830	5434
Deide_14320	5367
Deide_01000	5210
Deide_20240	5160
Deide_01470	5059
Deide_18630	5021
Deide_07680	5004
Deide_06150	4959
Deide_07760	4949
Deide_18780	4939
Deide_05920	4795
Deide_16090	4756
Deide_18600	4728
Deide_22060	4681
Deide_02360	4515
Deide_09500	4508
Deide_18900	4505
Deide_19210	4289
Deide_10250	4249
Deide_19550	4212
Deide_05710	4190
Deide_03310	4170
Deide_05790	4150
Deide_11710	4150
Deide_00030	4053
Deide_07920	4026
Deide_18810	4018
Deide_19000	3953
Deide_19570	3948
Deide_18850	3934
Deide_07310	3878
Deide_10791	3839
Deide_06550	3769
Deide_06080	3658
Deide_18640	3522
Deide_03300	3455
Deide_18880	3428
Deide_19640	3416
Deide_03350	3413
Deide_06070	3374
Deide_00960	3364
Deide_13180	3360
Deide_09930	3328
Deide_02140	3290
Deide_00200	3275
Deide_22650	3256
Deide_02580	3186
Deide_06030	3180
Deide_07240	3149
Deide_05750	3129
Deide_21440	3124
Deide_20100	3107
Deide_06020	3085
Deide_11650	3058
Deide_18820	3048
Deide_06050	3036
Deide_06180	3003
Deide_05300	2999
Deide_01720	2955
Deide_20600	2931
Deide_01510	2922
Deide_18950	2880
Deide_05580	2869
Deide_02550	2866
Deide_16140	2787
Deide_10600	2730
Deide_19090	2692
Deide_17290	2538
Deide_00600	2421
Deide_13850	2413
Deide_00710	2375
Deide_02240	2354
Deide_11700	2346
Deide_09040	2326
Deide_06060	2307
Deide_00350	2303
Deide_07540	2277
Deide_20930	2265
Deide_03330	2219
Deide_21050	2219
Deide_18830	2216
Deide_16830	2214
Deide_18680	2197
Deide_00700	2191
Deide_09530	2180
Deide_15920	2140
Deide_16370	2135
Deide_19350	2098
Deide_03280	2086
Deide_09860	2082
Deide_05530	2062
Deide_18660	2060
Deide_06380	2033
Deide_12270	2033
Deide_05640	2030
Deide_05290	2007
Deide_16910	2000
Deide_05540	1992
Deide_20540	1984
Deide_18960	1970
Deide_08080	1959
Deide_18440	1958
Deide_05730	1952
Deide_06790	1943
Deide_12570	1900
Deide_03160	1881
Deide_10650	1874
Deide_13670	1848
Deide_12220	1831
Deide_15650	1810
Deide_14890	1809
Deide_15070	1782
Deide_01590	1750
Deide_11610	1738
Deide_10790	1732
Deide_20316	1732
Deide_00970	1727
Deide_10190	1712
Deide_02880	1700
Deide_20315	1685
Deide_09200	1684
Deide_15340	1670
Deide_18650	1651
Deide_23050	1627
Deide_11390	1618
Deide_20700	1605
Deide_22710	1596
Deide_17160	1585
Deide_10200	1581
Deide_09240	1577
Deide_01200	1555
Deide_01030	1546
Deide_05550	1544
Deide_19790	1529
Deide_00890	1523
Deide_21270	1507
Deide_12450	1494
Deide_11740	1493
Deide_01010	1480
Deide_01560	1473
Deide_21090	1468
Deide_10700	1463
Deide_14600	1460
Deide_09460	1447
Deide_08910	1426
Deide_09080	1424
Deide_11410	1423
Deide_04940	1419
Deide_21970	1414
Deide_20300	1409
Deide_07350	1400
Deide_07620	1381
Deide_01400	1347
Deide_01680	1336
Deide_13880	1336
Deide_09990	1329
Deide_22290	1328
Deide_04660	1317
Deide_11090	1306
Deide_16060	1303
Deide_08760	1296
Deide_04460	1288
Deide_02600	1280
Deide_20080	1275
Deide_12530	1265
Deide_19850	1241
Deide_14420	1239
Deide_13210	1238
Deide_03410	1238
Deide_07550	1231
Deide_18270	1218
Deide_00720	1213
Deide_22010	1205
Deide_05020	1194
Deide_11490	1179
Deide_15450	1168
Deide_05800	1167
Deide_12520	1165
Deide_05430	1165
Deide_12460	1164
Deide_20290	1163
Deide_02180	1160
Deide_15250	1155
Deide_15960	1151
Deide_18760	1149
Deide_07060	1149
Deide_14150	1148
Deide_15190	1146
Deide_17040	1141
Deide_05870	1136
Deide_04850	1131
Deide_05930	1130
Deide_17090	1099
Deide_00780	1083
Deide_00130	1082
Deide_16710	1075
Deide_00040	1072
Deide_21430	1066
Deide_19740	1065
Deide_17210	1058
Deide_12510	1039
Deide_03630	1028
Deide_06210	1023
Deide_20660	1018
Deide_05700	1017
Deide_20317	1011
Deide_18020	1005
Deide_10910	999
Deide_20450	998
Deide_20190	996
Deide_09840	984
Deide_14590	977
Deide_21520	973
Deide_10160	973
Deide_11660	972
Deide_07380	971
Deide_10150	971
Deide_10900	969
Deide_10590	968
Deide_05740	961
Deide_05880	949
Deide_17750	945
Deide_23400	943
Deide_14380	942
Deide_11310	938
Deide_19270	933
Deide_08840	920
Deide_13000	911
Deide_01570	910
Deide_07110	904
Deide_00380	903
Deide_00120	901
Deide_14930	899
Deide_05670	898
Deide_19560	896
Deide_10750	894
Deide_16670	894
Deide_07160	882
Deide_06640	882
Deide_10270	880
Deide_11340	878
Deide_00810	873
Deide_12540	871
Deide_16230	870
Deide_05820	866
Deide_19010	856
Deide_20440	856
Deide_11961	854
Deide_06090	853
Deide_07770	852
Deide_21120	850
Deide_18100	847
Deide_13780	846
Deide_11140	845
Deide_03290	840
Deide_01120	837
Deide_03060	831
Deide_22950	831
Deide_23470	830
Deide_03620	829
Deide_07150	826
Deide_07670	824
Deide_00310	824
Deide_10560	822
Deide_02370	821
Deide_22740	819
Deide_17560	818
Deide_03850	812
Deide_00940	802
Deide_14560	796
Deide_09800	793
Deide_18400	790
Deide_16450	783
Deide_01230	780
Deide_18120	779
Deide_09380	770
Deide_03010	767
Deide_06970	765
Deide_10370	747
Deide_17030	747
Deide_19250	747
Deide_11050	744
Deide_01370	743
Deide_11380	739
Deide_17220	737
Deide_09030	730
Deide_04290	727
Deide_19690	724
Deide_21300	720
Deide_03170	720
Deide_19440	717
Deide_12930	716
Deide_11350	715
Deide_13840	714
Deide_07880	711
Deide_23340	711
Deide_08510	709
Deide_17760	706
Deide_02400	694
Deide_17080	693
Deide_16000	692
Deide_00980	689
Deide_17500	681
Deide_18260	680
Deide_13360	679
Deide_03910	676
Deide_04270	676
Deide_00930	672
Deide_16980	669
Deide_10110	669
Deide_02920	661
Deide_10300	661
Deide_04080	659
Deide_11100	655
Deide_19360	647
Deide_10500	642
Deide_20321	641
Deide_08900	640
Deide_05690	638
Deide_20220	637
Deide_10010	637
Deide_01990	636
Deide_01280	633
Deide_04950	632
Deide_10000	630
Deide_09720	618
Deide_11471	617
Deide_03420	614
Deide_04650	609
Deide_09450	607
Deide_12480	603
Deide_12390	603
Deide_00190	602
Deide_13700	601
Deide_00530	600
Deide_03900	598
Deide_11290	598
Deide_17590	589
Deide_11240	588
Deide_22210	586
Deide_08570	586
Deide_10580	585
Deide_01630	582
Deide_06630	580
Deide_11460	576
Deide_21280	571
Deide_07500	569
Deide_02690	566
Deide_19970	563
Deide_16570	563
Deide_13870	561
Deide_01710	554
Deide_12700	551
Deide_10360	545
Deide_17450	545
Deide_11470	540
Deide_15910	540
Deide_12810	539
Deide_13900	538
Deide_07360	536
Deide_16970	535
Deide_04400	534
Deide_10380	533
Deide_15010	532
Deide_18320	529
Deide_15140	528
Deide_22270	526
Deide_12000	526
Deide_21830	522
Deide_22131	520
Deide_15510	517
Deide_05990	512
Deide_08820	512
Deide_10430	511
Deide_22200	510
Deide_14840	507
Deide_00760	504
Deide_01410	500
Deide_17580	499
Deide_13120	499
Deide_19030	499
Deide_05340	498
Deide_10400	498
Deide_23450	497
Deide_01050	496
Deide_05030	494
Deide_00050	492
Deide_04040	489
Deide_19040	488
Deide_23480	484
Deide_20880	481
Deide_16560	478
Deide_01380	473
Deide_23321	472
Deide_08290	470
Deide_18500	468
Deide_09360	467
Deide_02890	467
Deide_09700	467
Deide_19220	466
Deide_12771	463
Deide_18800	457
Deide_20160	456
Deide_15220	455
Deide_16070	453
Deide_06190	453
Deide_12040	452
Deide_22900	447
Deide_15490	446
Deide_18340	445
Deide_23190	443
Deide_21530	443
Deide_20670	442
Deide_23490	441
Deide_11160	441
Deide_02260	438
Deide_13010	437
Deide_03240	435
Deide_01281	433
Deide_14040	433
Deide_16590	433
Deide_15430	430
Deide_01150	430
Deide_04310	428
Deide_09870	427
Deide_03760	426
Deide_09180	424
Deide_14110	421
Deide_09610	419
Deide_22800	419
Deide_11213	417
Deide_13200	411
Deide_01700	409
Deide_06720	408
Deide_18110	408
Deide_12330	403
Deide_11860	399
Deide_15740	397
Deide_20272	395
Deide_12400	394
Deide_15640	386
Deide_14850	385
Deide_02130	384
Deide_21170	383
Deide_10890	382
Deide_15511	381
Deide_20910	380
Deide_14100	379
Deide_12681	379
Deide_20120	377
Deide_19450	376
Deide_04140	376
Deide_18010	374
Deide_17100	373
Deide_02210	371
Deide_01070	371
Deide_13260	370
Deide_19460	366
Deide_16800	365
Deide_08120	365
Deide_00020	365
Deide_16540	364
Deide_01270	360
Deide_16520	358
Deide_08110	358
Deide_01220	357
Deide_16510	357
Deide_12740	354
Deide_09640	347
Deide_19820	345
Deide_14660	340
Deide_23100	339
Deide_11052	339
Deide_05301	339
Deide_04180	338
Deide_08720	337
Deide_21550	334
Deide_09671	333
Deide_11640	332
Deide_19680	332
Deide_19590	331
Deide_20130	329
Deide_11880	329
Deide_08620	329
Deide_08990	329
Deide_01730	329
Deide_22340	328
Deide_05780	326
Deide_06930	325
Deide_17680	324
Deide_21410	321
Deide_20210	320
Deide_23370	319
Deide_10350	317
Deide_22880	316
Deide_07980	314
Deide_09760	312
Deide_22040	311
Deide_13560	311
Deide_16360	309
Deide_16410	307
Deide_04030	306
Deide_08770	303
Deide_12440	302
Deide_08480	301
Deide_09650	298
Deide_12150	297
Deide_02250	295
Deide_07410	294
Deide_22070	294
Deide_00100	290
Deide_19650	289
Deide_16680	288
Deide_11101	286
Deide_04570	285
Deide_02700	281
Deide_02500	281
Deide_13790	280
Deide_05900	278
Deide_18940	274
Deide_17650	274
Deide_13740	274
Deide_08100	268
Deide_16480	268
Deide_04430	267
Deide_11370	267
Deide_20312	267
Deide_07180	264
Deide_14170	262
Deide_12980	262
Deide_10880	261
Deide_02390	259
Deide_23110	259
Deide_06410	255
Deide_16610	254
Deide_02430	253
Deide_23090	253
Deide_20640	252
Deide_16730	251
Deide_09190	251
Deide_02090	247
Deide_15520	246
Deide_14550	246
Deide_22310	245
Deide_01490	244
Deide_10930	244
Deide_12910	244
Deide_07080	241
Deide_02650	241
Deide_06142	241
Deide_21980	240
Deide_18740	240
Deide_02620	239
Deide_10490	239
Deide_06000	238
Deide_21670	237
Deide_06280	234
Deide_08670	234
Deide_05400	234
Deide_00510	234
Deide_20615	233
Deide_23170	232
Deide_23020	229
Deide_14880	226
Deide_19520	226
Deide_20650	224
Deide_15970	224
Deide_10960	224
Deide_00770	220
Deide_19880	220
Deide_20020	220
Deide_19800	219
Deide_12710	216
Deide_07100	216
Deide_04690	212
Deide_10320	212
Deide_02950	212
Deide_10571	211
Deide_09780	211
Deide_22870	205
Deide_03390	205
Deide_15930	205
Deide_09020	203
Deide_08790	200
Deide_22240	198
Deide_06601	197
Deide_22370	196
Deide_23440	193
Deide_04490	193
Deide_21240	193
Deide_13330	192
Deide_21100	192
Deide_14570	191
Deide_10980	190
Deide_03790	190
Deide_00010	189
Deide_14990	189
Deide_22300	187
Deide_08240	187
Deide_23040	185
Deide_20311	185
Deide_11600	184
Deide_06340	183
Deide_14530	181
Deide_03550	181
Deide_16440	178
Deide_00830	178
Deide_22440	177
Deide_07780	177
Deide_06660	176
Deide_01420	175
Deide_01890	174
Deide_13720	174
Deide_14390	173
Deide_22190	172
Deide_08170	169
Deide_17410	168
Deide_00360	166
Deide_01860	165
Deide_10210	165
Deide_04300	164
Deide_20551	162
Deide_10120	160
Deide_13370	160
Deide_18750	159
Deide_14240	159
Deide_14300	159
Deide_03880	158
Deide_10830	158
Deide_07020	157
Deide_08940	156
Deide_14730	155
Deide_14160	155
Deide_16950	154
Deide_20570	152
Deide_18360	152
Deide_12900	152
Deide_11760	152
Deide_21290	147
Deide_20800	147
Deide_02990	146
Deide_07820	146
Deide_03690	146
Deide_08220	145
Deide_11840	145
Deide_10333	144
Deide_08650	144
Deide_11430	143
Deide_20590	143
Deide_17960	143
Deide_05150	137
Deide_04600	136
Deide_10240	136
Deide_08150	135
Deide_15240	135
Deide_11040	133
Deide_12640	132
Deide_12760	132
Deide_02842	132
Deide_15230	132
Deide_08500	132
Deide_01820	130
Deide_17380	130
Deide_15210	129
Deide_18980	129
Deide_12620	127
Deide_20310	127
Deide_22660	126
Deide_12110	125
Deide_20950	124
Deide_14500	122
Deide_13430	122
Deide_17340	122
Deide_04730	122
Deide_03670	122
Deide_22230	121
Deide_16080	121
Deide_20940	120
Deide_18190	120
Deide_16250	120
Deide_12720	120
Deide_13960	119
Deide_15531	119
Deide_02120	119
Deide_04770	118
Deide_08550	117
Deide_15170	117
Deide_07910	117
Deide_14270	116
Deide_09050	115
Deide_13710	115
Deide_02270	115
Deide_01310	115
Deide_23290	114
Deide_03990	114
Deide_12680	113
Deide_22970	113
Deide_13460	113
Deide_10640	113
Deide_12970	113
Deide_17280	112
Deide_16500	112
Deide_14940	112
Deide_18410	111
Deide_10321	111
Deide_17950	111
Deide_13990	110
Deide_20612	110
Deide_18330	109
Deide_16870	109
Deide_05680	109
Deide_12630	108
Deide_05170	108
Deide_08530	107
Deide_19900	106
Deide_23520	105
Deide_23070	105
Deide_19530	103
Deide_10140	103
Deide_11530	103
Deide_00260	103
Deide_09000	103
Deide_05280	103
Deide_17440	103
Deide_12610	101
Deide_16820	101
Deide_17620	101
Deide_00880	101
Deide_21810	100
Deide_11950	100
Deide_04580	99.9
Deide_11260	99.6
Deide_15090	98.6
Deide_08200	98.5
Deide_21570	98.1
Deide_04260	97.7
Deide_20250	97.4
Deide_03980	97.4
Deide_04910	96.8
Deide_09580	96.6
Deide_16460	96.1
Deide_19430	95
Deide_02930	94.8
Deide_23180	94.6
Deide_09210	94.4
Deide_10340	94
Deide_17060	93.9
Deide_15110	93.5
Deide_01840	93.2
Deide_17270	92.2
Deide_06740	91.4
Deide_00240	90.1
Deide_06420	90
Deide_19600	89.9
Deide_00790	89.4
Deide_14020	88.8
Deide_11750	88.7
Deide_02280	87.5
Deide_21350	87.2
Deide_23250	85.4
Deide_17860	85.3
Deide_12280	85.1
Deide_20271	85
Deide_00390	84.4
Deide_12290	84
Deide_10920	83.6
Deide_07640	82.9
Deide_04890	82.5
Deide_07290	82.5
Deide_10030	81.9
Deide_03720	81.6
Deide_18080	81.6
Deide_02960	81.4
Deide_05510	81.2
Deide_10570	81.1
Deide_23210	81.1
Deide_06920	80.2
Deide_06620	80.1
Deide_14140	80
Deide_05840	79.3
Deide_07320	78.7
Deide_19130	78.6
Deide_03440	78.4
Deide_06200	78.3
Deide_12250	77.5
Deide_00750	77.4
Deide_04410	76.3
Deide_18030	75.5
Deide_06230	75.5
Deide_17010	75.2
Deide_13830	74.2
Deide_03050	73.2
Deide_21840	72.8
Deide_21720	72.7
Deide_05130	72.3
Deide_19260	71.8
Deide_07030	71.7
Deide_10660	71.6
Deide_12580	71.2
Deide_12020	70.9
Deide_05500	70.8
Deide_03090	70.7
Deide_05270	70.1
Deide_17260	69.8
Deide_09620	69.8
Deide_12160	69.6
Deide_18520	69.4
Deide_10480	69.2
Deide_23380	69
Deide_13230	69
Deide_16093	68.7
Deide_11150	68.5
Deide_04840	68.4
Deide_12310	67.9
Deide_08380	67.8
Deide_13470	67.5
Deide_19930	66.7
Deide_18370	66.5
Deide_19770	66.2
Deide_17825	65.5
Deide_19120	65.2
Deide_01300	65.1
Deide_17170	65
Deide_00250	64.8
Deide_20400	64.3
Deide_19100	64.2
Deide_16700	63.8
Deide_15130	63.4
Deide_12800	63.4
Deide_09010	63
Deide_15950	62.4
Deide_20591	61
Deide_09220	60.6
Deide_08140	60.1
Deide_23130	59.4
Deide_13741	58.9
Deide_12430	58.6
Deide_09290	58.2
Deide_14021	57.9
Deide_14980	57.3
Deide_08591	57.3
Deide_06100	57
Deide_18350	56.8
Deide_14760	55.9
Deide_13910	55.8
Deide_16010	55.8
Deide_09420	55.6
Deide_01290	55.4
Deide_14340	55.2
Deide_13280	55.1
Deide_18040	55.1
Deide_08070	54.8
Deide_08540	54.8
Deide_09430	54.7
Deide_08630	54.4
Deide_18560	54.2
Deide_22670	54
Deide_10780	54
Deide_20273	53.7
Deide_09230	53.4
Deide_23230	53.1
Deide_08430	53
Deide_03960	52.3
Deide_07510	52.2
Deide_09770	52
Deide_00140	51.7
Deide_17710	51.6
Deide_02841	50.6
Deide_18530	49.6
Deide_12080	49.6
Deide_04680	49.6
Deide_06600	49.3
Deide_07250	49.1
Deide_05180	48.9
Deide_20070	48.7
Deide_14670	48.3
Deide_00740	48.3
Deide_21580	48
Deide_14230	47.7
Deide_00410	47.6
Deide_00690	47.5
Deide_22760	47.1
Deide_07730	47.1
Deide_14610	46.3
Deide_08810	45.8
Deide_06521	45.8
Deide_08661	45.6
Deide_13980	45.5
Deide_10020	45.4
Deide_21330	45.4
Deide_06980	45.2
Deide_19180	45.1
Deide_01260	44.9
Deide_11070	44.7
Deide_00400	44.5
Deide_12920	44.4
Deide_13420	44.3
Deide_21320	44.1
Deide_18620	43.1
Deide_00630	42.7
Deide_22781	42.4
Deide_02710	42.1
Deide_14030	41.9
Deide_15560	41.4
Deide_15350	40.9
Deide_20253	40.8
Deide_21820	40.7
Deide_17480	39.8
Deide_01140	39.7
Deide_23390	39.1
Deide_23360	38.6
Deide_19960	38.4
Deide_17540	38
Deide_13040	37.8
Deide_20780	37.7
Deide_19140	37
Deide_08461	36.8
Deide_08270	36.6
Deide_17000	36.5
Deide_18470	36.3
Deide_20750	35.8
Deide_01660	35.3
Deide_04860	34.6
Deide_12850	34.2
Deide_22750	33.5
Deide_07590	33.2
Deide_08400	33.1
Deide_16041	33
Deide_12420	32.9
Deide_14410	32.7
Deide_15180	32.6
Deide_05610	32.4
Deide_12261	30.2
Deide_16640	30
Deide_20900	29.9
Deide_21000	29.8
Deide_04160	29.5
Deide_12830	29
Deide_21610	28.9
Deide_03030	28.2
Deide_16300	28.1
Deide_03740	27.7
Deide_17610	27.6
Deide_04170	27.5
Deide_02050	27.4
Deide_03840	27.4
Deide_22490	27.3
Deide_17390	27.2
Deide_12960	26.6
Deide_07040	26.5
Deide_07690	26.2
Deide_19780	26.1
Deide_03920	26
Deide_03560	25.9
Deide_13250	25.8
Deide_03871	25.7
Deide_19580	25.4
Deide_03770	25.3
Deide_06390	24.9
Deide_07570	24.8
Deide_22430	24.7
Deide_19620	24.2
Deide_08310	23.8
Deide_06650	23.5
Deide_06260	23.5
Deide_22820	23.2
Deide_19160	23.1
Deide_08640	22.8
Deide_13480	22.6
Deide_16890	22.6
Deide_02000	22.2
Deide_20510	22.1
Deide_04590	22.1
Deide_01500	21.6
Deide_19540	21.4
Deide_11900	21.2
Deide_16290	21
Deide_15530	21
Deide_10440	20.4
Deide_15280	20.3
Deide_02910	20.2
Deide_11570	19.6
Deide_18280	19
Deide_18290	18.9
Deide_07950	18.8
Deide_11720	18.8
Deide_06710	18.8
Deide_14060	18.7
Deide_10680	18.6
Deide_22500	18.6
Deide_21900	18.6
Deide_13511	18.6
Deide_00910	18.4
Deide_00540	18.4
Deide_08460	18.1
Deide_11300	18
Deide_21630	17.7
Deide_09410	17.7
Deide_01160	17.7
Deide_21620	17.1
Deide_09520	16.9
Deide_05110	16.7
Deide_20760	16.7
Deide_04050	16.6
Deide_14620	16.4
Deide_07532	16.2
Deide_16990	16.1
Deide_01830	16.1
Deide_05040	15.7
Deide_12120	15.6
Deide_08680	15.1
Deide_04280	15.1
Deide_02220	15
Deide_06750	14.9
Deide_11120	14.6
Deide_04450	14.6
Deide_07650	14.6
Deide_14950	14.2
Deide_06581	14
Deide_12060	13.6
Deide_05440	13.3
Deide_19480	13
Deide_11960	12.9
Deide_02610	12.7
Deide_15500	12.4
Deide_07210	12.3
Deide_20090	12.2
Deide_08340	12.1
Deide_22000	11.9
Deide_06490	11.5
Deide_08600	11.4
Deide_03120	11.2
Deide_03610	11.1
Deide_08280	11.1
Deide_14900	11
Deide_14090	10.7
Deide_08370	10.7
Deide_05960	10.3
Deide_02290	10.3
Deide_08730	10.1
Deide_18450	10
Deide_10610	9.77
Deide_21230	9.69
Deide_02750	9.65
Deide_00210	9.55
Deide_06680	9.54
Deide_08970	9.51
Deide_01900	9.34
Deide_05080	9.33
Deide_17490	9.3
Deide_12870	9.24
Deide_03480	9.22
Deide_13020	8.86
Deide_16150	8.77
Deide_22980	8.77
Deide_19610	8.5
Deide_08780	8.12
Deide_05120	7.92
Deide_06610	7.9
Deide_03250	7.84
Deide_20770	7.82
Deide_04091	7.66
Deide_01610	7.46
Deide_11200	7.24
Deide_21370	7.23
Deide_23420	6.76
Deide_09560	6.63
Deide_14580	6.53
Deide_05001	6.49
Deide_13570	6.43
Deide_00450	6.39
Deide_13940	6.16
Deide_00680	5.82
Deide_08980	5.72
Deide_09670	5.67
Deide_22920	5.47
Deide_21110	5.33
Deide_14290	5.15
Deide_17770	5.1
Deide_06520	5.02
Deide_21260	4.89
Deide_08850	4.64
Deide_20260	4.54
Deide_04960	4.52
Deide_06270	4.51
Deide_12200	4.01
Deide_13520	3.87
Deide_09680	3.4
Deide_08490	3.05
Deide_05000	2.88
Deide_08450	2.86
Deide_02310	2.6
Deide_15480	2.2
Deide_08300	2.19
Deide_23430	1.94
Deide_15320	1.57
Deide_21950	0.642

## Sheet: Mpneumoniae
GeneID	abundance			Site	Nuc	N_used	N_expected	Ratio				Site	Nuc	N_used	N_expected	ratio
MPNE_0775	38909			1	G	27	18.821	1.43457				1	C	7	21.379	0.327424
MPNE_0503	37856			2	G	36	37.643	0.956353				2	U	17	42.758	0.397586
MPNE_0675	37075			3	A	61	55.464	1.09981				3	C	31	64.137	0.48334
MPNE_0456	29942			4	G	67	73.286	0.914226				4	C	56	85.516	0.654848
MPNE_0508	26137			5	G	71	78.286	0.906931				5	A	141	95.579	1.47522
MPNE_0707	22588			6	U	80	78.286	1.02189				6	U	177	99.364	1.78133
MPNE_0674	21926			7	G	65	73.286	0.886936				7	U	189	101.267	1.86635
MPNE_0676	21875			8	A	56	55.464	1.00966				8	A	198	102.107	1.93914
MPNE_0295	21484			9	U	45	37.643	1.19544				9	G	132	102.548	1.2872
MPNE_0453	21025			10	C	19	18.821	1.00951				10	A	147	102.631	1.43232
MPNE_0028	20346								GAUCA	1.02469		11	A	142	102.715	1.38247	GAUCA	0.430573
MPNE_0786	17629								CCUCC	1.06238		12	A	132	102.715	1.28511	CCUCC	0.676681
MPNE_0455	16797								Extended			13	G	118	102.631	1.14975	Extended	1.19269
MPNE_0502	16576											14	G	77	102.548	0.750868
MPNE_0366	13655											15	A	67	102.107	0.656174
MPNE_0058	12755											16	G	46	101.267	0.454245
MPNE_0630	12143											17	G	37	99.364	0.372368
MPNE_0452	11905											18	U	37	95.579	0.387114
MPNE_0306	11430											19	G	29	85.516	0.339118
MPNE_0367	11260											20	A	27	64.137	0.420974
MPNE_0165	10309											21	U	23	42.758	0.537911
MPNE_0559	10088											22	C	10	21.379	0.467749
MPNE_0240	9120
MPNE_0282	9103
MPNE_0337	9035
MPNE_0525	8950
MPNE_0451	8797
MPNE_0501	8135
MPNE_0239	8067
MPNE_0220	8050
MPNE_0336	7982
MPNE_0375	7744
MPNE_0551	7354
MPNE_0072	7252
MPNE_0345	7099
MPNE_0256	7048
MPNE_0678	6980
MPNE_0057	6657
MPNE_0744	6539
MPNE_0603	6216
MPNE_0741	5961
MPNE_0736	5689
MPNE_0299	5622
MPNE_0628	5231
MPNE_0076	5146
MPNE_0377	5112
MPNE_0293	5078
MPNE_0093	4993
MPNE_0469	4891
MPNE_0085	4840
MPNE_0730	4738
MPNE_0138	4636
MPNE_0001	4518
MPNE_0381	4501
MPNE_0132	4382
MPNE_0454	4229
MPNE_0637	4195
MPNE_0699	4178
MPNE_0259	4144
MPNE_0444	4093
MPNE_0605	4059
MPNE_0800	4042
MPNE_0226	3957
MPNE_0194	3906
MPNE_0055	3804
MPNE_0531	3804
MPNE_0654	3753
MPNE_0137	3702
MPNE_0164	3668
MPNE_0373	3668
MPNE_0433	3465
MPNE_0447	3431
MPNE_0384	3431
MPNE_0772	3397
MPNE_0653	3397
MPNE_0248	3363
MPNE_0721	3295
MPNE_0196	3244
MPNE_0180	3193
MPNE_0790	3142
MPNE_0782	3057
MPNE_0797	2921
MPNE_0726	2904
MPNE_0554	2887
MPNE_0276	2870
MPNE_0604	2853
MPNE_0261	2836
MPNE_0073	2768
MPNE_0437	2734
MPNE_0668	2649
MPNE_0211	2649
MPNE_0190	2632
MPNE_0439	2615
MPNE_0074	2531
MPNE_0660	2514
MPNE_0032	2514
MPNE_0445	2480
MPNE_0449	2463
MPNE_0071	2412
MPNE_0727	2412
MPNE_0191	2395
MPNE_0519	2395
MPNE_0257	2361
MPNE_0290	2327
MPNE_0278	2293
MPNE_0410	2242
MPNE_0241	2242
MPNE_0500	2208
MPNE_0408	2208
MPNE_0270	2208
MPNE_0263	2174
MPNE_0197	2089
MPNE_0385	2072
MPNE_0183	2055
MPNE_0624	2038
MPNE_0778	2021
MPNE_0272	2004
MPNE_0247	1953
MPNE_0200	1953
MPNE_0275	1936
MPNE_0209	1936
MPNE_0376	1919
MPNE_0279	1885
MPNE_0359	1834
MPNE_0005	1800
MPNE_0157	1766
MPNE_0251	1749
MPNE_0392	1749
MPNE_0287	1732
MPNE_0789	1698
MPNE_0219	1698
MPNE_0458	1698
MPNE_0571	1681
MPNE_0258	1613
MPNE_0520	1596
MPNE_0627	1579
MPNE_0527	1512
MPNE_0731	1444
MPNE_0195	1444
MPNE_0362	1393
MPNE_0288	1376
MPNE_0796	1376
MPNE_0006	1359
MPNE_0077	1359
MPNE_0324	1342
MPNE_0733	1325
MPNE_0374	1308
MPNE_0791	1274
MPNE_0380	1257
MPNE_0024	1257
MPNE_0203	1257
MPNE_0047	1257
MPNE_0271	1240
MPNE_0269	1240
MPNE_0141	1223
MPNE_0723	1206
MPNE_0643	1189
MPNE_0242	1189
MPNE_0480	1189
MPNE_0037	1189
MPNE_0491	1172
MPNE_0341	1172
MPNE_0629	1121
MPNE_0121	1121
MPNE_0260	1104
MPNE_0252	1104
MPNE_0734	1070
MPNE_0701	1070
MPNE_0774	1053
MPNE_0785	1053
MPNE_0086	1053
MPNE_0056	1053
MPNE_0339	1036
MPNE_0344	1036
MPNE_0522	1002
MPNE_0372	1002
MPNE_0343	1002
MPNE_0669	985
MPNE_0575	968
MPNE_0510	968
MPNE_0213	951
MPNE_0494	951
MPNE_0243	934
MPNE_0798	934
MPNE_0780	917
MPNE_0192	917
MPNE_0499	900
MPNE_0441	849
MPNE_0770	849
MPNE_0493	832
MPNE_0289	832
MPNE_0284	832
MPNE_0517	815
MPNE_0566	815
MPNE_0069	798
MPNE_0315	798
MPNE_0300	781
MPNE_0033	764
MPNE_0023	747
MPNE_0027	747
MPNE_0724	730
MPNE_0206	730
MPNE_0015	730
MPNE_0558	713
MPNE_0540	713
MPNE_0662	696
MPNE_0406	696
MPNE_0487	679
MPNE_0641	679
MPNE_0082	645
MPNE_0552	628
MPNE_0025	611
MPNE_0208	611
MPNE_0612	611
MPNE_0560	594
MPNE_0625	577
MPNE_0246	577
MPNE_0265	577
MPNE_0212	560
MPNE_0064	560
MPNE_0022	560
MPNE_0262	526
MPNE_0647	526
MPNE_0443	526
MPNE_0134	526
MPNE_0556	526
MPNE_0712	526
MPNE_0440	493
MPNE_0498	493
MPNE_0651	493
MPNE_0214	493
MPNE_0419	493
MPNE_0136	493
MPNE_0223	476
MPNE_0415	476
MPNE_0696	459
MPNE_0795	459
MPNE_0460	459
MPNE_0703	459
MPNE_0561	442
MPNE_0768	442
MPNE_0216	425
MPNE_0291	425
MPNE_0457	425
MPNE_0222	425
MPNE_0026	408
MPNE_0283	408
MPNE_0442	408
MPNE_0296	408
MPNE_0391	408
MPNE_0201	408
MPNE_0307	408
MPNE_0655	391
MPNE_0207	391
MPNE_0495	391
MPNE_0413	391
MPNE_0122	391
MPNE_0409	374
MPNE_0255	374
MPNE_0294	374
MPNE_0075	357
MPNE_0710	357
MPNE_0091	357
MPNE_0638	357
MPNE_0692	357
MPNE_0215	357
MPNE_0475	357
MPNE_0700	357
MPNE_0799	340
MPNE_0636	340
MPNE_0007	323
MPNE_0621	323
MPNE_0297	306
MPNE_0314	306
MPNE_0792	289
MPNE_0411	289
MPNE_0332	289
MPNE_0729	289
MPNE_0709	289
MPNE_0301	289
MPNE_0218	289
MPNE_0661	289
MPNE_0420	289
MPNE_0313	289
MPNE_0735	289
MPNE_0567	272
MPNE_0646	272
MPNE_0656	272
MPNE_0555	272
MPNE_0582	272
MPNE_0264	255
MPNE_0572	255
MPNE_0773	255
MPNE_0080	255
MPNE_0342	255
MPNE_0505	255
MPNE_0092	255
MPNE_0378	255
MPNE_0292	238
MPNE_0039	238
MPNE_0224	238
MPNE_0142	238
MPNE_0615	238
MPNE_0693	238
MPNE_0471	238
MPNE_0286	221
MPNE_0021	221
MPNE_0018	221
MPNE_0036	221
MPNE_0563	221
MPNE_0210	204
MPNE_0761	204
MPNE_0068	204
MPNE_0771	204
MPNE_0188	204
MPNE_0187	204
MPNE_0725	204
MPNE_0049	187
MPNE_0067	187
MPNE_0708	187
MPNE_0553	187
MPNE_0135	170
MPNE_0199	170
MPNE_0079	170
MPNE_0663	170
MPNE_0518	153
MPNE_0650	153
MPNE_0569	153
MPNE_0418	153
MPNE_0594	153
MPNE_0204	153
MPNE_0268	153
MPNE_0477	153
MPNE_0496	153
MPNE_0779	153
MPNE_0591	153
MPNE_0140	153
MPNE_0613	136
MPNE_0198	136
MPNE_0245	136
MPNE_0412	136
MPNE_0253	136
MPNE_0722	136
MPNE_0368	136
MPNE_0539	136
MPNE_0550	136
MPNE_0649	119
MPNE_0737	119
MPNE_0280	119
MPNE_0573	119
MPNE_0390	119
MPNE_0383	119
MPNE_0461	119
MPNE_0309	119
MPNE_0310	119
MPNE_0609	102
MPNE_0379	102
MPNE_0002	102
MPNE_0421	102
MPNE_0728	102
MPNE_0363	102
MPNE_0277	102
MPNE_0459	102
MPNE_0396	102
MPNE_0357	84.9
MPNE_0667	84.9
MPNE_0697	84.9
MPNE_0144	84.9
MPNE_0101	84.9
MPNE_0777	67.9
MPNE_0382	67.9
MPNE_0273	67.9
MPNE_0089	67.9
MPNE_0184	67.9
MPNE_0642	67.9
MPNE_0088	51
MPNE_0225	51
MPNE_0050	51
MPNE_0393	51
MPNE_0010	51
MPNE_0698	51
MPNE_0008	51
MPNE_0652	34

## Sheet: Senterica
Locus_Tag	Protein abundance			Site	Nuc	N_used	N_expected	Ratio
STM4170	26618			1	A	889	294.899	3.01459
STM0451	19592			2	G	1290	589.798	2.18719
STM1377	19210			3	G	1657	884.196	1.87402
STM3445	18696			4	A	1823	1177.93	1.54763
STM4146	18696			5	G	1445	1299.79	1.11172
STM4561	17781			6	G	928	1320.79	0.702612
STM4330	17139			7	U	659	1299.79	0.507007
STM1070	16392			8	G	464	1177.93	0.393912
STM4152	16364			9	A	369	884.196	0.417328
STM2795	14321			10	U	221	589.798	0.374705
STM1705	13831			11	C	69	294.899	0.233978	GAUCA	0.385386
STM4240	12047								CCUCC	1.48463
STM0831	11432								Extended	3.01459
STM1513	11045
STM1751	10884
STM1729	10269
STM1290	9531
STM1121	8090
STM0465	7354
STM1959	7302
STM0043	6881
STM3447	6881
STM4393	6524
STM2771	6412
STM1728	6372
STM4329	6313
STM3428	6167
STM3432	6017
STM0982	5653
STM2952	5317
STM3433	5236
STM0417	5156
STM3414	5087
STM3865	5042
STM3424	5029
STM1730	4949
STM3418	4814
STM2224	4745
STM1376	4741
STM3416	4677
STM4151	4658
STM3359	4623
STM3435	4622
STM0225	4524
STM2433	4424
STM3440	4304
STM3434	4241
STM4394	4214
STM2673	4173
STM0217	4144
STM2983	4107
STM3421	4063
STM3441	4022
STM1731	3971
STM2311	3927
STM3446	3921
STM2431	3901
STM3423	3875
STM0772	3859
STM3229	3842
STM1837	3789
STM1238	3768
STM0366	3765
STM1565	3749
STM2267	3685
STM1732	3679
STM4439	3676
STM1246	3593
STM3069	3391
STM3867	3364
STM4150	3272
STM4391	3235
STM3591	3217
STM3063	3124
STM3552	3088
STM1445	3053
STM0629	2933
STM2676	2932
STM3425	2922
STM1440	2920
STM3728	2812
STM0383	2791
STM3429	2783
STM0981	2782
STM2799	2774
STM0833	2725
STM1119	2713
STM4414	2704
STM3344	2695
STM3437	2613
STM1044	2611
STM0402	2602
STM3228	2481
STM0216	2471
STM2646	2471
STM0749	2446
STM3884	2416
STM0154	2399
STM3426	2389
STM4458	2389
STM3680	2275
STM0219	2263
STM3068	2221
STM3054	2215
STM3869	2194
STM0738	2180
STM3436	2148
STM1451	2145
STM2141	2143
STM0614	2122
STM0133	2103
STM1339	2099
STM1191	2080
STM3186	2077
STM0447	2060
STM3422	2042
STM3209	2031
STM0209	2011
STM2873	2003
STM1308	1998
STM4149	1992
STM4319	1968
STM1172	1948
STM3303	1938
STM2190	1938
STM1682	1926
STM2555	1891
STM0608	1885
STM0007	1849
STM1567	1797
STM0152	1761
STM1652	1746
STM3727	1742
STM1311	1737
STM3157	1736
STM0012	1734
STM1954	1697
STM0737	1675
STM2430	1668
STM0488	1667
STM3701	1597
STM0536	1556
STM1700	1554
STM4519	1525
STM0973	1513
STM0227	1510
STM1830	1509
STM2395	1492
STM3345	1484
STM1165	1479
STM2526	1465
STM4326	1450
STM3439	1448
STM1195	1441
STM1231	1426
STM0476	1410
STM1772	1406
STM1251	1402
STM3415	1381
STM4077	1375
STM3500	1306
STM3040	1303
STM0830	1295
STM4336	1272
STM1378	1227
STM4153	1211
STM3453	1195
STM0384	1191
STM4364	1171
STM2090	1166
STM3065	1155
STM1815	1112
STM4154	1111
STM1572	1107
STM3557	1105
STM2165	1087
STM3917	1049
STM2488	1043
STM3857	1027
STM3430	1020
STM3850	1017
STM3076	1014
STM4086	1011
STM0435	1007
STM3866	993
STM2826	980
STM0998	977
STM1406	975
STM2491	974
STM2498	954
STM0647	944
STM4055	943
STM3165	938
STM1214	937
STM4148	936
STM3385	931
STM1485	931
STM3526	928
STM2660	919
STM2473	916
STM2610	912
STM1205	910
STM1919	906
STM3106	873
STM1408	868
STM3180	865
STM2786	863
STM0665	862
STM4081	861
STM3417	853
STM1749	847
STM1690	839
STM3839	837
STM2861	828
STM2432	826
STM0386	817
STM0890	813
STM4078	809
STM3443	807
STM0698	797
STM3455	790
STM4331	783
STM1796	777
STM4363	767
STM2474	763
STM2817	761
STM0977	753
STM2354	752
STM4570	751
STM0734	745
STM3347	742
STM2378	738
STM0730	738
STM3176	738
STM3283	737
STM0406	729
STM3282	726
STM3684	724
STM4366	714
STM0316	712
STM4342	706
STM1286	705
STM3915	703
STM2444	702
STM2445	702
STM2338	699
STM4581	693
STM2081	689
STM2585A	688
STM1867	688
STM3595	686
STM1000	684
STM1511	683
STM2282	681
STM1633	674
STM3868	670
STM0735	669
STM3438	663
STM3502	657
STM3864	656
STM0739	655
STM1078	653
STM4088	647
STM3763	647
STM3741	645
STM4343	645
STM1196	644
STM0617	644
STM3304	641
STM1336	638
STM3348	638
STM2098	632
STM3466	631
STM0158	630
STM1810	623
STM3481	622
STM1661	620
STM3431	611
STM2472	604
STM4256	601
STM0684	598
STM1310	596
STM1780	589
STM0892	582
STM3655	577
STM4512	570
STM2337	569
STM0153	569
STM1478	566
STM3380	565
STM2511	553
STM1712	552
STM1752	550
STM4533	550
STM3053	547
STM3374	545
STM0232	540
STM1647	539
STM0485	537
STM1515	537
STM0958	531
STM3216	531
STM1349	522
STM3269	522
STM0445	520
STM1698	518
STM1444	518
STM3286	517
STM3296	517
STM4183	516
STM1884	512
STM2139	512
STM3078	511
STM4598	510
STM0950	507
STM1469	505
STM4569	502
STM2791	499
STM4062	496
STM0740	495
STM4229	494
STM1466	491
STM0736	488
STM1795	488
STM2884	487
STM0837	483
STM0307	482
STM4221	475
STM1177	475
STM3997	474
STM1249	474
STM1589	474
STM1318	473
STM0413	467
STM4184	463
STM1090	461
STM0452	459
STM2369	456
STM3968	453
STM3580	453
STM2802	451
STM1153	448
STM3936	446
STM4232	446
STM0887	445
STM3995	438
STM0310	438
STM1117	432
STM0186	430
STM3048	429
STM3539	425
STM2045	423
STM2465	422
STM1328	419
STM1563	419
STM4091	417
STM4415	417
STM0443	415
STM0191	413
STM3630	409
STM1901	408
STM1341	408
STM1197	403
STM1935	403
STM0004	402
STM1727	397
STM4009	395
STM3090	390
STM1479	390
STM0213	389
STM3710	389
STM2663	386
STM0449	381
STM2071	381
STM1433	377
STM4275	377
STM4064	374
STM3342	370
STM0953	363
STM2038	363
STM2780	362
STM1915	361
STM0963	359
STM1770	357
STM3686	355
STM3709	355
STM1888	345
STM1326	341
STM4567	338
STM3055	337
STM2391	334
STM2270	332
STM0171	332
STM0693	330
STM0501	330
STM0862	326
STM0242	322
STM3708	321
STM2042	321
STM0616	321
STM1819	320
STM2324	318
STM3567	318
STM1296	318
STM1599	316
STM1597	312
STM3535	312
STM1303	310
STM4007	309
STM1842	309
STM1426	308
STM1778	307
STM0999	306
STM2510	305
STM1396	304
STM0092	303
STM3062	303
STM3339	302
STM1686	302
STM1333	296
STM2789	296
STM2079	296
STM3448	295
STM1285	295
STM2862	294
STM1921	292
STM1480	292
STM2524	291
STM2533	290
STM2523	289
STM3307	289
STM3267	289
STM1203	288
STM2489	286
STM3594	282
STM0450	281
STM2385	281
STM2953	278
STM0245	275
STM2351	275
STM3702	270
STM4477	269
STM2544	267
STM0224	267
STM1431	267
STM4063	266
STM0067	265
STM3935	264
STM0202	264
STM2392	264
STM1067	261
STM3287	261
STM2895	261
STM3645	260
STM3319	259
STM4245	259
STM3973	258
STM0080	258
STM3379	257
STM0863	256
STM2681	254
STM3217	253
STM1232	252
STM1222	252
STM2366	252
STM3577	250
STM2325	249
STM3703	245
STM2403	244
STM3842	243
STM3909	241
STM3919	241
STM0093	240
STM1194	240
STM2792	240
STM1607	239
STM2665	237
STM1439	237
STM3570	237
STM0448	235
STM2171	235
STM2487	234
STM0534	231
STM3468	230
STM1185	229
STM2298	229
STM3885	228
STM2829	226
STM3341	222
STM0475	222
STM4092	219
STM1832	217
STM4109	217
STM2070	217
STM0218	216
STM1928	214
STM3984	210
STM1135	210
STM3299	209
STM1467	208
STM2080	208
STM0786	208
STM2278	204
STM3293	202
STM3483	202
STM2299	202
STM1566	200
STM3058	199
STM1057	198
STM4568	197
STM2370	197
STM2827	195
STM0781	195
STM3485	194
STM1763	193
STM1803	193
STM4259	192
STM4119	192
STM2041	192
STM4438	192
STM3694	192
STM1797	192
STM1401	191
STM1784	190
STM0748	190
STM3248	188
STM1289	187
STM1764	185
STM3095	185
STM3597	183
STM2495	183
STM0686	182
STM0872	181
STM0498	181
STM0996	181
STM0483	180
STM3272	180
STM1397	179
STM4120	179
STM3618	179
STM1540	178
STM3200	177
STM2326	176
STM0961	176
STM1816	176
STM2307	175
STM0407	175
STM3152	175
STM1375	175
STM4249	174
STM1091	174
STM1171	173
STM0760	173
STM4475	172
STM2677	172
STM4348	171
STM1851	171
STM3472	170
STM4163	170
STM3321	170
STM1338	169
STM2091	169
STM4122	169
STM1269	167
STM0136	165
STM2969	165
STM2415	164
STM2074	164
STM3656	163
STM0424	163
STM3138	163
STM0648	162
STM1337	162
STM3903	161
STM0542	161
STM0169	161
STM2384	160
STM3322	159
STM2582	159
STM2314	159
STM0372	158
STM2148	158
STM2072	158
STM0959	157
STM4408	157
STM1118	156
STM3060	156
STM1463	156
STM3835	155
STM0803	155
STM0615	155
STM0776	154
STM2798	154
STM2521	152
STM1193	152
STM0637	151
STM4175	151
STM4404	151
STM0792	151
STM3853	150
STM2559	150
STM0046	150
STM0972	150
STM1123	150
STM2543	149
STM4469	149
STM0064	149
STM1927	148
STM1726	148
STM1558	148
STM3327	146
STM4334	145
STM0687	145
STM1435	144
STM0408	144
STM4368	142
STM1400	142
STM0697	141
STM0712	141
STM0228	140
STM1916	140
STM1163	140
STM0935	139
STM2482	139
STM0464	139
STM0397	139
STM4470	137
STM2643	137
STM1468	136
STM3294	136
STM1560	136
STM2266	136
STM1899	135
STM0066	135
STM2294	135
STM1626	135
STM1846	134
STM1398	134
STM2140	133
STM3610	133
STM4106	132
STM1964	132
STM4089	132
STM2871	132
STM1207	132
STM1449	131
STM2277	130
STM2155	129
STM2272	129
STM1847	128
STM1244	127
STM2522	126
STM4130	126
STM1717	126
STM1953	126
STM2040	125
STM3288	125
STM2929	125
STM2327	124
STM4164	124
STM3147	123
STM2520	123
STM0129	123
STM2898	123
STM4351	123
STM2885	123
STM0980	122
STM1920	122
STM3601	121
STM3392	121
STM3203	120
STM0168	120
STM0941	119
STM3689	118
STM2287	118
STM3487	117
STM1450	116
STM3486	116
STM3107	115
STM3043	115
STM1399	115
STM2183	115
STM1709	115
STM0578	114
STM0419	114
STM3233	113
STM3970	113
STM0123	113
STM4059	112
STM0711	112
STM2475	111
STM0638	110
STM0570	110
STM1909	109
STM0797	109
STM3861	108
STM4403	108
STM1058	108
STM3305	107
STM1917	106
STM4096	105
STM3685	105
STM4530	105
STM1627	105
STM2565	105
STM2340	105
STM1707	105
STM0685	104
STM3086	104
STM4460	104
STM1305	104
STM3111	103
STM4467	103
STM0108	103
STM0418	102
STM1509	102
STM3564	102
STM3999	101
STM2341	101
STM0013	100
STM0112	100
STM3967	100
STM3285	99.4
STM3301	99.3
STM0359	99.3
STM2297	99
STM2925	98.7
STM4542	98.6
STM0779	98.5
STM4465	98.3
STM0392	98.1
STM2075	97.9
STM0964	97.6
STM0360	97.3
STM4160	97.2
STM3649	97
STM0747	96.9
STM2546	96.6
STM2328	96.5
STM1562	96
STM2934	95.6
STM1844	95.1
STM1886	94.6
STM2670	94.1
STM4291	93.9
STM4126	93.6
STM0368	93.6
STM2077	92.7
STM0669	92.3
STM3368	92.1
STM1297	91.6
STM1767	91.6
STM2076	91.4
STM4028	91.3
STM3337	90.9
STM0628	90.5
STM2147	90.4
STM3498	90.1
STM2078	90.1
STM4466	89.8
STM4349	88.8
STM1112	88.7
STM0495	88.7
STM3007	88.6
STM3311	88.5
STM1587	88.5
STM3109	88.3
STM1448	88
STM1500	88
STM2276	87.9
STM2405	87.9
STM1756	87.4
STM1977	86.9
STM1322	86.8
STM3952	86.6
STM4231	86.5
STM0321	86.3
STM1497	85.8
STM0965	85.8
STM1711	85.7
STM3904	85.6
STM3700	85.5
STM0170	84.9
STM0421	84.6
STM3704	84.3
STM1320	84.3
STM1724	84.2
STM4176	83.8
STM3249	83.5
STM2886	83.3
STM3511	82.7
STM1631	81.9
STM3195	81.7
STM0128	81.5
STM3159	81.2
STM0828	81.1
STM1640	81.1
STM1826	81
STM0190	80.8
STM0970	80.4
STM0774	80.2
STM0327	80.2
STM3536	79.7
STM0783	79.5
STM2486	78.9
STM1934	78.7
STM4242	78.3
STM4356	78.3
STM1738	77.7
STM2428	77
STM2536	77
STM0585	76.8
STM0694	76.4
STM0207	76.2
STM0846	76.1
STM3164	75.7
STM3957	75.7
STM1369	75.4
STM0984	75.1
STM1702	74.4
STM2350	74.1
STM3047	73.9
STM4586	73.9
STM0141	73.7
STM0132	73.7
STM0317	73.5
STM2561	73.5
STM1064	73.5
STM2362	73.4
STM2167	73.2
STM1218	73.1
STM0118	73.1
STM3925	72.7
STM1559	72.7
STM0741	72.5
STM1314	72.5
STM2831	72.4
STM1723	72.3
STM3646	72
STM0633	71.1
STM4084	70.6
STM4165	70.3
STM1229	69.8
STM2947	69.8
STM2874	69.7
STM2146	69.2
STM3647	69
STM3077	68.9
STM0537	68.7
STM1824	68.7
STM1150	68.5
STM3310	68.4
STM0733	68.1
STM2872	68
STM1716	67.9
STM3140	67.8
STM2321	67.7
STM0533	67.5
STM2051	67.5
STM0494	67.5
STM3624	67.3
STM1418	67.3
STM2194	67
STM1394	66.7
STM0745	66.1
STM3331	65.7
STM1300	65.7
STM2935	65.4
STM3551	65.4
STM0773	65.3
STM0680	64.9
STM0849	64.8
STM0393	64.8
STM0130	64.7
STM1473	64.6
STM1295	64.4
STM3722	64.1
STM2347	64.1
STM2639	63.8
STM2882	63.8
STM2578	63.4
STM3452	63.1
STM3862	62.8
STM3538	62.7
STM0415	62.6
STM0215	62.5
STM3731	62.2
STM2988	62.2
STM1598	62.2
STM2094	62.1
STM2662	61.9
STM2259	61.8
STM2095	61.7
STM1407	61.7
STM3313	61.6
STM2855	61.3
STM3569	61.3
STM2818	60.9
STM2960	60.7
STM1951	60.6
STM3407	60.4
STM0823	60.3
STM3363	60.3
STM3740	60
STM2029	60
STM1592	59.9
STM4456	59.8
STM4397	59.2
STM4237	59.2
STM3761	58.4
STM2206	58.4
STM2390	58.3
STM3008	58.3
STM0945	58.1
STM1076	57.5
STM4235	57.4
STM1742	57.4
STM4125	57.2
STM3149	57.1
STM3067	57
STM1412	56.8
STM1679	56.8
STM0931	56.7
STM4100	56.5
STM1891	56.4
STM3464	56.3
STM0994	56.2
STM1373	55.9
STM3108	55.5
STM1236	55.3
STM0008	55.1
STM1436	55
STM1715	54.7
STM0993	54.6
STM1136	54.6
STM0701	54.4
STM1304	54.4
STM0469	54.2
STM3103	54.2
STM4486	53.7
STM2683	53.5
STM2092	53.1
STM3946	53.1
STM3571	52.9
STM3914	52.9
STM3335	52.6
STM3450	52.6
STM1689	52.5
STM1151	52.1
STM4541	52
STM1371	51.9
STM3401	51.4
STM1233	51
STM4362	50.5
STM1923	50.5
STM2365	50.4
STM3523	50.3
STM0165	50.2
STM1409	50.2
STM1227	49.8
STM4503	49.7
STM3626	49.7
STM2667	49.6
STM4258	49.6
STM0244	49.4
STM3748	49.3
STM0956	49.2
STM1635	49.2
STM3001	49.1
STM0442	49.1
STM1825	48.8
STM4190	48.5
STM4029	48.5
STM3877	48.4
STM0002	48
STM4108	47.9
STM3613	47.9
STM1743	47.7
STM4026	47.6
STM0653	47.5
STM2538	47.4
STM2583	47.4
STM2073	47.4
STM2876	47.3
STM3820	47.3
STM1530	47.1
STM4220	46.9
STM0489	46.8
STM3315	46.7
STM0429	46.6
STM3974	46.6
STM2869	45.9
STM0120	45.7
STM1212	45.7
STM1306	45.4
STM4379	45.3
STM0934	45.3
STM3402	45.3
STM2519	45.2
STM3831	45.2
STM0750	45.1
STM2878	45.1
STM3094	45
STM1970	44.8
STM2097	44.8
STM2813	44.6
STM3406	44.1
STM1514	44
STM2121	43.7
STM1995	43.6
STM0166	43.5
STM3965	43.4
STM2334	43.4
STM4230	43.3
STM3978	43.3
STM3616	43.3
STM1137	43.1
STM1184	43.1
STM3854	42.9
STM1849	42.9
STM2406	42.9
STM1638	42.9
STM1962	42.8
STM1160	42.8
STM2458	42.5
STM3921	42.5
STM2204	42.4
STM2152	42.2
STM0681	42.2
STM4246	42.1
STM0051	42.1
STM3730	42
STM0246	41.6
STM2931	41.6
STM3506	41.5
STM4587	41.3
STM2285	41.2
STM4001	41.1
STM2581	41.1
STM0822	41
STM2809	41
STM3723	40.9
STM0247	40.5
STM1960	40.5
STM3725	40.4
STM3330	40.3
STM3317	40.2
STM4085	40.1
STM2389	39.9
STM2652	39.6
STM4123	39.2
STM1583	39
STM3584	38.9
STM2446	38.9
STM2814	38.9
STM1940	38.9
STM2992	38.8
STM3328	38.5
STM2226	38.5
STM3169	38.3
STM2348	38.3
STM1577	38.2
STM0791	38.2
STM0318	38.1
STM3093	38
STM4037	37.9
STM4167	37.8
STM0874	37.8
STM1961	37.7
STM3504	37.7
STM2447	37.6
STM2300	37.6
STM2456	37.6
STM0255	37.4
STM1221	37.3
STM1578	37.1
STM3376	37
STM2967	37
STM1986	36.8
STM4194	36.7
STM3011	36.6
STM3596	36.4
STM0662	36.4
STM0370	36.4
STM2808	36.2
STM2154	36.2
STM0928	36.1
STM2883	35.9
STM2166	35.8
STM0416	35.7
STM3158	35.6
STM3349	35.2
STM4300	35.1
STM2184	35.1
STM0096	34.9
STM0380	34.9
STM4003	34.3
STM0670	34.3
STM4233	34.3
STM3733	34.2
STM2542	34.1
STM2933	34.1
STM2262	33.9
STM0600	33.9
STM1968	33.7
STM0306	33.6
STM2120	33.5
STM2346	33.4
STM0877	33.4
STM4410	33.4
STM3135	33.3
STM1299	33.2
STM3241	33.2
STM3802	33.1
STM2039	33
STM1704	33
STM3762	33
STM2189	32.8
STM0609	32.6
STM2163	32.6
STM1330	32.4
STM3998	32.2
STM0683	32.2
STM4496	31.9
STM2064	31.8
STM1812	31.5
STM1625	31.5
STM0631	31
STM1179	30.8
STM3875	30.7
STM1302	30.6
STM1955	30.5
STM3137	30.5
STM2355	30.5
STM0516	30.4
STM3837	30.3
STM0431	30.3
STM3041c	29.9
STM0248	29.9
STM2009	29.8
STM3983	29.7
STM1012	29.6
STM2628	29.6
STM3038	29.6
STM0237	29.4
STM2945	29.4
STM2918	29.3
STM3179	29.2
STM1277	29.2
STM4034	29.1
STM4480	29
STM3308	28.7
STM3576	28.7
STM2648	28.6
STM0813	28.6
STM2331	28.5
STM2891	28.5
STM4525	28.2
STM2065	28.2
STM0504	28.1
STM1275	28
STM1895	28
STM4004	27.9
STM4118	27.9
STM4417	27.8
STM3534	27.8
STM1211	27.7
STM0943	27.7
STM2050	27.6
STM3150	27.5
STM1602	27.5
STM4267	27.4
STM2777	27.4
STM0920	27.2
STM3561	27.1
STM0235	27
STM2781	26.9
STM4322	26.9
STM2241	26.9
STM2970	26.7
STM2027	26.7
STM1051	26.7
STM1226	26.6
STM4381	26.5
STM1155	26.5
STM1475	26.5
STM1442	26.3
STM0164	26.3
STM2971	26.2
STM3361	26.1
STM1737	26.1
STM0661	26.1
STM2441	25.9
STM0126	25.7
STM1800	25.5
STM4405	25.4
STM2343	25.2
STM1714	25
STM3667	25
STM3929	25
STM1131	24.9
STM3962	24.8
STM2963	24.6
STM3070	24.6
STM1876	24.6
STM0602	24.5
STM1147	24.5
STM3410	24.4
STM1381	24.3
STM2835	24.3
STM0369	24.3
STM1912	24.3
STM4358	24.3
STM4292	24.3
STM0940	24.2
STM3560	24.2
STM2193	24.2
STM1725	24.1
STM1883	24
STM1855	23.9
STM3598	23.9
STM2948	23.8
STM0180	23.8
STM4577	23.8
STM1905	23.7
STM1820	23.7
STM2685	23.6
STM2409	23.4
STM0181	23.4
STM1971	23.4
STM1324	23.3
STM0891	23.3
STM0506	23.2
STM2153	23.1
STM4357	23.1
STM3682	23.1
STM3268	23.1
STM1969	23
STM3360	22.9
STM2130	22.9
STM0588	22.9
STM0117	22.9
STM3589	22.8
STM3136	22.8
STM3505	22.8
STM0622	22.7
STM1294	22.7
STM2024	22.7
STM3408	22.6
STM1949	22.5
STM3871	22.4
STM1230	22.4
STM0432	22.4
STM2219	22.3
STM4072	22.2
STM2985	22.1
STM0163	22.1
STM1822	22.1
STM0667	22
STM1392	21.9
STM3982	21.9
STM1976	21.8
STM3697	21.8
STM3622	21.6
STM3493	21.5
STM0223	21.5
STM0704	21.5
STM4099	21.4
STM2525	21.4
STM4426	21.4
STM3612	21.4
STM3316	21.2
STM4494	21.1
STM1688	21
STM3938	21
STM2364	21
STM2545	20.9
STM4058	20.9
STM4341	20.9
STM1206	20.9
STM2951	20.8
STM1183	20.7
STM4560	20.5
STM1323	20.5
STM3223	20.5
STM3565	20.4
STM3734	20.3
STM2296	20.3
STM0838	20.2
STM2956	20.2
STM3318	20.1
STM4416	20
STM4159	20
STM3681	20
STM2443	20
STM1430	19.9
STM1391	19.8
STM1062	19.7
STM0309	19.5
STM3174	19.5
STM4479	19.5
STM1975	19.5
STM3979	19.5
STM0793	19.5
STM2900	19.4
STM0815	19.4
STM3155	19.3
STM1624	19.2
STM1365	19.2
STM2638	19.1
STM2232	19.1
STM2015	19.1
STM3587	18.9
STM3517	18.8
STM4286	18.8
STM0607	18.7
STM2896	18.7
STM1260	18.6
STM0974	18.5
STM1814	18.5
STM1651	18.5
STM4101	18.4
STM4254	18.4
STM1956	18.2
STM3281	18.2
STM3409	18.2
STM0785	18.2
STM2033	18.2
STM3699	18.1
STM3002	18
STM4036	17.9
STM3167	17.9
STM1538	17.9
STM3838	17.9
STM1066	17.8
STM1367	17.7
STM1681	17.7
STM0979	17.6
STM1880	17.5
STM1291	17.5
STM2414	17.5
STM0405	17.4
STM1282	17.4
STM3036	17.4
STM0997	17.2
STM0510	17.2
STM2096	17.1
STM0150	17.1
STM4582	17.1
STM2284	17.1
STM2122	17
STM1261	17
STM3297	17
STM3711	17
STM3783	16.9
STM3910	16.8
STM0390	16.8
STM2388	16.8
STM0308	16.8
STM1411	16.7
STM4344	16.7
STM3874	16.6
STM1831	16.5
STM2061	16.5
STM1069	16.5
STM1493	16.5
STM4585	16.5
STM1372	16.4
STM3240	16.4
STM0151	16.3
STM0122	16.3
STM2675	16.2
STM4497	16.2
STM0111	16.2
STM2083	16.2
STM1972	16.2
STM0988	16.1
STM1776	16
STM2136	15.9
STM2131	15.9
STM1209	15.9
STM2782	15.8
STM4044	15.7
STM0322	15.7
STM3023	15.7
STM4409	15.7
STM4398	15.7
STM3614	15.7
STM1929	15.7
STM3497	15.6
STM3309	15.5
STM2312	15.3
STM0423	15.2
STM2909	15.1
STM1691	15.1
STM2837	15.1
STM1133	14.9
STM4168	14.9
STM4532	14.8
STM2892	14.8
STM3712	14.8
STM4325	14.7
STM3987	14.7
STM2661	14.6
STM0140	14.6
STM2001	14.5
STM2222	14.5
STM2199	14.4
STM3139	14.4
STM0597	14.4
STM0957	14.4
STM0139	14.3
STM1216	14.3
STM0048	14.3
STM0888	14.2
STM2463	14.2
STM1187	14.1
STM3161	14.1
STM0705	14.1
STM1489	14
STM3905	14
STM3399	13.9
STM3879	13.9
STM3495	13.9
STM4535	13.7
STM0484	13.6
STM3461	13.5
STM1750	13.5
STM3972	13.4
STM0087	13.4
STM2413	13.4
STM1094	13.4
STM2535	13.3
STM2890	13.3
STM2924	13.2
STM1845	13.2
STM2093	13.2
STM3172	13.1
STM4339	13.1
STM0184	13
STM2228	13
STM2669	12.9
STM0116	12.9
STM1180	12.9
STM4369	12.8
STM2539	12.8
STM0192	12.8
STM0260	12.7
STM3377	12.7
STM0486	12.7
STM1176	12.7
STM0505	12.7
STM4187	12.6
STM1595	12.6
STM0091	12.6
STM4499	12.5
STM1958	12.5
STM1713	12.5
STM2811	12.4
STM1502	12.4
STM4453	12.4
STM1415	12.4
STM1512	12.4
STM4539	12.3
STM2025	12.2
STM1648	12.2
STM3112	12.2
STM1068	12.1
STM2483	12.1
STM3212	12.1
STM1127	12.1
STM1561	12
STM3456	12
STM0594	11.9
STM2580	11.8
STM1292	11.8
STM4407	11.6
STM4490	11.6
STM0598	11.6
STM1879	11.5
STM4500	11.5
STM0788	11.4
STM2946	11.3
STM2917	11.3
STM1542	11.2
STM4093	11.2
STM4192	11.1
STM3181	11.1
STM3340	11.1
STM4350	11.1
STM4359	11.1
STM0446	11.1
STM1173	11.1
STM3263	11
STM1344	11
STM1918	11
STM1676	10.9
STM2865	10.9
STM1608	10.9
STM0985	10.9
STM0162	10.9
STM2894	10.8
STM0045	10.8
STM4139	10.7
STM3243	10.7
STM2332	10.7
STM2016	10.7
STM3132	10.6
STM3202	10.6
STM0586	10.6
STM2532	10.5
STM1224	10.5
STM4288	10.5
STM3620	10.5
STM0852	10.4
STM0434	10.4
STM3336	10.4
STM3071	10.4
STM3721	10.3
STM4579	10.3
STM0124	10.3
STM3188	10.2
STM1414	10.2
STM0671	10.2
STM0473	10.1
STM1641	10.1
STM2501	10.1
STM2914	10
STM2178	9.99
STM1242	9.99
STM2186	9.99
STM0746	9.97
STM4377	9.83
STM1719	9.82
STM4498	9.82
STM3477	9.8
STM1594	9.76
STM0962	9.74
STM2930	9.73
STM1004	9.71
STM0320	9.71
STM2342	9.7
STM1779	9.69
STM2383	9.68
STM3118	9.67
STM2368	9.66
STM1263	9.62
STM1887	9.56
STM3513	9.56
STM3235	9.56
STM4583	9.46
STM1805	9.44
STM3185	9.44
STM2246	9.44
STM3482	9.43
STM1200	9.43
STM4360	9.41
STM2427	9.34
STM0775	9.32
STM4459	9.31
STM4251	9.29
STM1683	9.29
STM1984	9.28
STM1593	9.24
STM0806	9.23
STM1539	9.21
STM2203	9.2
STM0978	9.18
STM1080	9.13
STM1102	9.12
STM1922	9.09
STM0229	9.08
STM3295	9.08
STM2457	9.06
STM0642	9.02
STM1554	9.02
STM0003	9.02
STM3514	9.01
STM3920	8.94
STM4549	8.93
STM3156	8.87
STM4181	8.84
STM3950	8.82
STM0812	8.78
STM2330	8.78
STM4073	8.76
STM2084	8.75
STM0376	8.72
STM3214	8.67
STM0094	8.65
STM0425	8.56
STM3943	8.55
STM3554	8.55
STM3300	8.54
STM1622	8.52
STM2748	8.46
STM1938	8.46
STM0113	8.45
STM0688	8.43
STM4248	8.38
STM1402	8.35
STM3600	8.34
STM2256	8.33
STM0800	8.33
STM1434	8.3
STM3496	8.3
STM0682	8.28
STM3796	8.28
STM3923	8.24
STM3843	8.2
STM4193	8.19
STM1178	8.17
STM1125	8.15
STM2647	8.13
STM3334	8.12
STM2926	8.09
STM1570	8.04
STM0261	8.04
STM3810	8.04
STM3230	7.98
STM3545	7.93
STM3615	7.92
STM0641	7.88
STM2253	7.88
STM3818	7.88
STM0182	7.84
STM4131	7.71
STM0599	7.67
STM3840	7.62
STM2928	7.57
STM4529	7.52
STM4080	7.5
STM2820	7.46
STM0569	7.41
STM1508	7.41
STM2066	7.4
STM3390	7.35
STM1718	7.29
STM4510	7.29
STM2968	7.27
STM0357	7.26
STM3830	7.23
STM0433	7.19
STM3902	7.19
STM3242	7.18
STM4074	7.15
STM3465	7.13
STM4578	7.08
STM0842	7.07
STM2468	7.04
STM1061	7.03
STM4516	7.02
STM3525	7
STM0778	7
STM0364	7
STM3470	6.99
STM4536	6.96
STM0878	6.95
STM2201	6.93
STM3652	6.92
STM3462	6.92
STM1073	6.89
STM4262	6.88
STM2082	6.8
STM3922	6.77
STM0377	6.73
STM0975	6.71
STM4067	6.71
STM2991	6.7
STM2187	6.67
STM0499	6.64
STM2213	6.64
STM3154	6.63
STM2746	6.61
STM1181	6.6
STM4105	6.58
STM3755	6.53
STM2286	6.5
STM3251	6.48
STM4243	6.46
STM0353	6.4
STM3642	6.39
STM0422	6.3
STM1358	6.29
STM2916	6.29
STM2283	6.28
STM3543	6.28
STM0404	6.25
STM3459	6.23
STM2954	6.22
STM3882	6.22
STM1348	6.18
STM0172	6.16
STM1312	6.14
STM3757	6.14
STM0804	6.14
STM2651	6.1
STM2564	6.08
STM1658	6.08
STM3714	6.06
STM4283	6.06
STM4025	6.06
STM4491	6.05
STM1549	6.04
STM3533	6.04
STM3244	6.02
STM3208	6.01
STM1129	6
STM1169	6
STM2089	5.99
STM4293	5.95
STM2249	5.94
STM3814	5.94
STM1202	5.93
STM2562	5.93
STM1611	5.93
STM2875	5.89
STM4347	5.89
STM4290	5.88
STM1802	5.87
STM1427	5.86
STM2245	5.83
STM3881	5.8
STM3724	5.76
STM1799	5.75
STM2269	5.7
STM4260	5.68
STM2067	5.68
STM0491	5.67
STM3370	5.66
STM3284	5.65
STM0398	5.63
STM2557	5.62
STM0826	5.62
STM4314	5.61
STM1696	5.6
STM2915	5.59
STM0835	5.59
STM4452	5.58
STM0134	5.57
STM0552	5.54
STM2455	5.54
STM0131	5.52
STM3056	5.47
STM2460	5.43
STM1065	5.4
STM0478	5.4
STM2785	5.36
STM4556	5.2
STM0502	5.19
STM0049	5.19
STM2976	5.18
STM0527	5.18
STM4412	5.16
STM3207	5.15
STM3713	5.11
STM2402	5.1
STM2047	5.1
STM1255	5.09
STM0226	5.08
STM0311	5.05
STM0088	5
STM2169	5
STM2790	5
STM2674	4.99
STM2053	4.93
STM1623	4.91
STM1189	4.9
STM3732	4.89
STM0455	4.89
STM1947	4.85
STM4306	4.85
STM2961	4.85
STM0817	4.84
STM0632	4.83
STM2571	4.81
STM2649	4.78
STM0713	4.78
STM0798	4.77
STM0090	4.76
STM3791	4.76
STM0992	4.75
STM2250	4.75
STM3815	4.75
STM0706	4.75
STM0991	4.74
STM1342	4.74
STM1220	4.74
STM1889	4.73
STM4269	4.73
STM1818	4.7
STM4157	4.67
STM2640	4.66
STM3064	4.66
STM3716	4.65
STM0070	4.65
STM3420	4.64
STM4189	4.64
STM3553	4.61
STM3010	4.59
STM1996	4.58
STM3627	4.57
STM0208	4.57
STM1656	4.56
STM0937	4.53
STM3501	4.5
STM3173	4.46
STM3665	4.42
STM3266	4.41
STM1491	4.4
STM4527	4.39
STM1744	4.37
STM1857	4.34
STM3661	4.33
STM3604	4.32
STM4082	4.3
STM1455	4.28
STM1706	4.26
STM4576	4.26
STM0787	4.25
STM3793	4.24
STM2512	4.24
STM2870	4.23
STM4380	4.23
STM1541	4.22
STM2289	4.22
STM4400	4.21
STM3218	4.2
STM1798	4.2
STM3706	4.18
STM4241	4.18
STM0189	4.16
STM1446	4.16
STM2177	4.14
STM4138	4.13
STM4495	4.12
STM3742	4.11
STM3484	4.1
STM3042	4.09
STM0185	4.09
STM1588	4.08
STM1481	4.05
STM0898	4.03
STM3947	4.03
STM4524	4.02
STM1762	4.01
STM1101	4.01
STM4162	4.01
STM1894	4
STM1432	3.99
STM0820	3.96
STM3651	3.95
STM4129	3.94
STM1952	3.93
STM1288	3.92
STM0040	3.91
STM1499	3.9
STM2356	3.9
STM3474	3.88
STM3503	3.88
STM4337	3.86
STM2980	3.85
STM3643	3.85
STM4298	3.85
STM2019	3.82
STM2271	3.8
STM0509	3.79
STM3215	3.79
STM4473	3.79
STM3250	3.76
STM2344	3.75
STM2767	3.74
STM1907	3.7
STM2031	3.69
STM0319	3.68
STM4277	3.67
STM2688	3.64
STM3177	3.62
STM2322	3.59
STM3695	3.59
STM0541	3.58
STM0145	3.57
STM0159	3.55
STM0121	3.55
STM3371	3.54
STM4421	3.54
STM3412	3.54
STM3719	3.53
STM3252	3.49
STM0471	3.49
STM1201	3.49
STM1913	3.47
STM1685	3.47
STM3219	3.46
STM2018	3.46
STM1903	3.45
STM2541	3.44
STM4600	3.44
STM1882	3.43
STM2905	3.43
STM3030	3.39
STM0666	3.38
STM0639	3.38
STM0960	3.37
STM1088	3.37
STM0942	3.36
STM1547	3.34
STM2138	3.33
STM2387	3.33
STM3201	3.3
STM2502	3.29
STM2239	3.29
STM3744	3.28
STM3705	3.28
STM1551	3.26
STM2979	3.25
STM0841	3.25
STM3051	3.24
STM3509	3.24
STM2978	3.21
STM2490	3.19
STM1175	3.19
STM1642	3.17
STM1100	3.16
STM3544	3.14
STM4449	3.13
STM1675	3.13
STM2291	3.12
STM3993	3.12
STM3937	3.11
STM2941	3.09
STM1060	3.09
STM2957	3.09
STM4094	3.05
STM2650	3.05
STM1083	3.05
STM3683	3.02
STM3996	2.95
STM3003	2.95
STM3805	2.95
STM3183	2.94
STM1470	2.94
STM0558	2.94
STM4411	2.93
STM1654	2.92
STM3546	2.92
STM0389	2.92
STM4508	2.92
STM2062	2.91
STM0543	2.89
STM2380	2.88
STM3469	2.88
STM2549	2.87
STM0932	2.85
STM0263	2.82
STM1664	2.82
STM4401	2.82
STM1528	2.82
STM0513	2.79
STM4367	2.78
STM1582	2.77
STM2396	2.77
STM0492	2.77
STM1370	2.75
STM2255	2.74
STM4137	2.74
STM3617	2.71
STM0264	2.7
STM0371	2.7
STM1075	2.69
STM1745	2.69
STM4174	2.67
STM3383	2.66
STM1087	2.65
STM1199	2.65
STM0183	2.64
STM4557	2.64
STM1906	2.6
STM2540	2.59
STM3794	2.58
STM0454	2.56
STM3346	2.56
STM0528	2.56
STM3091	2.55
STM0119	2.55
STM2556	2.55
STM4435	2.55
STM0789	2.55
STM1452	2.54
STM1659	2.54
STM1327	2.54
STM1498	2.53
STM3927	2.53
STM1347	2.52
STM4261	2.52
STM4127	2.51
STM3785	2.5
STM3718	2.5
STM3515	2.49
[truncated: 461 more rows]

## Sheet: Lpneumophila
Locus_Tag	Protein abundance			Site	Nuc	N_used	N_expected	Ratio				Site	Nuc	N_used	N_expected	ratio
lpg0234	3.9			1	G	148	62.905	2.35275				1	G	7	32.49	0.215451
lpg1381	5.19			2	G	248	125.81	1.97123				2	U	18	64.979	0.277013
lpg1726	5.22			3	A	298	188.714	1.57911				3	G	27	97.469	0.277011
lpg2754	11.3			4	G	314	251.286	1.24957				4	C	40	129.958	0.307792
lpg0720	11.8			5	G	225	265.286	0.848141				5	C	68	144.883	0.469344
lpg2009	11.9			6	U	187	265.286	0.7049				6	U	82	150.807	0.543741
lpg0446	12.9			7	G	143	251.286	0.569073				7	U	93	152.589	0.60948
lpg1831	13.8			8	A	121	188.714	0.641182				8	U	98	152.92	0.640858
lpg0601	15.7			9	U	84	125.81	0.667673				9	C	100	153.094	0.653193
lpg1035	15.9			10	C	20	62.905	0.31794				10	U	105	153.156	0.685575
lpg0298	16.5								GAUCA	0.580153		11	A	110	153.219	0.717927	GAUCA	0.580347
lpg0685	17.9								CCUCC	1.60016		12	U	117	153.219	0.763613	CCUCC	1.83338
lpg1706	19.2								Extended			13	G	117	153.219	0.763613	Extended	0.719551
lpg2282	19.4											14	U	166	153.219	1.08342
lpg1581	19.9											15	A	229	153.219	1.49459
lpg2028	20.8											16	A	308	153.219	2.01019
lpg1277	21.5											17	G	319	153.156	2.08284
lpg1842	21.8											18	G	346	153.094	2.26005
lpg2824	22											19	A	336	152.92	2.19723
lpg2722	22											20	G	245	152.589	1.60562
lpg2156	22.2											21	G	154	150.807	1.02117
lpg2514	22.8											22	U	109	144.883	0.752331
lpg1669	23.5											23	G	78	129.958	0.600194
lpg1488	24.2											24	A	64	97.469	0.656619
lpg1125	24.2											25	U	38	64.979	0.584804
lpg2886	24.5											26	C	10	32.49	0.307787
lpg0651	24.6
lpg2871	25.7
lpg2154	26.3
lpg1048	26.7
lpg0942	27.2
lpg1427	27.2
lpg2617	28.3
lpg0663	28.4
lpg0604	28.6
lpg1852	29.5
lpg1276	29.5
lpg0173	30
lpg2482	30.2
lpg2595	30.3
lpg0497	30.4
lpg0420	30.5
lpg1059	30.6
lpg0095	30.9
lpg2792	31
lpg0136	31.4
lpg1439	31.5
lpg1808	31.5
lpg0760	31.8
lpg1164	32.1
lpg2330	32.2
lpg0122	33.1
lpg1380	33.5
lpg2027	34.1
lpg1280	34.3
lpg0099	34.7
lpg2153	34.8
lpg1441	37.3
lpg2075	37.7
lpg0934	37.9
lpg1722	38.6
lpg2875	38.8
lpg2310	40.1
lpg0612	40.1
lpg0834	40.9
lpg1307	41.2
lpg0128	42.1
lpg1434	42.3
lpg1836	42.5
lpg0002	42.6
lpg2486	42.9
lpg0946	43.6
lpg2892	43.8
lpg0390	43.9
lpg0384	44.2
lpg0184	44.3
lpg2863	45
lpg0870	45.7
lpg0525	46.2
lpg2676	46.4
lpg2738	46.7
lpg1320	47.1
lpg0617	48.2
lpg0238	48.2
lpg1156	48.6
lpg2274	49.2
lpg0697	49.7
lpg2662	50.1
lpg0876	51.2
lpg0414	51.8
lpg0517	52.3
lpg2046	52.4
lpg2980	52.5
lpg2051	53.5
lpg0510	53.6
lpg1478	54.3
lpg0536	55.4
lpg2807	55.7
lpg1292	56.7
lpg1583	57
lpg0028	57.9
lpg0548	58
lpg0710	58.2
lpg2010	59
lpg1782	60
lpg1843	60.3
lpg2045	60.3
lpg0382	60.9
lpg1542	62.1
lpg0418	63.3
lpg2686	63.6
lpg0958	63.7
lpg0911	64.1
lpg2883	64.5
lpg2581	64.8
lpg2501	64.8
lpg0436	64.9
lpg1839	65.3
lpg2349	65.9
lpg1999	66.1
lpg0447	67.3
lpg2537	68
lpg0005	68.6
lpg0500	69.5
lpg2442	70.4
lpg2318	71.1
lpg1778	71.5
lpg2231	71.5
lpg3002	71.7
lpg0422	72.9
lpg0914	73
lpg2294	73.4
lpg1288	73.7
lpg1423	73.8
lpg2814	74.7
lpg0799	76
lpg1847	76.2
lpg2703	77.5
lpg2024	79.9
lpg2955	80.8
lpg0455	80.9
lpg0120	82
lpg2040	82.3
lpg0758	82.8
lpg1212	83.1
lpg0102	83.3
lpg2862	83.4
lpg2440	87.9
lpg0619	88.3
lpg2840	90.8
lpg1840	91.3
lpg2393	93.9
lpg0125	94.2
lpg2654	94.4
lpg2786	94.7
lpg0841	95.6
lpg2456	96.3
lpg1553	97.5
lpg1193	98.6
lpg0456	99.9
lpg0937	101
lpg0709	102
lpg2214	102
lpg1299	103
lpg0807	103
lpg2656	103
lpg1204	103
lpg2465	104
lpg2484	104
lpg1554	105
lpg1811	105
lpg0678	105
lpg0192	106
lpg2737	106
lpg2809	107
lpg1508	107
lpg1187	109
lpg0369	111
lpg1344	112
lpg1749	115
lpg1853	115
lpg2013	115
lpg0397	117
lpg2903	120
lpg0114	120
lpg1830	122
lpg2439	123
lpg1911	126
lpg1519	128
lpg2783	128
lpg2580	128
lpg2240	129
lpg0131	131
lpg0756	132
lpg2157	132
lpg0358	133
lpg1379	133
lpg0868	134
lpg2513	136
lpg2023	137
lpg1447	137
lpg0817	139
lpg1707	139
lpg2671	139
lpg1206	140
lpg1544	141
lpg2661	141
lpg2625	142
lpg0584	143
lpg0801	144
lpg2623	144
lpg1950	146
lpg2853	147
lpg1119	149
lpg1219	149
lpg2842	149
lpg0237	151
lpg2634	154
lpg0657	155
lpg2897	155
lpg0361	155
lpg1425	156
lpg2509	156
lpg0664	159
lpg2771	161
lpg1178	165
lpg1336	166
lpg0471	167
lpg0885	167
lpg0951	167
lpg1444	170
lpg1771	173
lpg2589	174
lpg1827	175
lpg1306	179
lpg1873	179
lpg0494	179
lpg0137	181
lpg2250	184
lpg1677	186
lpg1828	188
lpg2850	190
lpg0950	190
lpg2710	190
lpg1882	192
lpg0752	194
lpg2599	207
lpg0694	210
lpg1699	217
lpg2711	218
lpg0646	219
lpg2772	221
lpg1769	223
lpg2001	227
lpg1282	228
lpg1417	229
lpg2311	232
lpg1534	234
lpg2263	234
lpg0768	237
lpg2031	237
lpg0450	239
lpg2794	240
lpg2784	240
lpg0547	241
lpg2898	242
lpg0141	245
lpg0478	247
lpg2647	247
lpg2218	247
lpg0129	247
lpg1962	248
lpg1529	250
lpg2702	251
lpg0568	258
lpg0462	260
lpg1746	261
lpg2741	262
lpg0940	266
lpg0877	270
lpg2963	271
lpg1723	276
lpg0719	278
lpg1502	279
lpg0727	280
lpg2314	283
lpg2665	283
lpg0499	285
lpg0888	287
lpg0925	288
lpg2882	291
lpg2822	294
lpg1910	296
lpg0004	299
lpg1304	300
lpg2616	300
lpg1438	303
lpg2619	311
lpg2243	312
lpg0790	317
lpg0530	318
lpg0139	318
lpg0218	318
lpg0805	320
lpg0890	324
lpg2336	325
lpg0486	328
lpg2192	329
lpg0640	330
lpg2208	332
lpg0750	346
lpg2280	348
lpg1167	350
lpg1420	354
lpg0124	356
lpg2278	360
lpg1182	360
lpg0272	362
lpg2646	363
lpg0442	364
lpg1530	365
lpg1574	369
lpg0846	372
lpg2612	374
lpg1765	378
lpg0855	383
lpg2836	386
lpg1871	390
lpg1393	391
lpg2714	394
lpg2302	395
lpg2766	401
lpg2675	404
lpg0413	410
lpg0658	410
lpg1459	414
lpg2701	419
lpg2668	420
lpg2618	423
lpg2607	424
lpg2297	424
lpg0328	430
lpg2641	437
lpg0712	440
lpg0449	440
lpg0700	442
lpg1186	443
lpg0561	444
lpg0117	444
lpg2196	446
lpg1801	447
lpg1573	452
lpg1571	452
lpg2614	457
lpg1305	466
lpg1543	467
lpg2277	467
lpg2834	467
lpg0513	468
lpg2960	472
lpg1696	473
lpg0007	474
lpg2012	480
lpg0702	484
lpg0123	485
lpg1913	488
lpg1777	496
lpg2029	501
lpg2631	502
lpg1845	504
lpg1774	507
lpg0580	513
lpg0094	515
lpg2967	520
lpg1572	524
lpg0052	528
lpg2348	532
lpg0400	535
lpg1284	549
lpg0905	552
lpg2971	554
lpg1036	565
lpg0699	571
lpg0467	579
lpg0602	583
lpg0869	587
lpg2350	590
lpg0138	592
lpg2493	602
lpg0194	604
lpg0701	614
lpg0286	623
lpg2937	626
lpg0721	628
lpg1799	635
lpg0818	636
lpg0532	636
lpg2306	642
lpg2785	649
lpg0827	659
lpg0847	670
lpg0903	680
lpg2500	681
lpg0748	695
lpg1748	701
lpg1382	712
lpg0352	715
lpg_3050	723
lpg2021	724
lpg2609	744
lpg1712	755
lpg1348	761
lpg1411	765
lpg2709	766
lpg0932	770
lpg0560	778
lpg2361	779
lpg0534	784
lpg1463	795
lpg1767	813
lpg2956	820
lpg1860	828
lpg2194	830
lpg1353	831
lpg2968	858
lpg2279	859
lpg0910	867
lpg1350	875
lpg1743	882
lpg2624	895
lpg1698	895
lpg1397	900
lpg0372	900
lpg1509	901
lpg0592	902
lpg0785	925
lpg2787	959
lpg0118	961
lpg0641	976
lpg2338	977
lpg1503	993
lpg0704	996
lpg1391	1003
lpg1558	1006
lpg0426	1021
lpg1504	1022
lpg0287	1029
lpg2197	1043
lpg1824	1051
lpg0451	1062
lpg0343	1063
lpg2843	1064
lpg0672	1065
lpg1920	1078
lpg2768	1097
lpg1724	1109
lpg1861	1117
lpg2316	1118
lpg0542	1134
lpg1415	1145
lpg2639	1149
lpg0543	1167
lpg0385	1168
lpg0703	1178
lpg2026	1180
lpg2985	1192
lpg1394	1194
lpg0338	1227
lpg2707	1236
lpg1908	1244
lpg2674	1253
lpg2022	1257
lpg2951	1261
lpg0009	1267
lpg2780	1291
lpg1592	1295
lpg1331	1296
lpg2510	1298
lpg1854	1300
lpg0749	1304
lpg1412	1309
lpg2037	1317
lpg0708	1322
lpg1352	1341
lpg2796	1363
lpg1545	1364
lpg0843	1371
lpg0323	1378
lpg2712	1379
lpg0070	1407
lpg2650	1548
lpg1559	1588
lpg0399	1593
lpg2983	1595
lpg1596	1617
lpg0485	1621
lpg2966	1634
lpg2008	1648
lpg0355	1664
lpg2773	1670
lpg2781	1678
lpg0359	1683
lpg2764	1718
lpg1560	1730
lpg0452	1755
lpg0781	1776
lpg1889	1784
lpg0531	1800
lpg2002	1811
lpg2788	1817
lpg2859	1830
lpg1162	1833
lpg0725	1836
lpg0844	1860
lpg1341	1948
lpg2713	1955
lpg1750	2086
lpg2730	2109
lpg1862	2150
lpg0484	2189
lpg0923	2198
lpg0816	2259
lpg0351	2261
lpg0347	2263
lpg0335	2265
lpg2934	2310
lpg2810	2324
lpg0317	2337
lpg1364	2339
lpg2987	2347
lpg1351	2382
lpg0535	2404
lpg0463	2406
lpg1597	2519
lpg2191	2557
lpg1690	2561
lpg2651	2575
lpg1369	2578
lpg0334	2607
lpg0322	2635
lpg0336	2644
lpg0341	2768
lpg2981	2779
lpg0346	2843
lpg2726	2857
lpg0737	2866
lpg0330	2912
lpg1396	2929
lpg2986	3004
lpg0811	3117
lpg0353	3122
lpg1591	3148
lpg0689	3239
lpg0344	3276
lpg2825	3292
lpg0332	3323
lpg1711	3340
lpg2689	3398
lpg1395	3405
lpg0924	3469
lpg0320	3473
lpg0326	3474
lpg2276	3691
lpg1589	3770
lpg1205	3829
lpg2769	3918
lpg0345	4102
lpg2652	4122
lpg0340	4264
lpg0354	4449
lpg0533	4832
lpg1340	4837
lpg0922	4887
lpg1713	4979
lpg0470	5023
lpg1421	5024
lpg2352	5026
lpg0476	5089
lpg2982	5167
lpg0329	5271
lpg0324	5370
lpg0318	5382
lpg2358	5546
lpg0935	5663
lpg0865	5670
lpg0319	5714
lpg2259	5913
lpg2984	5976
lpg2308	6096
lpg2025	6245
lpg2706	6278
lpg0348	6546
lpg0342	6849
lpg1825	7060
lpg0507	7086
lpg1548	7522
lpg2636	7718
lpg0339	7843
lpg2965	8065
lpg0395	8076
lpg1714	8751
lpg2043	9198
lpg0356	10380
lpg0791	10964
lpg1915	12350
lpg0325	12544
lpg1974	18058
lpg0327	18077
lpg0314	18077
lpg2511	19257
lpg0321	21254
lpg0687	23442
lpg2112	31247
lpg2961	37327
lpg0688	50247

[truncated: 4 more sheets: Dvulgaris, Linterrogans, Ssp, Compiled_data]
